# Supplementary material for: Environmental viromes reveal global virosphere of deep-sea RNA viruses
Source: Research Square preprint supplement (doi:10.21203/rs.3.rs-1294962/v1), 2022-02-10
Supplement: Supplementary file 1 [file 2d5bf45f346659851c97a486.xlsx]

## Sheet: Sheet1
Table S5. The core viral operational taxonomic units (vOTUs) in 4 deep-sea habitats.
vOTU	Sequence number in metagenomic dataset*
vOTU-84967	DP227__982
vOTU-84965	DP227__905
vOTU-84964	DP227__860
vOTU-84963	DP227__777
vOTU-84939	DP227__73
vOTU-84961	DP227__706
vOTU-84937	DP227__70
vOTU-84936	DP227__67
vOTU-84958	DP227__580
vOTU-84957	DP227__557
vOTU-84955	DP227__487
vOTU-84934	DP227__45
vOTU-85058	DP227__3630
vOTU-85057	DP227__3626
vOTU-85052	DP227__3489
vOTU-85051	DP227__3421
vOTU-85048	DP227__3287
vOTU-85047	DP227__3274
vOTU-85043	DP227__3035
vOTU-85041	DP227__3006
vOTU-84949	DP227__294
vOTU-84948	DP227__292
vOTU-85034	DP227__2849
vOTU-85030	DP227__2750
vOTU-85027	DP227__2534
vOTU-85026	DP227__2429
vOTU-85025	DP227__2418
vOTU-85024	DP227__2363
vOTU-85022	DP227__2344
vOTU-85020	DP227__2282
vOTU-85019	DP227__2247
vOTU-85018	DP227__2120
vOTU-85011	DP227__1820
vOTU-85009	DP227__1807
vOTU-85008	DP227__1784
vOTU-85005	DP227__1707
vOTU-85001	DP227__1606
vOTU-85000	DP227__1597
vOTU-84997	DP227__1572
vOTU-84941	DP227__155
vOTU-84994	DP227__1531
vOTU-84992	DP227__1501
vOTU-84989	DP227__1443
vOTU-84985	DP227__1378
vOTU-84981	DP227__1300
vOTU-84933	DP227__13
vOTU-84974	DP227__1127
vOTU-84973	DP227__1121
vOTU-84972	DP227__1103
vOTU-84969	DP227__1025
vOTU-84868	DP226__943
vOTU-84863	DP226__788
vOTU-84854	DP226__544
vOTU-84849	DP226__495
vOTU-84843	DP226__351
vOTU-84929	DP226__3153
vOTU-84927	DP226__2998
vOTU-84841	DP226__292
vOTU-84920	DP226__2830
vOTU-84840	DP226__263
vOTU-84910	DP226__2388
vOTU-84838	DP226__220
vOTU-84896	DP226__1863
vOTU-84894	DP226__1837
vOTU-84893	DP226__1820
vOTU-84892	DP226__1819
vOTU-84890	DP226__1799
vOTU-84889	DP226__1790
vOTU-84883	DP226__1459
vOTU-84876	DP226__1216
vOTU-84875	DP226__1199
vOTU-84874	DP226__1189
vOTU-84873	DP226__1152
vOTU-84871	DP226__1086
vOTU-84870	DP226__1035
vOTU-84869	DP226__1001
vOTU-84823	DP225__983
vOTU-84822	DP225__980
vOTU-84821	DP225__970
vOTU-84819	DP225__869
vOTU-84806	DP225__71
vOTU-84814	DP225__603
vOTU-84811	DP225__395
vOTU-84809	DP225__308
vOTU-84805	DP225__23
vOTU-84829	DP225__1442
vOTU-84826	DP225__1240
vOTU-84825	DP225__1098
vOTU-84410	DP224__966
vOTU-84403	DP224__929
vOTU-84399	DP224__887
vOTU-84395	DP224__855
vOTU-84388	DP224__778
vOTU-84383	DP224__747
vOTU-84369	DP224__634
vOTU-84362	DP224__576
vOTU-84361	DP224__574
vOTU-84360	DP224__565
vOTU-84282	DP224__55
vOTU-84358	DP224__549
vOTU-84355	DP224__525
vOTU-84345	DP224__481
vOTU-84341	DP224__446
vOTU-84332	DP224__365
vOTU-84797	DP224__3520
vOTU-84794	DP224__3504
vOTU-84792	DP224__3494
vOTU-84780	DP224__3422
vOTU-84773	DP224__3376
vOTU-84766	DP224__3340
vOTU-84764	DP224__3294
vOTU-84760	DP224__3279
vOTU-84755	DP224__3240
vOTU-84739	DP224__3131
vOTU-84322	DP224__310
vOTU-84713	DP224__2948
vOTU-84704	DP224__2871
vOTU-84703	DP224__2869
vOTU-84700	DP224__2855
vOTU-84673	DP224__2676
vOTU-84666	DP224__2644
vOTU-84651	DP224__2513
vOTU-84317	DP224__250
vOTU-84625	DP224__2323
vOTU-84623	DP224__2308
vOTU-84610	DP224__2217
vOTU-84599	DP224__2161
vOTU-84588	DP224__2065
vOTU-84585	DP224__2036
vOTU-84582	DP224__2020
vOTU-84573	DP224__1963
vOTU-84572	DP224__1962
vOTU-84308	DP224__195
vOTU-84565	DP224__1904
vOTU-84550	DP224__1800
vOTU-84549	DP224__1796
vOTU-84544	DP224__1767
vOTU-84541	DP224__1754
vOTU-84537	DP224__1702
vOTU-84536	DP224__1694
vOTU-84523	DP224__1613
vOTU-84513	DP224__1575
vOTU-84495	DP224__1458
vOTU-84478	DP224__1357
vOTU-84476	DP224__1337
vOTU-84467	DP224__1285
vOTU-84445	DP224__1188
vOTU-84442	DP224__1169
vOTU-84441	DP224__1164
vOTU-84294	DP224__116
vOTU-84420	DP224__1033
vOTU-84218	DP223__615
vOTU-84261	DP223__1442
vOTU-84251	DP223__1245
vOTU-84247	DP223__1208
vOTU-84142	DP222__991
vOTU-84140	DP222__957
vOTU-84131	DP222__705
vOTU-84127	DP222__577
vOTU-84125	DP222__550
vOTU-84122	DP222__494
vOTU-84121	DP222__488
vOTU-84117	DP222__320
vOTU-84193	DP222__2404
vOTU-84192	DP222__2394
vOTU-84191	DP222__2372
vOTU-84189	DP222__2341
vOTU-84185	DP222__2209
vOTU-84183	DP222__2148
vOTU-84181	DP222__2103
vOTU-84179	DP222__2076
vOTU-84112	DP222__207
vOTU-84176	DP222__2031
vOTU-84174	DP222__1979
vOTU-84168	DP222__1814
vOTU-84111	DP222__181
vOTU-84110	DP222__172
vOTU-84161	DP222__1586
vOTU-84158	DP222__1505
vOTU-84153	DP222__1323
vOTU-84107	DP222__118
vOTU-83835	DP221__975
vOTU-83832	DP221__946
vOTU-83831	DP221__943
vOTU-83828	DP221__826
vOTU-83826	DP221__787
vOTU-84102	DP221__6622
vOTU-84087	DP221__6274
vOTU-84084	DP221__6189
vOTU-84081	DP221__6142
vOTU-84080	DP221__6137
vOTU-84075	DP221__6025
vOTU-84074	DP221__5987
vOTU-84073	DP221__5959
vOTU-84069	DP221__5780
vOTU-84062	DP221__5664
vOTU-84061	DP221__5616
vOTU-84059	DP221__5594
vOTU-84055	DP221__5516
vOTU-84053	DP221__5513
vOTU-84047	DP221__5444
vOTU-84042	DP221__5369
vOTU-84041	DP221__5368
vOTU-84033	DP221__5216
vOTU-84031	DP221__5205
vOTU-84027	DP221__5118
vOTU-84024	DP221__5112
vOTU-83812	DP221__496
vOTU-84014	DP221__4858
vOTU-84008	DP221__4741
vOTU-84002	DP221__4626
vOTU-84001	DP221__4584
vOTU-83807	DP221__445
vOTU-83994	DP221__4426
vOTU-83990	DP221__4317
vOTU-83988	DP221__4283
vOTU-83987	DP221__4280
vOTU-83985	DP221__4208
vOTU-83984	DP221__4200
vOTU-83974	DP221__4045
vOTU-83971	DP221__3961
vOTU-83968	DP221__3896
vOTU-83959	DP221__3779
vOTU-83957	DP221__3690
vOTU-83955	DP221__3677
vOTU-83953	DP221__3669
vOTU-83802	DP221__342
vOTU-83936	DP221__3247
vOTU-83934	DP221__3241
vOTU-83931	DP221__3175
vOTU-83930	DP221__3115
vOTU-83913	DP221__2750
vOTU-83912	DP221__2701
vOTU-83909	DP221__2571
vOTU-83904	DP221__2417
vOTU-83893	DP221__2130
vOTU-83888	DP221__2083
vOTU-83799	DP221__207
vOTU-83879	DP221__1890
vOTU-83878	DP221__1875
vOTU-83871	DP221__1767
vOTU-83870	DP221__1757
vOTU-83864	DP221__1636
vOTU-83854	DP221__1444
vOTU-83796	DP221__137
vOTU-83850	DP221__1308
vOTU-83848	DP221__1201
vOTU-83846	DP221__1137
vOTU-83843	DP221__1093
vOTU-83566	DP220__994
vOTU-83560	DP220__907
vOTU-83559	DP220__898
vOTU-83502	DP220__88
vOTU-83551	DP220__836
vOTU-83534	DP220__560
vOTU-83501	DP220__55
vOTU-83529	DP220__508
vOTU-83783	DP220__4162
vOTU-83774	DP220__4023
vOTU-83773	DP220__4012
vOTU-83765	DP220__3929
vOTU-83764	DP220__3914
vOTU-83760	DP220__3869
vOTU-83520	DP220__384
vOTU-83754	DP220__3804
vOTU-83745	DP220__3675
vOTU-83736	DP220__3582
vOTU-83730	DP220__3464
vOTU-83725	DP220__3383
vOTU-83724	DP220__3380
vOTU-83717	DP220__3294
vOTU-83716	DP220__3277
vOTU-83715	DP220__3251
vOTU-83514	DP220__316
vOTU-83702	DP220__3078
vOTU-83689	DP220__2884
vOTU-83688	DP220__2873
vOTU-83686	DP220__2850
vOTU-83684	DP220__2821
vOTU-83678	DP220__2741
vOTU-83511	DP220__273
vOTU-83509	DP220__263
vOTU-83646	DP220__2293
vOTU-83645	DP220__2286
vOTU-83640	DP220__2212
vOTU-83637	DP220__2139
vOTU-83636	DP220__2118
vOTU-83633	DP220__2053
vOTU-83626	DP220__1891
vOTU-83622	DP220__1859
vOTU-83610	DP220__1614
vOTU-83600	DP220__1478
vOTU-83596	DP220__1451
vOTU-83594	DP220__1411
vOTU-83593	DP220__1406
vOTU-83589	DP220__1331
vOTU-83585	DP220__1303
vOTU-83578	DP220__1166
vOTU-83574	DP220__1133
vOTU-83573	DP220__1125
vOTU-83570	DP220__1050
vOTU-83481	DP219__987
vOTU-83480	DP219__984
vOTU-83479	DP219__934
vOTU-83478	DP219__867
vOTU-83477	DP219__857
vOTU-83476	DP219__854
vOTU-83451	DP219__85
vOTU-83450	DP219__83
vOTU-83472	DP219__750
vOTU-83471	DP219__728
vOTU-83470	DP219__727
vOTU-83467	DP219__630
vOTU-83466	DP219__610
vOTU-83465	DP219__606
vOTU-83464	DP219__562
vOTU-83461	DP219__458
vOTU-83460	DP219__423
vOTU-83459	DP219__414
vOTU-83456	DP219__278
vOTU-83455	DP219__167
vOTU-83454	DP219__140
vOTU-83498	DP219__1385
vOTU-83495	DP219__1342
vOTU-83493	DP219__1295
vOTU-83453	DP219__124
vOTU-83491	DP219__1234
vOTU-83490	DP219__1218
vOTU-83489	DP219__1213
vOTU-83488	DP219__1183
vOTU-83487	DP219__1178
vOTU-83062	DP218__990
vOTU-83061	DP218__961
vOTU-83050	DP218__835
vOTU-83047	DP218__820
vOTU-83027	DP218__699
vOTU-83026	DP218__693
vOTU-83024	DP218__688
vOTU-83018	DP218__642
vOTU-83006	DP218__566
vOTU-82937	DP218__52
vOTU-82998	DP218__478
vOTU-82997	DP218__476
vOTU-82929	DP218__4
vOTU-83446	DP218__3593
vOTU-83432	DP218__3516
vOTU-83422	DP218__3456
vOTU-82977	DP218__343
vOTU-83418	DP218__3415
vOTU-83415	DP218__3391
vOTU-83407	DP218__3302
vOTU-83404	DP218__3259
vOTU-83390	DP218__3139
vOTU-83387	DP218__3129
vOTU-83374	DP218__3017
vOTU-83364	DP218__2939
vOTU-83362	DP218__2931
vOTU-83356	DP218__2900
vOTU-83346	DP218__2819
vOTU-83338	DP218__2747
vOTU-83322	DP218__2639
vOTU-83315	DP218__2577
vOTU-83306	DP218__2540
vOTU-83294	DP218__2465
vOTU-83266	DP218__2348
vOTU-83265	DP218__2341
vOTU-83257	DP218__2244
vOTU-83254	DP218__2233
vOTU-83253	DP218__2223
vOTU-83251	DP218__2192
vOTU-83227	DP218__2071
vOTU-83222	DP218__2043
vOTU-83209	DP218__1940
vOTU-83167	DP218__1634
vOTU-83162	DP218__1611
vOTU-83155	DP218__1577
vOTU-83154	DP218__1572
vOTU-82957	DP218__157
vOTU-83142	DP218__1503
vOTU-83130	DP218__1461
vOTU-83129	DP218__1444
vOTU-83119	DP218__1385
vOTU-83118	DP218__1380
vOTU-83094	DP218__1249
vOTU-83092	DP218__1231
vOTU-83091	DP218__1223
vOTU-83079	DP218__1104
vOTU-83078	DP218__1088
vOTU-83076	DP218__1058
vOTU-82946	DP218__103
vOTU-83066	DP218__1013
vOTU-83064	DP218__1005
vOTU-82927	DP218__1
vOTU-82889	DP217__574
vOTU-82873	DP217__56
vOTU-82884	DP217__463
vOTU-82882	DP217__382
vOTU-82926	DP217__3791
vOTU-82925	DP217__3787
vOTU-82924	DP217__3588
vOTU-82922	DP217__3419
vOTU-82920	DP217__3305
vOTU-82918	DP217__2841
vOTU-82916	DP217__2727
vOTU-82915	DP217__2718
vOTU-82913	DP217__2523
vOTU-82912	DP217__2493
vOTU-82911	DP217__2208
vOTU-82910	DP217__2191
vOTU-82907	DP217__2122
vOTU-82875	DP217__180
vOTU-82904	DP217__1780
vOTU-82897	DP217__1528
vOTU-82896	DP217__1446
vOTU-82895	DP217__1394
vOTU-82893	DP217__1241
vOTU-82891	DP217__1150
vOTU-82836	DP216__851
vOTU-82834	DP216__810
vOTU-82833	DP216__764
vOTU-82829	DP216__567
vOTU-82828	DP216__554
vOTU-82827	DP216__539
vOTU-82871	DP216__1807
vOTU-82864	DP216__1620
vOTU-82862	DP216__1594
vOTU-82861	DP216__1569
vOTU-82857	DP216__1404
vOTU-82855	DP216__1330
vOTU-82854	DP216__1326
vOTU-82852	DP216__1290
vOTU-82849	DP216__1238
vOTU-82848	DP216__1236
vOTU-82844	DP216__1130
vOTU-82843	DP216__1119
vOTU-82813	DP216__106
vOTU-82839	DP216__1029
vOTU-82838	DP216__1021
vOTU-82837	DP216__1012
vOTU-82775	DP215__855
vOTU-82769	DP215__641
vOTU-82767	DP215__495
vOTU-82766	DP215__416
vOTU-82765	DP215__413
vOTU-82809	DP215__3596
vOTU-82807	DP215__3458
vOTU-82804	DP215__3234
vOTU-82803	DP215__2932
vOTU-82800	DP215__2703
vOTU-82792	DP215__2049
vOTU-82791	DP215__1943
vOTU-82761	DP215__174
vOTU-82788	DP215__1711
vOTU-82786	DP215__1635
vOTU-82760	DP215__163
vOTU-82759	DP215__147
vOTU-82781	DP215__1369
vOTU-82780	DP215__1288
vOTU-82779	DP215__1205
vOTU-82778	DP215__1102
vOTU-82777	DP215__1024
vOTU-82758	DP215__101
vOTU-82741	DP214__786
vOTU-82740	DP214__755
vOTU-82739	DP214__722
vOTU-82738	DP214__715
vOTU-82719	DP214__6
vOTU-82732	DP214__471
vOTU-82731	DP214__461
vOTU-82729	DP214__386
vOTU-82723	DP214__151
vOTU-82755	DP214__1418
vOTU-82752	DP214__1312
vOTU-82751	DP214__1244
vOTU-82748	DP214__1133
vOTU-82747	DP214__1099
vOTU-82745	DP214__1051
vOTU-82646	DP213__956
vOTU-82643	DP213__785
vOTU-82638	DP213__405
vOTU-82718	DP213__3209
vOTU-82713	DP213__3120
vOTU-82712	DP213__3094
vOTU-82711	DP213__3020
vOTU-82709	DP213__2941
vOTU-82708	DP213__2930
vOTU-82703	DP213__2781
vOTU-82702	DP213__2754
vOTU-82700	DP213__2630
vOTU-82699	DP213__2629
vOTU-82698	DP213__2573
vOTU-82697	DP213__2554
vOTU-82696	DP213__2526
vOTU-82695	DP213__2523
vOTU-82694	DP213__2511
vOTU-82685	DP213__2185
vOTU-82678	DP213__2016
vOTU-82676	DP213__1993
vOTU-82669	DP213__1883
vOTU-82664	DP213__1544
vOTU-82662	DP213__1489
vOTU-82661	DP213__1476
vOTU-82660	DP213__1473
vOTU-82657	DP213__1444
vOTU-82656	DP213__1419
vOTU-82655	DP213__1414
vOTU-82653	DP213__1245
vOTU-82652	DP213__1243
vOTU-82077	DP212__975
vOTU-82065	DP212__864
vOTU-82064	DP212__860
vOTU-82062	DP212__844
vOTU-82061	DP212__839
vOTU-82060	DP212__836
vOTU-82052	DP212__775
vOTU-82047	DP212__759
vOTU-82039	DP212__705
vOTU-81954	DP212__64
vOTU-82010	DP212__547
vOTU-82007	DP212__531
vOTU-82631	DP212__4635
vOTU-82628	DP212__4626
vOTU-82614	DP212__4507
vOTU-82580	DP212__4254
vOTU-82571	DP212__4208
vOTU-82564	DP212__4180
vOTU-82557	DP212__4115
vOTU-82549	DP212__4075
vOTU-81995	DP212__404
vOTU-82512	DP212__3759
vOTU-82508	DP212__3738
vOTU-82504	DP212__3719
vOTU-81989	DP212__367
vOTU-82493	DP212__3655
vOTU-82490	DP212__3636
vOTU-82488	DP212__3629
vOTU-82487	DP212__3625
vOTU-82485	DP212__3618
vOTU-82477	DP212__3573
vOTU-82471	DP212__3529
vOTU-82460	DP212__3424
vOTU-82458	DP212__3410
vOTU-82440	DP212__3286
vOTU-82439	DP212__3271
vOTU-82430	DP212__3234
vOTU-82424	DP212__3189
vOTU-82402	DP212__3065
vOTU-82389	DP212__2992
vOTU-82371	DP212__2854
vOTU-82366	DP212__2842
vOTU-82357	DP212__2793
vOTU-82355	DP212__2783
vOTU-82353	DP212__2771
vOTU-82352	DP212__2760
vOTU-82339	DP212__2697
vOTU-81973	DP212__261
vOTU-82305	DP212__2484
vOTU-82294	DP212__2414
vOTU-82292	DP212__2403
vOTU-82281	DP212__2299
vOTU-82271	DP212__2219
vOTU-82266	DP212__2201
vOTU-82251	DP212__2110
vOTU-82240	DP212__2037
vOTU-82234	DP212__1980
vOTU-82224	DP212__1882
vOTU-81967	DP212__180
vOTU-81965	DP212__175
vOTU-82191	DP212__1697
vOTU-82177	DP212__1605
vOTU-82176	DP212__1593
vOTU-82161	DP212__1516
vOTU-82156	DP212__1468
vOTU-82144	DP212__1384
vOTU-82141	DP212__1375
vOTU-82140	DP212__1374
vOTU-81961	DP212__137
vOTU-82135	DP212__1346
vOTU-82134	DP212__1345
vOTU-82131	DP212__1334
vOTU-82130	DP212__1333
vOTU-82128	DP212__1330
vOTU-82122	DP212__1280
vOTU-82120	DP212__1267
vOTU-82114	DP212__1221
vOTU-81960	DP212__109
vOTU-82100	DP212__1079
vOTU-82093	DP212__1048
vOTU-81793	DP211__590
vOTU-81783	DP211__421
vOTU-81945	DP211__3594
vOTU-81942	DP211__3553
vOTU-81774	DP211__336
vOTU-81926	DP211__3110
vOTU-81922	DP211__2990
vOTU-81918	DP211__2921
vOTU-81915	DP211__2871
vOTU-81771	DP211__278
vOTU-81901	DP211__2586
vOTU-81896	DP211__2476
vOTU-81871	DP211__2118
vOTU-81769	DP211__192
vOTU-81767	DP211__188
vOTU-81857	DP211__1865
vOTU-81766	DP211__186
vOTU-81851	DP211__1743
vOTU-81848	DP211__1728
vOTU-81834	DP211__1404
vOTU-81764	DP211__136
vOTU-81826	DP211__1312
vOTU-81256	DP210__893
vOTU-81741	DP210__7773
vOTU-81711	DP210__7338
vOTU-81706	DP210__7230
vOTU-81691	DP210__6959
vOTU-81242	DP210__693
vOTU-81676	DP210__6781
vOTU-81657	DP210__6561
vOTU-81238	DP210__630
vOTU-81237	DP210__620
vOTU-81613	DP210__5899
vOTU-81612	DP210__5839
vOTU-81605	DP210__5776
vOTU-81579	DP210__5485
vOTU-81536	DP210__5058
vOTU-81508	DP210__4688
vOTU-81506	DP210__4674
vOTU-81440	DP210__3572
vOTU-81435	DP210__3521
vOTU-81426	DP210__3450
vOTU-81380	DP210__2752
vOTU-81379	DP210__2726
vOTU-81376	DP210__2693
vOTU-81356	DP210__2468
vOTU-81327	DP210__2007
vOTU-81313	DP210__1888
vOTU-81199	DP210__119
vOTU-81265	DP210__1001
vOTU-81149	DP209__9475
vOTU-81147	DP209__9439
vOTU-81129	DP209__9117
vOTU-81127	DP209__9101
vOTU-81084	DP209__8325
vOTU-81062	DP209__7949
vOTU-81050	DP209__7774
vOTU-81047	DP209__7724
vOTU-81045	DP209__7690
vOTU-81032	DP209__7510
vOTU-81007	DP209__7248
vOTU-80997	DP209__7119
vOTU-80987	DP209__7046
vOTU-80973	DP209__6812
vOTU-80966	DP209__6748
vOTU-80960	DP209__6624
vOTU-80958	DP209__6598
vOTU-80954	DP209__6538
vOTU-80922	DP209__6017
vOTU-80918	DP209__5998
vOTU-80907	DP209__5823
vOTU-80882	DP209__5447
vOTU-80876	DP209__5356
vOTU-80871	DP209__5256
vOTU-80843	DP209__4931
vOTU-80833	DP209__4862
vOTU-80829	DP209__4791
vOTU-80800	DP209__4437
vOTU-80773	DP209__4048
vOTU-80741	DP209__3160
vOTU-80737	DP209__3093
vOTU-80722	DP209__2852
vOTU-80695	DP209__2380
vOTU-80677	DP209__2153
vOTU-80674	DP209__2121
vOTU-80658	DP209__1896
vOTU-80652	DP209__1841
vOTU-80648	DP209__1744
vOTU-80625	DP209__1417
vOTU-80604	DP209__1120
vOTU-80596	DP209__1030
vOTU-81191	DP209__10051
vOTU-80490	DP208__96
vOTU-80496	DP208__661
vOTU-80494	DP208__404
vOTU-80525	DP208__3988
vOTU-80492	DP208__372
vOTU-80520	DP208__3535
vOTU-80518	DP208__3066
vOTU-80515	DP208__2760
vOTU-80509	DP208__2038
vOTU-80508	DP208__1952
vOTU-80507	DP208__1787
vOTU-80503	DP208__1663
vOTU-80500	DP208__1304
vOTU-80498	DP208__1017
vOTU-80456	DP207__898
vOTU-80455	DP207__893
vOTU-80450	DP207__748
vOTU-80412	DP207__73
vOTU-80448	DP207__714
vOTU-80447	DP207__704
vOTU-80445	DP207__686
vOTU-80442	DP207__602
vOTU-80441	DP207__581
vOTU-80437	DP207__505
vOTU-80435	DP207__491
vOTU-80434	DP207__468
vOTU-80426	DP207__307
vOTU-80424	DP207__293
vOTU-80423	DP207__268
vOTU-80487	DP207__1688
vOTU-80484	DP207__1529
vOTU-80482	DP207__1513
vOTU-80479	DP207__1490
vOTU-80478	DP207__1444
vOTU-80477	DP207__1442
vOTU-80475	DP207__1403
vOTU-80416	DP207__138
vOTU-80415	DP207__115
vOTU-80459	DP207__1009
vOTU-80383	DP206__938
vOTU-80379	DP206__841
vOTU-80378	DP206__819
vOTU-80377	DP206__730
vOTU-80376	DP206__668
vOTU-80374	DP206__647
vOTU-80373	DP206__629
vOTU-80371	DP206__579
vOTU-80370	DP206__570
vOTU-80367	DP206__384
vOTU-80355	DP206__36
vOTU-80364	DP206__291
vOTU-80362	DP206__281
vOTU-80361	DP206__203
vOTU-80409	DP206__1800
vOTU-80408	DP206__1788
vOTU-80406	DP206__1760
vOTU-80359	DP206__174
vOTU-80404	DP206__1716
vOTU-80403	DP206__1704
vOTU-80401	DP206__1690
vOTU-80358	DP206__167
vOTU-80399	DP206__1644
vOTU-80396	DP206__1501
vOTU-80394	DP206__1373
vOTU-80392	DP206__1234
vOTU-80354	DP206__12
vOTU-80389	DP206__1151
vOTU-80387	DP206__1064
vOTU-79404	DP205__983
vOTU-79388	DP205__911
vOTU-79345	DP205__706
vOTU-79342	DP205__689
vOTU-79333	DP205__628
vOTU-80349	DP205__5598
vOTU-80344	DP205__5579
vOTU-80328	DP205__5475
vOTU-80312	DP205__5403
vOTU-80310	DP205__5396
vOTU-80254	DP205__5134
vOTU-80236	DP205__5035
vOTU-80213	DP205__4910
vOTU-80210	DP205__4886
vOTU-80174	DP205__4720
vOTU-80164	DP205__4683
vOTU-80161	DP205__4672
vOTU-80153	DP205__4655
vOTU-80150	DP205__4634
vOTU-80145	DP205__4606
vOTU-79288	DP205__458
vOTU-80092	DP205__4364
vOTU-79280	DP205__436
vOTU-80080	DP205__4286
vOTU-80074	DP205__4261
vOTU-80068	DP205__4227
vOTU-79998	DP205__3831
vOTU-79997	DP205__3830
vOTU-79988	DP205__3795
vOTU-79982	DP205__3760
vOTU-79268	DP205__376
vOTU-79964	DP205__3691
vOTU-79957	DP205__3644
vOTU-79952	DP205__3611
vOTU-79947	DP205__3581
vOTU-79944	DP205__3570
vOTU-79937	DP205__3539
vOTU-79933	DP205__3524
vOTU-79932	DP205__3523
vOTU-79930	DP205__3518
vOTU-79927	DP205__3498
vOTU-79914	DP205__3457
vOTU-79896	DP205__3386
vOTU-79876	DP205__3313
vOTU-79837	DP205__3103
vOTU-79829	DP205__3059
vOTU-79254	DP205__305
vOTU-79817	DP205__3020
vOTU-79807	DP205__2986
vOTU-79252	DP205__296
vOTU-79791	DP205__2882
vOTU-79251	DP205__288
vOTU-79790	DP205__2876
vOTU-79765	DP205__2788
vOTU-79247	DP205__276
vOTU-79736	DP205__2653
vOTU-79723	DP205__2601
vOTU-79714	DP205__2547
vOTU-79709	DP205__2505
vOTU-79707	DP205__2500
vOTU-79686	DP205__2381
vOTU-79680	DP205__2354
vOTU-79669	DP205__2295
vOTU-79651	DP205__2142
vOTU-79639	DP205__2103
vOTU-79638	DP205__2092
vOTU-79235	DP205__199
vOTU-79611	DP205__1964
vOTU-79233	DP205__196
vOTU-79588	DP205__1885
vOTU-79574	DP205__1806
vOTU-79553	DP205__1692
vOTU-79549	DP205__1679
vOTU-79223	DP205__167
vOTU-79542	DP205__1653
vOTU-79526	DP205__1580
vOTU-79509	DP205__1496
vOTU-79506	DP205__1490
vOTU-79502	DP205__1445
vOTU-79495	DP205__1414
vOTU-79483	DP205__1345
vOTU-79467	DP205__1290
vOTU-79172	DP204__998
vOTU-79171	DP204__981
vOTU-79170	DP204__980
vOTU-79169	DP204__974
vOTU-79168	DP204__970
vOTU-79166	DP204__888
vOTU-79165	DP204__861
vOTU-79164	DP204__846
vOTU-79163	DP204__834
vOTU-79134	DP204__83
vOTU-79162	DP204__812
vOTU-79161	DP204__737
vOTU-79160	DP204__735
vOTU-79159	DP204__734
vOTU-79158	DP204__729
vOTU-79155	DP204__705
vOTU-79154	DP204__695
vOTU-79151	DP204__658
vOTU-79150	DP204__612
vOTU-79149	DP204__580
vOTU-79148	DP204__481
vOTU-79133	DP204__46
vOTU-79147	DP204__455
vOTU-79146	DP204__446
vOTU-79143	DP204__275
vOTU-79142	DP204__250
vOTU-79139	DP204__193
vOTU-79138	DP204__183
vOTU-79137	DP204__170
vOTU-79136	DP204__155
vOTU-79184	DP204__1359
vOTU-79182	DP204__1291
vOTU-79181	DP204__1224
vOTU-79179	DP204__1128
vOTU-79177	DP204__1120
vOTU-79176	DP204__1103
vOTU-79135	DP204__100
vOTU-79132	DP204__10
vOTU-78984	DP203__999
vOTU-78981	DP203__983
vOTU-78973	DP203__907
vOTU-78963	DP203__832
vOTU-78962	DP203__790
vOTU-78956	DP203__733
vOTU-78945	DP203__633
vOTU-78936	DP203__531
vOTU-78930	DP203__479
vOTU-78889	DP203__36
vOTU-78918	DP203__336
vOTU-79131	DP203__2386
vOTU-79118	DP203__2297
vOTU-79111	DP203__2202
vOTU-79110	DP203__2191
vOTU-79108	DP203__2159
vOTU-79104	DP203__2139
vOTU-79094	DP203__2044
vOTU-79089	DP203__1967
vOTU-79072	DP203__1810
vOTU-79058	DP203__1635
vOTU-79054	DP203__1623
vOTU-79045	DP203__1531
vOTU-78903	DP203__150
vOTU-79038	DP203__1484
vOTU-78902	DP203__132
vOTU-79015	DP203__1275
vOTU-79013	DP203__1266
vOTU-79012	DP203__1260
vOTU-78998	DP203__1144
vOTU-78990	DP203__1052
vOTU-78751	DP202__996
vOTU-78750	DP202__995
vOTU-78692	DP202__83
vOTU-78744	DP202__825
vOTU-78743	DP202__808
vOTU-78691	DP202__80
vOTU-78737	DP202__767
vOTU-78690	DP202__62
vOTU-78726	DP202__570
vOTU-78715	DP202__476
vOTU-78884	DP202__2611
vOTU-78881	DP202__2582
vOTU-78880	DP202__2552
vOTU-78869	DP202__2419
vOTU-78868	DP202__2409
vOTU-78687	DP202__24
vOTU-78701	DP202__235
vOTU-78860	DP202__2316
vOTU-78854	DP202__2228
vOTU-78850	DP202__2190
vOTU-78847	DP202__2128
vOTU-78845	DP202__2104
vOTU-78843	DP202__2049
vOTU-78841	DP202__2017
vOTU-78835	DP202__1897
vOTU-78825	DP202__1770
vOTU-78815	DP202__1693
vOTU-78805	DP202__1589
vOTU-78802	DP202__1549
vOTU-78799	DP202__1489
vOTU-78786	DP202__1375
vOTU-78782	DP202__1325
vOTU-78779	DP202__1288
vOTU-78695	DP202__122
vOTU-78771	DP202__1185
vOTU-78770	DP202__1173
vOTU-78768	DP202__1159
vOTU-78765	DP202__1122
vOTU-78762	DP202__1098
vOTU-78760	DP202__1078
vOTU-78759	DP202__1065
vOTU-78757	DP202__1060
vOTU-78509	DP201__981
vOTU-78504	DP201__936
vOTU-78496	DP201__867
vOTU-78418	DP201__82
vOTU-78486	DP201__787
vOTU-78476	DP201__639
vOTU-78437	DP201__278
vOTU-78655	DP201__2615
vOTU-78620	DP201__2203
vOTU-78428	DP201__219
vOTU-78612	DP201__2123
vOTU-78608	DP201__2087
vOTU-78599	DP201__2000
vOTU-78587	DP201__1849
vOTU-78579	DP201__1728
vOTU-78573	DP201__1649
vOTU-78570	DP201__1621
vOTU-78540	DP201__1310
vOTU-78531	DP201__1227
vOTU-78524	DP201__1137
vOTU-78037	DP200__826
vOTU-78035	DP200__822
vOTU-78031	DP200__792
vOTU-78027	DP200__739
vOTU-78024	DP200__732
vOTU-78016	DP200__704
vOTU-78012	DP200__663
vOTU-78010	DP200__661
vOTU-78001	DP200__571
vOTU-77999	DP200__563
vOTU-77982	DP200__434
vOTU-78397	DP200__3645
vOTU-78395	DP200__3620
vOTU-78376	DP200__3471
vOTU-78342	DP200__3210
vOTU-78340	DP200__3202
vOTU-78335	DP200__3170
vOTU-78322	DP200__3030
vOTU-78319	DP200__3021
vOTU-78317	DP200__3003
vOTU-78298	DP200__2892
vOTU-78296	DP200__2870
vOTU-78294	DP200__2849
vOTU-78293	DP200__2840
vOTU-78244	DP200__2363
vOTU-78243	DP200__2359
vOTU-78240	DP200__2326
vOTU-78233	DP200__2276
vOTU-78232	DP200__2272
vOTU-77962	DP200__227
vOTU-78231	DP200__2261
vOTU-78227	DP200__2222
vOTU-77941	DP200__21
vOTU-78209	DP200__2042
vOTU-78206	DP200__2031
vOTU-77957	DP200__201
vOTU-78202	DP200__2007
vOTU-78198	DP200__1966
vOTU-77954	DP200__193
vOTU-77953	DP200__191
vOTU-77952	DP200__187
vOTU-78183	DP200__1839
vOTU-78172	DP200__1755
vOTU-78164	DP200__1693
vOTU-78146	DP200__1621
vOTU-78141	DP200__1600
vOTU-78135	DP200__1532
vOTU-78124	DP200__1485
vOTU-78109	DP200__1409
vOTU-78076	DP200__1140
vOTU-78073	DP200__1121
vOTU-78069	DP200__1071
vOTU-77926	DP199__991
vOTU-77923	DP199__888
vOTU-77922	DP199__861
vOTU-77921	DP199__841
vOTU-77897	DP199__83
vOTU-77916	DP199__676
vOTU-77915	DP199__646
vOTU-77914	DP199__616
vOTU-77911	DP199__530
vOTU-77905	DP199__338
vOTU-77901	DP199__234
vOTU-77900	DP199__171
vOTU-77938	DP199__1333
vOTU-77936	DP199__1274
vOTU-77934	DP199__1215
vOTU-77932	DP199__1115
vOTU-77931	DP199__1093
vOTU-77929	DP199__1063
vOTU-77927	DP199__1022
vOTU-77893	DP199__1
vOTU-77244	DP198__984
vOTU-77236	DP198__936
vOTU-77233	DP198__908
vOTU-77223	DP198__787
vOTU-77885	DP198__7741
vOTU-77884	DP198__7739
vOTU-77222	DP198__768
vOTU-77878	DP198__7666
vOTU-77871	DP198__7617
vOTU-77867	DP198__7578
vOTU-77864	DP198__7543
vOTU-77851	DP198__7439
vOTU-77846	DP198__7377
vOTU-77834	DP198__7259
vOTU-77819	DP198__7165
vOTU-77817	DP198__7151
vOTU-77805	DP198__7000
vOTU-77787	DP198__6776
vOTU-77775	DP198__6634
vOTU-77773	DP198__6622
vOTU-77762	DP198__6555
vOTU-77746	DP198__6446
vOTU-77740	DP198__6411
vOTU-77734	DP198__6359
vOTU-77733	DP198__6351
vOTU-77731	DP198__6333
vOTU-77722	DP198__6257
vOTU-77715	DP198__6191
vOTU-77713	DP198__6166
vOTU-77708	DP198__6112
vOTU-77214	DP198__603
vOTU-77700	DP198__6008
vOTU-77692	DP198__5908
vOTU-77681	DP198__5836
vOTU-77665	DP198__5689
vOTU-77652	DP198__5579
vOTU-77647	DP198__5552
vOTU-77646	DP198__5551
vOTU-77636	DP198__5452
vOTU-77211	DP198__532
vOTU-77623	DP198__5302
vOTU-77610	DP198__5191
vOTU-77209	DP198__516
vOTU-77598	DP198__5069
vOTU-77207	DP198__503
vOTU-77595	DP198__5026
vOTU-77594	DP198__5022
vOTU-77592	DP198__5015
vOTU-77588	DP198__4971
vOTU-77572	DP198__4726
vOTU-77570	DP198__4720
vOTU-77567	DP198__4707
vOTU-77564	DP198__4675
vOTU-77562	DP198__4672
vOTU-77561	DP198__4659
vOTU-77197	DP198__465
vOTU-77559	DP198__4642
vOTU-77549	DP198__4578
vOTU-77542	DP198__4487
vOTU-77537	DP198__4355
vOTU-77153	DP198__42
vOTU-77524	DP198__4150
vOTU-77189	DP198__408
vOTU-77517	DP198__4073
vOTU-77497	DP198__3811
vOTU-77494	DP198__3793
vOTU-77489	DP198__3745
vOTU-77488	DP198__3724
vOTU-77485	DP198__3696
vOTU-77482	DP198__3669
vOTU-77479	DP198__3639
vOTU-77464	DP198__3409
vOTU-77152	DP198__33
vOTU-77443	DP198__3151
vOTU-77441	DP198__3141
vOTU-77438	DP198__3136
vOTU-77435	DP198__3103
vOTU-77399	DP198__2736
vOTU-77393	DP198__2672
vOTU-77387	DP198__2632
vOTU-77379	DP198__2561
vOTU-77377	DP198__2545
vOTU-77371	DP198__2496
vOTU-77366	DP198__2476
vOTU-77355	DP198__2350
vOTU-77349	DP198__2289
vOTU-77171	DP198__216
vOTU-77334	DP198__2131
vOTU-77323	DP198__2011
vOTU-77168	DP198__194
vOTU-77305	DP198__1802
vOTU-77303	DP198__1773
vOTU-77302	DP198__1752
vOTU-77298	DP198__1745
vOTU-77296	DP198__1722
vOTU-77164	DP198__164
vOTU-77293	DP198__1631
vOTU-77287	DP198__1604
vOTU-77284	DP198__1526
vOTU-77283	DP198__1509
vOTU-77280	DP198__1484
vOTU-77157	DP198__137
vOTU-76527	DP197__815
vOTU-76388	DP197__7
vOTU-76497	DP197__676
vOTU-76475	DP197__568
vOTU-77126	DP197__4834
vOTU-77122	DP197__4805
vOTU-77117	DP197__4781
vOTU-77112	DP197__4722
vOTU-77107	DP197__4695
vOTU-77098	DP197__4621
vOTU-77083	DP197__4514
vOTU-77030	DP197__4118
vOTU-77021	DP197__4057
vOTU-77004	DP197__3974
vOTU-76998	DP197__3931
vOTU-76996	DP197__3925
vOTU-76986	DP197__3877
vOTU-76985	DP197__3875
vOTU-76960	DP197__3708
vOTU-76957	DP197__3686
vOTU-76954	DP197__3628
vOTU-76951	DP197__3606
vOTU-76918	DP197__3439
vOTU-76914	DP197__3411
vOTU-76908	DP197__3388
vOTU-76906	DP197__3373
vOTU-76891	DP197__3271
vOTU-76859	DP197__3051
vOTU-76823	DP197__2839
vOTU-76815	DP197__2776
vOTU-76813	DP197__2748
vOTU-76809	DP197__2717
vOTU-76790	DP197__2598
vOTU-76787	DP197__2582
vOTU-76781	DP197__2559
vOTU-76768	DP197__2420
vOTU-76735	DP197__2204
vOTU-76704	DP197__2030
vOTU-76695	DP197__1998
vOTU-76684	DP197__1933
vOTU-76682	DP197__1924
vOTU-76677	DP197__1896
vOTU-76644	DP197__1701
vOTU-76634	DP197__1631
vOTU-76628	DP197__1594
vOTU-76594	DP197__1333
vOTU-76581	DP197__1244
vOTU-76406	DP197__122
vOTU-76342	DP196__660
vOTU-76340	DP196__623
vOTU-76339	DP196__619
vOTU-76334	DP196__349
vOTU-76332	DP196__329
vOTU-76321	DP196__32
vOTU-76331	DP196__310
vOTU-76328	DP196__299
vOTU-76326	DP196__212
vOTU-76382	DP196__2042
vOTU-76381	DP196__1991
vOTU-76378	DP196__1897
vOTU-76377	DP196__1866
vOTU-76375	DP196__1831
vOTU-76374	DP196__1824
vOTU-76373	DP196__1743
vOTU-76370	DP196__1606
vOTU-76368	DP196__1555
vOTU-76365	DP196__1457
vOTU-76364	DP196__1431
vOTU-76362	DP196__1370
vOTU-76355	DP196__1149
vOTU-76297	DP195__993
vOTU-76294	DP195__938
vOTU-76293	DP195__919
vOTU-76291	DP195__770
vOTU-76290	DP195__761
vOTU-76287	DP195__739
vOTU-76283	DP195__687
vOTU-76282	DP195__610
vOTU-76281	DP195__602
vOTU-76278	DP195__533
vOTU-76259	DP195__50
vOTU-76274	DP195__476
vOTU-76270	DP195__391
vOTU-76317	DP195__1537
vOTU-76264	DP195__152
vOTU-76315	DP195__1518
vOTU-76314	DP195__1516
vOTU-76311	DP195__1425
vOTU-76310	DP195__1419
vOTU-76309	DP195__1387
vOTU-76307	DP195__1284
vOTU-76306	DP195__1252
vOTU-76305	DP195__1217
vOTU-76304	DP195__1180
vOTU-76302	DP195__1168
vOTU-76301	DP195__1164
vOTU-76298	DP195__1139
vOTU-76217	DP194__970
vOTU-76214	DP194__859
vOTU-76213	DP194__837
vOTU-76211	DP194__824
vOTU-76210	DP194__768
vOTU-76209	DP194__745
vOTU-76206	DP194__692
vOTU-76183	DP194__69
vOTU-76199	DP194__543
vOTU-76198	DP194__542
vOTU-76196	DP194__396
vOTU-76191	DP194__226
vOTU-76189	DP194__204
vOTU-76256	DP194__1866
vOTU-76255	DP194__1855
vOTU-76248	DP194__1791
vOTU-76247	DP194__1777
vOTU-76240	DP194__1617
vOTU-76239	DP194__1582
vOTU-76236	DP194__1510
vOTU-76235	DP194__1507
vOTU-76234	DP194__1468
vOTU-76233	DP194__1456
vOTU-76187	DP194__145
vOTU-76231	DP194__1371
vOTU-76229	DP194__1266
vOTU-76227	DP194__1209
vOTU-76225	DP194__1164
vOTU-76224	DP194__1156
vOTU-76222	DP194__1070
vOTU-76218	DP194__1002
vOTU-72399	DP193__9913
vOTU-72389	DP193__9860
vOTU-72370	DP193__9765
vOTU-70506	DP193__961
vOTU-72333	DP193__9556
vOTU-72329	DP193__9536
vOTU-72323	DP193__9520
vOTU-72284	DP193__9339
vOTU-72269	DP193__9238
vOTU-70503	DP193__915
vOTU-72199	DP193__8905
vOTU-72197	DP193__8902
vOTU-72186	DP193__8830
vOTU-72175	DP193__8794
vOTU-72166	DP193__8766
vOTU-72161	DP193__8729
vOTU-70340	DP193__87
vOTU-72134	DP193__8612
vOTU-72127	DP193__8593
vOTU-72125	DP193__8574
vOTU-72124	DP193__8563
vOTU-70489	DP193__840
vOTU-72084	DP193__8387
vOTU-72076	DP193__8351
vOTU-72046	DP193__8198
vOTU-72042	DP193__8176
vOTU-70484	DP193__811
vOTU-72025	DP193__8089
vOTU-72001	DP193__7983
vOTU-70480	DP193__798
vOTU-71999	DP193__7979
vOTU-71979	DP193__7912
vOTU-71967	DP193__7825
vOTU-71928	DP193__7679
vOTU-71925	DP193__7673
vOTU-71921	DP193__7632
vOTU-70476	DP193__759
vOTU-71880	DP193__7445
vOTU-70471	DP193__739
vOTU-71856	DP193__7350
vOTU-71824	DP193__7182
vOTU-71786	DP193__7014
vOTU-70466	DP193__689
vOTU-71761	DP193__6888
vOTU-71699	DP193__6562
vOTU-71680	DP193__6492
vOTU-71670	DP193__6449
vOTU-71659	DP193__6395
vOTU-71658	DP193__6385
vOTU-70451	DP193__630
vOTU-70450	DP193__624
vOTU-71619	DP193__6176
vOTU-70443	DP193__598
vOTU-71580	DP193__5963
vOTU-71576	DP193__5936
vOTU-70439	DP193__578
vOTU-71536	DP193__5712
vOTU-71518	DP193__5655
vOTU-71509	DP193__5613
vOTU-71483	DP193__5504
vOTU-71476	DP193__5466
vOTU-71474	DP193__5443
vOTU-71464	DP193__5414
vOTU-71438	DP193__5303
vOTU-71434	DP193__5290
vOTU-71429	DP193__5280
vOTU-71422	DP193__5245
vOTU-71382	DP193__5063
vOTU-71377	DP193__5052
vOTU-71368	DP193__5001
vOTU-71362	DP193__4976
vOTU-71361	DP193__4974
vOTU-71321	DP193__4777
vOTU-71317	DP193__4756
vOTU-71316	DP193__4727
vOTU-71310	DP193__4672
vOTU-71308	DP193__4665
vOTU-71303	DP193__4631
vOTU-71299	DP193__4617
vOTU-71293	DP193__4596
vOTU-71263	DP193__4463
vOTU-71241	DP193__4389
vOTU-71237	DP193__4381
vOTU-71231	DP193__4356
vOTU-71225	DP193__4342
vOTU-71216	DP193__4292
vOTU-71210	DP193__4262
vOTU-71202	DP193__4225
vOTU-71198	DP193__4212
vOTU-71191	DP193__4194
vOTU-71182	DP193__4163
vOTU-71172	DP193__4127
vOTU-71155	DP193__4074
vOTU-71154	DP193__4073
vOTU-71153	DP193__4071
vOTU-71151	DP193__4050
vOTU-71141	DP193__4021
vOTU-71135	DP193__3996
vOTU-71123	DP193__3928
vOTU-71078	DP193__3668
vOTU-71067	DP193__3608
vOTU-71041	DP193__3500
vOTU-70389	DP193__341
vOTU-71024	DP193__3390
vOTU-71023	DP193__3386
vOTU-70987	DP193__3216
vOTU-70986	DP193__3214
vOTU-70979	DP193__3166
vOTU-70970	DP193__3107
vOTU-70935	DP193__2899
vOTU-70932	DP193__2886
vOTU-70918	DP193__2849
vOTU-70914	DP193__2832
vOTU-76163	DP193__28163
vOTU-76144	DP193__28030
vOTU-76141	DP193__28020
vOTU-70908	DP193__2802
vOTU-76140	DP193__28009
vOTU-76137	DP193__28006
vOTU-76132	DP193__27972
vOTU-76118	DP193__27880
vOTU-76109	DP193__27845
vOTU-76078	DP193__27708
vOTU-76073	DP193__27674
vOTU-76071	DP193__27671
vOTU-76053	DP193__27603
vOTU-76044	DP193__27566
vOTU-76031	DP193__27509
vOTU-70892	DP193__2729
vOTU-75960	DP193__27136
vOTU-75958	DP193__27130
vOTU-75948	DP193__27066
vOTU-75947	DP193__27062
vOTU-75937	DP193__26992
vOTU-75919	DP193__26925
vOTU-75902	DP193__26825
vOTU-75891	DP193__26767
vOTU-75888	DP193__26745
vOTU-75883	DP193__26734
vOTU-75879	DP193__26722
vOTU-75853	DP193__26591
vOTU-70869	DP193__2659
vOTU-75847	DP193__26569
vOTU-75835	DP193__26501
vOTU-75827	DP193__26445
vOTU-75823	DP193__26419
vOTU-75822	DP193__26415
vOTU-75810	DP193__26379
vOTU-75790	DP193__26306
vOTU-70862	DP193__2620
vOTU-75768	DP193__26192
vOTU-75762	DP193__26162
vOTU-70861	DP193__2616
vOTU-75756	DP193__26150
vOTU-70859	DP193__2613
vOTU-70858	DP193__2604
vOTU-75733	DP193__26015
vOTU-75730	DP193__26003
vOTU-75723	DP193__25981
vOTU-75712	DP193__25916
vOTU-75702	DP193__25827
vOTU-75665	DP193__25606
vOTU-75644	DP193__25512
vOTU-75640	DP193__25502
vOTU-75639	DP193__25500
vOTU-75633	DP193__25463
vOTU-75632	DP193__25449
vOTU-75624	DP193__25426
vOTU-75623	DP193__25425
vOTU-75617	DP193__25391
vOTU-70842	DP193__2535
vOTU-75609	DP193__25313
vOTU-75587	DP193__25221
vOTU-75563	DP193__25155
vOTU-75553	DP193__25112
vOTU-75535	DP193__25001
vOTU-70832	DP193__2493
vOTU-75497	DP193__24828
vOTU-75467	DP193__24684
vOTU-75454	DP193__24611
vOTU-75439	DP193__24554
vOTU-75431	DP193__24493
vOTU-75417	DP193__24435
vOTU-75399	DP193__24354
vOTU-75394	DP193__24330
vOTU-75390	DP193__24319
vOTU-75379	DP193__24269
vOTU-75366	DP193__24231
vOTU-75349	DP193__24167
vOTU-75344	DP193__24157
vOTU-75335	DP193__24104
vOTU-75322	DP193__24050
vOTU-75320	DP193__24034
vOTU-75317	DP193__24027
vOTU-70806	DP193__2397
vOTU-75265	DP193__23753
vOTU-75249	DP193__23681
vOTU-70797	DP193__2359
vOTU-75228	DP193__23567
vOTU-75214	DP193__23500
vOTU-75213	DP193__23489
vOTU-75207	DP193__23466
vOTU-75174	DP193__23259
vOTU-75169	DP193__23234
vOTU-75134	DP193__23053
vOTU-75133	DP193__23052
vOTU-75128	DP193__23027
vOTU-75093	DP193__22892
vOTU-75083	DP193__22854
vOTU-75078	DP193__22843
vOTU-75075	DP193__22839
vOTU-75050	DP193__22726
vOTU-70774	DP193__2265
vOTU-75021	DP193__22587
vOTU-75003	DP193__22482
vOTU-74984	DP193__22367
vOTU-74938	DP193__22145
vOTU-74930	DP193__22093
vOTU-70757	DP193__2201
vOTU-70752	DP193__2189
vOTU-74869	DP193__21798
vOTU-74867	DP193__21787
vOTU-74864	DP193__21763
vOTU-74852	DP193__21703
vOTU-74775	DP193__21360
vOTU-74760	DP193__21302
vOTU-74744	DP193__21212
vOTU-74718	DP193__21101
vOTU-74693	DP193__21015
vOTU-74659	DP193__20855
vOTU-74649	DP193__20814
vOTU-74630	DP193__20733
vOTU-74607	DP193__20649
vOTU-74592	DP193__20550
vOTU-74558	DP193__20388
vOTU-74522	DP193__20218
vOTU-74505	DP193__20104
vOTU-70714	DP193__2010
vOTU-74492	DP193__20048
vOTU-74485	DP193__19991
vOTU-74475	DP193__19946
vOTU-74450	DP193__19834
vOTU-74433	DP193__19748
vOTU-74428	DP193__19742
vOTU-74410	DP193__19660
vOTU-74382	DP193__19517
vOTU-74368	DP193__19449
vOTU-74333	DP193__19281
vOTU-74330	DP193__19260
vOTU-74316	DP193__19210
vOTU-74299	DP193__19112
vOTU-74279	DP193__19007
vOTU-74275	DP193__18989
vOTU-74263	DP193__18894
vOTU-74250	DP193__18810
vOTU-74217	DP193__18653
vOTU-74209	DP193__18595
vOTU-74206	DP193__18586
vOTU-74201	DP193__18562
vOTU-74199	DP193__18555
vOTU-74194	DP193__18541
vOTU-74190	DP193__18514
vOTU-74172	DP193__18433
vOTU-74161	DP193__18386
vOTU-74140	DP193__18301
vOTU-74139	DP193__18300
vOTU-74133	DP193__18278
vOTU-74132	DP193__18273
vOTU-74099	DP193__18040
vOTU-74055	DP193__17853
vOTU-74050	DP193__17834
vOTU-74044	DP193__17802
vOTU-74037	DP193__17751
vOTU-74035	DP193__17738
vOTU-74019	DP193__17674
vOTU-74014	DP193__17657
vOTU-74007	DP193__17628
vOTU-74006	DP193__17622
vOTU-70655	DP193__1759
vOTU-73996	DP193__17581
vOTU-73989	DP193__17548
vOTU-73971	DP193__17429
vOTU-73961	DP193__17368
vOTU-73934	DP193__17257
vOTU-73905	DP193__17107
vOTU-73894	DP193__17068
vOTU-73892	DP193__17058
vOTU-73883	DP193__17009
vOTU-73874	DP193__16974
vOTU-73867	DP193__16948
vOTU-73790	DP193__16546
vOTU-73784	DP193__16512
vOTU-73778	DP193__16488
vOTU-73771	DP193__16458
vOTU-70632	DP193__1630
vOTU-73735	DP193__16289
vOTU-73731	DP193__16280
vOTU-73712	DP193__16157
vOTU-73687	DP193__16041
vOTU-73681	DP193__16026
vOTU-73678	DP193__16022
vOTU-73675	DP193__16007
vOTU-73668	DP193__15973
vOTU-70624	DP193__1590
vOTU-73654	DP193__15895
vOTU-73650	DP193__15877
vOTU-73597	DP193__15682
vOTU-73587	DP193__15642
vOTU-73574	DP193__15572
vOTU-73566	DP193__15532
vOTU-73564	DP193__15522
vOTU-73544	DP193__15453
vOTU-73542	DP193__15436
vOTU-73539	DP193__15403
vOTU-73527	DP193__15347
vOTU-73512	DP193__15273
vOTU-70612	DP193__1527
vOTU-73492	DP193__15186
vOTU-73474	DP193__15107
vOTU-73461	DP193__15056
vOTU-73459	DP193__15046
vOTU-73448	DP193__15008
vOTU-73443	DP193__14990
vOTU-73432	DP193__14940
vOTU-73414	DP193__14877
vOTU-73405	DP193__14840
vOTU-73401	DP193__14830
vOTU-73393	DP193__14790
vOTU-73376	DP193__14698
vOTU-70602	DP193__1465
vOTU-73364	DP193__14629
vOTU-73352	DP193__14592
vOTU-73337	DP193__14535
vOTU-73336	DP193__14534
vOTU-73315	DP193__14410
vOTU-73284	DP193__14283
vOTU-73237	DP193__14073
vOTU-73202	DP193__13912
vOTU-70591	DP193__1388
vOTU-73159	DP193__13724
vOTU-73144	DP193__13669
vOTU-73138	DP193__13651
vOTU-73123	DP193__13585
vOTU-73120	DP193__13556
vOTU-73103	DP193__13437
vOTU-73072	DP193__13290
vOTU-73067	DP193__13264
vOTU-73066	DP193__13263
vOTU-73062	DP193__13249
vOTU-73046	DP193__13185
vOTU-73038	DP193__13137
vOTU-73029	DP193__13091
vOTU-73026	DP193__13079
vOTU-73022	DP193__13068
vOTU-73003	DP193__12972
vOTU-72996	DP193__12935
vOTU-72975	DP193__12832
vOTU-70570	DP193__1276
vOTU-72955	DP193__12744
vOTU-72936	DP193__12668
vOTU-72923	DP193__12594
vOTU-72864	DP193__12218
vOTU-70559	DP193__1221
vOTU-72837	DP193__12102
vOTU-72827	DP193__12065
vOTU-72817	DP193__12011
vOTU-72793	DP193__11914
vOTU-72785	DP193__11880
vOTU-72755	DP193__11768
vOTU-72749	DP193__11736
vOTU-72740	DP193__11683
vOTU-72738	DP193__11679
vOTU-72721	DP193__11590
vOTU-72701	DP193__11480
vOTU-72696	DP193__11456
vOTU-72687	DP193__11401
vOTU-72630	DP193__11110
vOTU-72622	DP193__11068
vOTU-72621	DP193__11064
vOTU-72603	DP193__11003
vOTU-72585	DP193__10906
vOTU-72563	DP193__10807
vOTU-72551	DP193__10739
vOTU-72549	DP193__10727
vOTU-72546	DP193__10706
vOTU-70533	DP193__1068
vOTU-72539	DP193__10646
vOTU-72516	DP193__10553
vOTU-72498	DP193__10430
vOTU-72495	DP193__10412
vOTU-72493	DP193__10403
vOTU-70525	DP193__1037
vOTU-72461	DP193__10253
vOTU-72460	DP193__10237
vOTU-72458	DP193__10221
vOTU-72445	DP193__10161
vOTU-72444	DP193__10160
vOTU-72439	DP193__10134
vOTU-72417	DP193__10007
vOTU-72415	DP193__10001
vOTU-70082	DP192__929
vOTU-70076	DP192__841
vOTU-70074	DP192__822
vOTU-70070	DP192__776
vOTU-70314	DP192__5454
vOTU-70057	DP192__539
vOTU-70308	DP192__5321
vOTU-70302	DP192__5253
vOTU-70297	DP192__5150
vOTU-70294	DP192__5119
vOTU-70054	DP192__489
vOTU-70283	DP192__4836
vOTU-70281	DP192__4834
vOTU-70274	DP192__4692
vOTU-70257	DP192__4371
vOTU-70254	DP192__4344
vOTU-70248	DP192__4278
vOTU-70052	DP192__427
vOTU-70245	DP192__4223
vOTU-70239	DP192__4024
vOTU-70237	DP192__4015
vOTU-70235	DP192__3980
vOTU-70231	DP192__3843
vOTU-70228	DP192__3777
vOTU-70225	DP192__3728
vOTU-70191	DP192__3078
vOTU-70189	DP192__3046
vOTU-70182	DP192__2949
vOTU-70177	DP192__2731
vOTU-70028	DP192__27
vOTU-70164	DP192__2555
vOTU-70155	DP192__2413
vOTU-70153	DP192__2402
vOTU-70038	DP192__228
vOTU-70149	DP192__2277
vOTU-70138	DP192__2128
vOTU-70136	DP192__2097
vOTU-70111	DP192__1615
vOTU-70109	DP192__1594
vOTU-70103	DP192__1414
vOTU-70100	DP192__1374
vOTU-70033	DP192__133
vOTU-69184	DP191__97
vOTU-69183	DP191__91
vOTU-69283	DP191__909
vOTU-69274	DP191__789
vOTU-69269	DP191__764
vOTU-70023	DP191__6925
vOTU-69997	DP191__6719
vOTU-69996	DP191__6715
vOTU-69994	DP191__6711
vOTU-69992	DP191__6697
vOTU-69989	DP191__6690
vOTU-69979	DP191__6603
vOTU-69975	DP191__6583
vOTU-69971	DP191__6566
vOTU-69962	DP191__6470
vOTU-69959	DP191__6439
vOTU-69953	DP191__6371
vOTU-69906	DP191__6006
vOTU-69904	DP191__5996
vOTU-69901	DP191__5974
vOTU-69869	DP191__5728
vOTU-69864	DP191__5682
vOTU-69177	DP191__56
vOTU-69838	DP191__5466
vOTU-69820	DP191__5331
vOTU-69818	DP191__5327
vOTU-69811	DP191__5285
vOTU-69803	DP191__5240
vOTU-69176	DP191__52
vOTU-69790	DP191__5159
vOTU-69777	DP191__5053
vOTU-69770	DP191__4942
vOTU-69762	DP191__4896
vOTU-69761	DP191__4894
vOTU-69760	DP191__4887
vOTU-69748	DP191__4785
vOTU-69744	DP191__4750
vOTU-69736	DP191__4657
vOTU-69733	DP191__4641
vOTU-69174	DP191__46
vOTU-69723	DP191__4561
vOTU-69236	DP191__445
vOTU-69702	DP191__4390
vOTU-69699	DP191__4353
vOTU-69683	DP191__4185
vOTU-69682	DP191__4178
vOTU-69672	DP191__4099
vOTU-69660	DP191__4009
vOTU-69652	DP191__3953
vOTU-69630	DP191__3763
vOTU-69624	DP191__3693
vOTU-69617	DP191__3631
vOTU-69593	DP191__3384
vOTU-69590	DP191__3364
vOTU-69217	DP191__315
vOTU-69213	DP191__302
vOTU-69557	DP191__3014
vOTU-69555	DP191__3002
vOTU-69537	DP191__2862
vOTU-69535	DP191__2832
vOTU-69525	DP191__2746
vOTU-69516	DP191__2690
vOTU-69508	DP191__2632
vOTU-69168	DP191__26
vOTU-69501	DP191__2578
vOTU-69500	DP191__2572
vOTU-69499	DP191__2570
vOTU-69484	DP191__2421
vOTU-69471	DP191__2313
vOTU-69462	DP191__2239
vOTU-69457	DP191__2218
vOTU-69448	DP191__2141
vOTU-69435	DP191__2019
vOTU-69417	DP191__1857
vOTU-69401	DP191__1732
vOTU-69400	DP191__1731
vOTU-69399	DP191__1716
vOTU-69192	DP191__171
vOTU-69390	DP191__1677
vOTU-69389	DP191__1672
vOTU-69387	DP191__1657
vOTU-69384	DP191__1638
vOTU-69383	DP191__1628
vOTU-69363	DP191__1514
vOTU-69356	DP191__1474
vOTU-69352	DP191__1452
vOTU-69346	DP191__1420
vOTU-69340	DP191__1374
vOTU-69326	DP191__1251
vOTU-69322	DP191__1218
vOTU-69294	DP191__1024
vOTU-69291	DP191__1009
vOTU-69113	DP190__962
vOTU-69110	DP190__903
vOTU-69106	DP190__825
vOTU-69098	DP190__700
vOTU-69091	DP190__622
vOTU-69085	DP190__442
vOTU-69075	DP190__189
vOTU-69148	DP190__1671
vOTU-69145	DP190__1652
vOTU-69141	DP190__1505
vOTU-69140	DP190__1489
vOTU-69138	DP190__1442
vOTU-69135	DP190__1399
vOTU-69133	DP190__1342
vOTU-69131	DP190__1317
vOTU-69127	DP190__1245
vOTU-69125	DP190__1188
vOTU-58302	DP189__9995
vOTU-58290	DP189__9954
vOTU-58237	DP189__9706
vOTU-58227	DP189__9667
vOTU-58182	DP189__9502
vOTU-55812	DP189__948
vOTU-58170	DP189__9472
vOTU-58163	DP189__9422
vOTU-58134	DP189__9313
vOTU-58122	DP189__9269
vOTU-55804	DP189__922
vOTU-58094	DP189__9154
vOTU-58067	DP189__9048
vOTU-58050	DP189__8998
vOTU-58033	DP189__8913
vOTU-58031	DP189__8910
vOTU-55798	DP189__890
vOTU-57983	DP189__8738
vOTU-57961	DP189__8637
vOTU-57955	DP189__8621
vOTU-57946	DP189__8593
vOTU-57907	DP189__8488
vOTU-57903	DP189__8461
vOTU-57900	DP189__8456
vOTU-57869	DP189__8338
vOTU-57834	DP189__8236
vOTU-57832	DP189__8226
vOTU-57822	DP189__8201
vOTU-57775	DP189__7978
vOTU-57764	DP189__7944
vOTU-57758	DP189__7930
vOTU-55774	DP189__793
vOTU-57744	DP189__7880
vOTU-57730	DP189__7817
vOTU-57718	DP189__7768
vOTU-57717	DP189__7767
vOTU-55766	DP189__772
vOTU-57669	DP189__7631
vOTU-57668	DP189__7630
vOTU-57660	DP189__7607
vOTU-57656	DP189__7587
vOTU-57649	DP189__7553
vOTU-57648	DP189__7552
vOTU-57633	DP189__7506
vOTU-55757	DP189__750
vOTU-57556	DP189__7203
vOTU-57552	DP189__7179
vOTU-57548	DP189__7155
vOTU-57537	DP189__7126
vOTU-57516	DP189__7051
vOTU-57514	DP189__7040
vOTU-57510	DP189__7031
vOTU-57505	DP189__7014
vOTU-57497	DP189__6983
vOTU-55747	DP189__698
vOTU-57490	DP189__6957
vOTU-57489	DP189__6954
vOTU-57458	DP189__6856
vOTU-57438	DP189__6802
vOTU-57434	DP189__6777
vOTU-57428	DP189__6758
vOTU-57426	DP189__6751
vOTU-57404	DP189__6637
vOTU-55727	DP189__646
vOTU-57358	DP189__6421
vOTU-57301	DP189__6201
vOTU-57299	DP189__6197
vOTU-57291	DP189__6168
vOTU-57266	DP189__6097
vOTU-57236	DP189__5993
vOTU-57231	DP189__5979
vOTU-57225	DP189__5947
vOTU-57214	DP189__5926
vOTU-57205	DP189__5884
vOTU-57181	DP189__5805
vOTU-57173	DP189__5779
vOTU-57144	DP189__5680
vOTU-55704	DP189__561
vOTU-57116	DP189__5601
vOTU-57114	DP189__5599
vOTU-57094	DP189__5537
vOTU-57083	DP189__5510
vOTU-57073	DP189__5472
vOTU-57060	DP189__5427
vOTU-57051	DP189__5401
vOTU-57014	DP189__5282
vOTU-57004	DP189__5245
vOTU-56985	DP189__5175
vOTU-56976	DP189__5112
vOTU-56956	DP189__5069
vOTU-69055	DP189__50455
vOTU-69043	DP189__50405
vOTU-69035	DP189__50361
vOTU-69025	DP189__50320
vOTU-56941	DP189__5017
vOTU-56940	DP189__5016
vOTU-55688	DP189__501
vOTU-68971	DP189__50087
vOTU-68969	DP189__50082
vOTU-68965	DP189__50060
vOTU-68956	DP189__50025
vOTU-68951	DP189__49999
vOTU-68924	DP189__49887
vOTU-68906	DP189__49798
vOTU-68860	DP189__49642
vOTU-68836	DP189__49570
vOTU-68803	DP189__49449
vOTU-68797	DP189__49425
vOTU-68781	DP189__49382
vOTU-68768	DP189__49319
vOTU-68752	DP189__49270
vOTU-68745	DP189__49243
vOTU-68734	DP189__49178
vOTU-68720	DP189__49144
vOTU-68694	DP189__49033
vOTU-68665	DP189__48915
vOTU-68664	DP189__48909
vOTU-68589	DP189__48640
vOTU-68584	DP189__48621
vOTU-68583	DP189__48620
vOTU-68554	DP189__48517
vOTU-56900	DP189__4847
vOTU-68506	DP189__48325
vOTU-68503	DP189__48320
vOTU-68477	DP189__48200
vOTU-68458	DP189__48138
vOTU-68453	DP189__48113
vOTU-68446	DP189__48090
vOTU-68414	DP189__47994
vOTU-68407	DP189__47974
vOTU-68368	DP189__47810
vOTU-68339	DP189__47697
vOTU-68335	DP189__47687
vOTU-68334	DP189__47676
vOTU-68332	DP189__47672
vOTU-68328	DP189__47656
vOTU-68281	DP189__47514
vOTU-68276	DP189__47500
vOTU-68275	DP189__47497
vOTU-56871	DP189__4748
vOTU-68254	DP189__47426
vOTU-68250	DP189__47414
vOTU-68214	DP189__47297
vOTU-56866	DP189__4726
vOTU-68192	DP189__47207
vOTU-68181	DP189__47180
vOTU-68174	DP189__47151
vOTU-56863	DP189__4715
vOTU-68161	DP189__47101
vOTU-68160	DP189__47097
vOTU-68151	DP189__47074
vOTU-68108	DP189__46934
vOTU-68032	DP189__46611
vOTU-68020	DP189__46574
vOTU-67962	DP189__46327
vOTU-67918	DP189__46169
vOTU-67916	DP189__46164
vOTU-67882	DP189__46037
vOTU-67866	DP189__45945
vOTU-67859	DP189__45930
vOTU-67853	DP189__45905
vOTU-67845	DP189__45873
vOTU-67833	DP189__45809
vOTU-67825	DP189__45773
vOTU-56825	DP189__4557
vOTU-67748	DP189__45469
vOTU-67745	DP189__45461
vOTU-56820	DP189__4541
vOTU-67672	DP189__45172
vOTU-67651	DP189__45090
vOTU-67635	DP189__45025
vOTU-67613	DP189__44942
vOTU-67566	DP189__44770
vOTU-67552	DP189__44703
vOTU-67543	DP189__44659
vOTU-67520	DP189__44567
vOTU-67518	DP189__44562
vOTU-67504	DP189__44524
vOTU-67499	DP189__44507
vOTU-67495	DP189__44486
vOTU-67487	DP189__44463
vOTU-67472	DP189__44415
vOTU-56795	DP189__4439
vOTU-67442	DP189__44311
[truncated: 6,101 more rows]
