# Supplementary material for: Environmental viromes reveal global virosphere of deep-sea RNA viruses
Source: Research Square preprint supplement (doi:10.21203/rs.3.rs-1294962/v1), 2022-02-10
Supplement: Supplementary file 1 [file a0015a43724524363b04536c.pdf]

1    **Extended data**

2    Fig S1

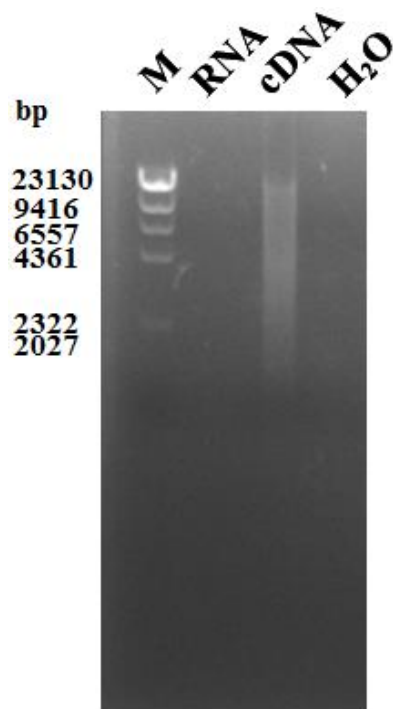

3

4    **Fig S1. Isothermal amplification of the extracted viral genomic RNAs and**

5    **cDNAs.** The viral genomic RNAs were extracted from the purified deep-sea virions,

6    followed by reverse transcription to synthesize cDNAs. The extracted RNAs and

7    cDNAs of each of 133 sediment samples were subjected to isothermal amplification.

8    Distilled water was used as a control. The representative image of 133 deep-sea

9    sediment samples was presented. M, DNA marker.

10

11

12

13

14

15 Fig S2

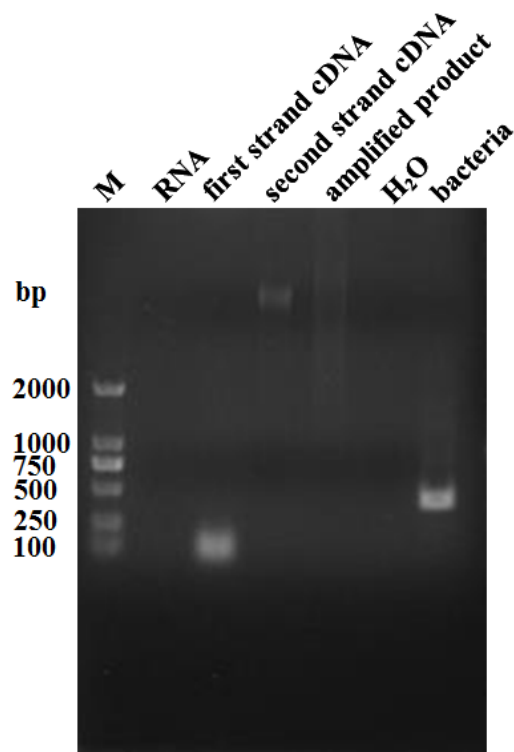

16

17 **Fig S2. Detection of bacteria in samples.** The viral genomic RNAs, extracted from  
18 the purified deep-sea virions, were transcribed into cDNAs, followed by isothermal  
19 amplification. The extracted viral RNAs, the first-strand cDNA, the second-strand  
20 cDNA and the amplified product of each of 133 sediment samples were subjected to  
21 PCR using the bacterial 16S rRNA gene-specific primers. Distilled water and bacteria  
22 were used as controls. The representative image of 133 deep-sea sediment samples  
23 was shown. M, DNA marker.
