# Supplementary material for: Environmental viromes reveal global virosphere of deep-sea RNA viruses
Source: Research Square preprint supplement (doi:10.21203/rs.3.rs-1294962/v1), 2022-02-10
Supplement: Supplementary file 2 [file 4ba69e75821a165def4e77cd.xlsx]

## Sheet: Sheet1
Table S2. Numbers of contigs and viral operational taxonomic units (vOTUs) of 133 samples.
Sample	≥ 1 kb contigs	Viral contigs	Viral OTUs	N50 of viral OTU	Max length of viral OTU	Minimum length of viral OTU
DP002	494	54	54	3511	18711	1019
DP003	4016	1200	1200	3713	158381	1000
DP004	2333	324	324	6214	70011	1009
DP005	619	277	277	194975	581766	1003
DP006	3037	1501	1501	1558	28253	1000
DP007	8071	4692	4690	2296	28712	1000
DP008	1868	462	462	2721	35099	1000
DP009	3825	423	423	12270	162996	1002
DP010	3171	1168	1167	5945	142675	1003
DP026	992	74	74	3672	15893	1016
DP031	1214	171	171	4913	24819	1001
DP040	615	70	70	2844	27308	1028
DP042	575	45	45	5656	20677	1002
DP046	502	41	41	6190	15806	1012
DP047	797	175	175	3803	26060	1004
DP049	1115	131	131	3339	20642	1000
DP052	1703	160	160	3153	25249	1003
DP053	288	37	37	350135	585027	1042
DP055	1092	89	89	1883	12549	1011
DP057	9779	5478	5478	2432	17974	1000
DP058	3553	1315	1315	2482	20976	1000
DP059	645	83	83	6704	19279	1003
DP060	1360	70	70	5897	34056	1012
DP078	2484	367	367	3511	53389	1001
DP081	3904	1212	1212	2444	26729	1000
DP082	896	167	167	222490	391940	1000
DP086	902	90	90	4097	14486	1001
DP088	9614	5896	5893	1683	25742	1000
DP089	263	25	25	158448	346705	1009
DP091	2935	598	598	2536	35400	1000
DP095	7665	1480	1480	1864	34564	1000
DP098	2955	1506	1506	2119	15220	1000
DP099	2862	1612	1612	1690	13061	1000
DP100	913	99	99	3813	20875	1001
DP117	3272	1148	1148	2290	22385	1000
DP118	1411	80	80	3121	17088	1000
DP119	156	27	27	220321	426027	1037
DP120	1897	1009	1009	1867	7737	1000
DP122	1004	73	73	2567	19861	1004
DP123	657	77	77	4227	26234	1002
DP124	963	160	160	2927	20198	1000
DP125	5132	2894	2894	2396	31216	1000
DP126	353	88	88	1460	7066	1001
DP128	1493	643	643	1460	17079	1000
DP129	9190	4853	4853	2303	27853	1000
DP132	1273	578	578	1785	10305	1000
DP141	333	21	21	1542	4391	1006
DP142	464	45	45	2932	18562	1010
DP143	693	43	43	2594	13015	1009
DP144	255	24	24	1357	2327	1033
DP145	219	28	28	1854	7296	1004
DP146	642	22	22	8203	22945	1057
DP147	428	47	47	5202	15122	1024
DP148	1036	247	247	2170	9005	1001
DP149	3386	1823	1823	1518	56483	1000
DP150	525	63	63	2614	8199	1006
DP151	788	55	55	4247	11720	1020
DP152	886	63	63	2559	18876	1016
DP153	666	50	50	3178	16890	1002
DP154	681	110	110	1591	10565	1001
DP155	740	188	188	2930	34831	1000
DP156	257	52	52	1924	7419	1000
DP157	813	124	124	1517	5775	1000
DP158	13052	4055	4041	1669	21583	1000
DP159	779	69	69	1986	5847	1002
DP160	4290	906	906	2048	122184	1000
DP161	3242	314	314	4841	26132	1000
DP162	849	371	371	2178	14296	1000
DP163	3783	2004	2004	2204	21591	1000
DP164	1305	535	535	3260	28777	1000
DP165	4548	318	318	6354	46075	1003
DP166	2422	944	944	2276	35700	1001
DP167	369	31	31	5215	11443	1004
DP168	240	38	38	1944	12955	1003
DP169	143	24	24	371839	585854	1012
DP170	183	33	33	354019	592523	1082
DP171	1556	223	223	4231	91112	1003
DP172	613	41	41	2252	11527	1009
DP173	721	152	152	5017	36450	1000
DP174	696	45	45	2805	9442	1003
DP175	978	62	62	4044	16047	1003
DP176	1326	357	357	2546	22556	1001
DP177	663	49	49	2365	10514	1011
DP178	579	58	58	4933	23756	1026
DP179	758	44	44	8765	34317	1001
DP180	645	66	66	2629	15074	1048
DP181	590	76	76	2144	14147	1015
DP182	798	151	151	2050	8007	1001
DP183	237	39	38	205934	408566	1003
DP184	853	108	108	4150	24582	1000
DP185	951	68	68	2360	17835	1007
DP186	2102	467	467	2678	37879	1003
DP187	748	105	105	2390	14339	1000
DP188	570	59	59	5828	33774	1003
DP189	22662	13691	13691	2366	32339	1000
DP190	820	113	113	2641	14089	1008
DP191	2756	884	884	1762	19545	1002
DP192	2324	305	305	3621	74655	1000
DP193	11178	5965	5964	1968	39305	1000
DP194	578	84	84	2874	13380	1002
DP195	604	70	70	3845	11469	1009
DP196	835	74	74	3301	21511	1007
DP197	2087	785	785	1974	12732	1000
DP198	2502	763	763	1612	24049	1000
DP199	586	62	62	7616	29501	1003
DP200	1485	485	485	2434	13927	1000
DP201	1015	283	283	1939	9690	1004
DP202	1096	218	218	2515	18935	1000
DP203	871	257	257	2164	12337	1000
DP204	481	69	69	6791	21768	1028
DP205	2480	1194	1194	2237	18661	1000
DP206	723	65	65	2821	23606	1007
DP207	798	94	94	3178	17482	1015
DP208	908	45	45	6980	33939	1003
DP209	4338	691	691	2418	25719	1002
DP210	3463	587	587	2120	21081	1000
DP211	1629	199	199	3661	27718	1012
DP212	1948	723	723	2867	18704	1000
DP213	1618	104	104	4399	17416	1008
DP214	530	57	57	5022	24084	1013
DP215	1193	59	59	4482	12123	1007
DP216	577	67	67	4890	17899	1002
DP217	887	69	69	5121	25077	1006
DP218	1367	534	534	2208	18993	1000
DP219	564	58	58	6270	20909	1022
DP220	1603	311	311	3152	23924	1007
DP221	2734	331	331	6180	63325	1000
DP222	987	110	110	3195	25473	1009
DP223	272	82	82	1143	4820	1000
DP224	1398	543	543	2031	10589	1000
DP225	537	40	40	5340	11263	1028
DP226	1198	114	114	4643	18819	1005
DP227	966	155	155	1800	15637	1002
Total	261857	87879	85059
N50 represented the length of vOTUs which were less than that of half of all vOTUs.
