# Supplementary material for: Environmental viromes reveal global virosphere of deep-sea RNA viruses
Source: Research Square preprint supplement (doi:10.21203/rs.3.rs-1294962/v1), 2022-02-10
Supplement: Supplementary file 3 [file 50964fc94e31ee04a46f9e56.xlsx]

## Sheet: binning2virus2host
Table S3. Taxonomy and hosts of the known viral operational taxonomic units (vOTUs).
vOTU	Sequence number in metagenomic dataset*	Matched viral family	Matched viral species	Host
vOTU-45669	DP158__12103	Metaviridae	-	environment
vOTU-39247	DP129__12547	Retroviridae	Human endogenous retrovirus W	vertebrate
vOTU-46346	DP158__17916	Metaviridae	-	environment
vOTU-54462	DP178__585	Totiviridae	Totiviridae sp.	environment
vOTU-32130	DP120__3964	Cystoviridae	Cystoviridae sp.	invertebrate
vOTU-71944	DP193__7741	Retroviridae	-	vertebrate
vOTU-47833	DP158__30725	Metaviridae	-	environment
vOTU-84961	DP227__706	Betaflexiviridae	Cherry twisted leaf associated virus	plant
vOTU-74827	DP193__21585	Leviviridae	Leviviridae sp.	bacterium
vOTU-22824	DP088__15911	Retroviridae	Human endogenous retrovirus W	vertebrate
vOTU-36298	DP129__450	Retroviridae	Human endogenous retrovirus H	vertebrate
vOTU-31307	DP118__2022	Retroviridae	Feline immunodeficiency virus	vertebrate
vOTU-45915	DP158__14076	Retroviridae	Human endogenous retrovirus W	vertebrate
vOTU-82656	DP213__1419	Totiviridae	Totiviridae sp.	environment
vOTU-50852	DP163__4678	Retroviridae	Human endogenous retrovirus K	vertebrate
vOTU-69779	DP191__5058	Retroviridae	Feline immunodeficiency virus	vertebrate
vOTU-10482	DP052__1846	Retroviridae	Feline immunodeficiency virus	vertebrate
vOTU-10562	DP053__87	Potyviridae	Iris mild mosaic virus	plant
vOTU-44672	DP158__2961	Metaviridae	-	environment
vOTU-41661	DP146__903	Leviviridae	Leviviridae sp.	bacterium
vOTU-16742	DP058__4092	Cystoviridae	Cystoviridae sp.	invertebrate
vOTU-80583	DP209__916	Metaviridae	-	environment
vOTU-11572	DP057__3228	Retroviridae	Porcine type-C oncovirus	vertebrate
vOTU-78697	DP202__204	Metaviridae	-	environment
vOTU-30107	DP100__457	Retroviridae	Feline leukemia virus	vertebrate
vOTU-48123	DP158__33379	Metaviridae	-	environment
vOTU-49265	DP161__1211	Metaviridae	-	environment
vOTU-25857	DP095__3476	Metaviridae	-	plant
vOTU-9914	DP031__1081	Retroviridae	Feline immunodeficiency virus	vertebrate
vOTU-72531	DP193__10611	Metaviridae	-	environment
vOTU-9911	DP031__945	Metaviridae	-	environment
vOTU-64908	DP189__34932	Retroviridae	Human endogenous retrovirus K	vertebrate
vOTU-78661	DP201__2666	Retroviridae	Human endogenous retrovirus W	vertebrate
vOTU-22028	DP088__12492	Retroviridae	Bat gammaretrovirus	vertebrate
vOTU-84876	DP226__1216	Leviviridae	Leviviridae sp.	bacterium
vOTU-33146	DP125__1870	Retroviridae	-	vertebrate
vOTU-10682	DP057__13	Retroviridae	Bat gammaretrovirus	vertebrate
vOTU-4707	DP007__5702	Coronaviridae	Severe acute respiratory syndrome-related coronavirus	vertebrate
vOTU-64543	DP189__33502	Retroviridae	Walleye epidermal hyperplasia virus 2	vertebrate
vOTU-81401	DP210__3087	Togaviridae	-	plant
vOTU-45989	DP158__14737	Metaviridae	-	environment
vOTU-55539	DP188__1386	Retroviridae	Equine foamy virus	vertebrate
vOTU-76059	DP193__27619	Retroviridae	Porcine type-C oncovirus	vertebrate
vOTU-54840	DP184__478	Cystoviridae	Cystoviridae sp.	invertebrate
vOTU-59309	DP189__13740	Retroviridae	Human endogenous retrovirus K	vertebrate
vOTU-38450	DP129__9234	Retroviridae	Human endogenous retrovirus W	vertebrate
vOTU-42396	DP149__2671	Retroviridae	Human endogenous retrovirus K	vertebrate
vOTU-17374	DP059__659	Cystoviridae	Cystoviridae sp.	invertebrate
vOTU-75359	DP193__24206	Retroviridae	Human endogenous retrovirus K	vertebrate
vOTU-9520	DP010__4418	Retroviridae	Feline leukemia virus	vertebrate
vOTU-9047	DP010__1971	Flaviviridae	Hepacivirus C	vertebrate
vOTU-53600	DP170__405	Metaviridae	-	plant
vOTU-45393	DP158__9701	Metaviridae	-	plant
vOTU-38187	DP129__8084	Retroviridae	Porcine type-C oncovirus	vertebrate
vOTU-17479	DP078__273	Metaviridae	-	environment
vOTU-35085	DP125__9654	Retroviridae	Walleye epidermal hyperplasia virus 2	vertebrate
vOTU-63721	DP189__30403	Retroviridae	Human endogenous retrovirus	vertebrate
vOTU-49552	DP162__277	Metaviridae	-	environment
vOTU-55861	DP189__1126	Retroviridae	Atlantic salmon swim bladder sarcoma virus	vertebrate
vOTU-85043	DP227__3035	Retroviridae	Rhinella marina endogenous retrovirus	vertebrate
vOTU-80668	DP209__2033	Dicistroviridae	Plasmopara viticola lesion associated dicistro-like virus 1	fungus
vOTU-26214	DP095__7979	Cystoviridae	Cystoviridae sp.	invertebrate
vOTU-33825	DP125__4668	Retroviridae	-	vertebrate
vOTU-30553	DP117__2602	Retroviridae	Human endogenous retrovirus W	vertebrate
vOTU-45827	DP158__13354	Retroviridae	Walleye epidermal hyperplasia virus 2	vertebrate
vOTU-54557	DP180__1069	Totiviridae	Totiviridae sp.	environment
vOTU-53406	DP166__7024	Cystoviridae	Cystoviridae sp.	invertebrate
vOTU-41512	DP141__28	Leviviridae	Leviviridae sp.	bacterium
vOTU-30993	DP117__5726	Cystoviridae	Cystoviridae sp.	invertebrate
vOTU-32475	DP123__889	Totiviridae	Totiviridae sp.	environment
vOTU-74069	DP193__17904	Retroviridae	Porcine type-C oncovirus	vertebrate
vOTU-44244	DP157__773	Totiviridae	Totiviridae sp.	environment
vOTU-10157	DP047__209	Metaviridae	-	environment
vOTU-34382	DP125__6903	Retroviridae	Feline leukemia virus	vertebrate
vOTU-47664	DP158__29145	Metaviridae	-	invertebrate
vOTU-47047	DP158__23904	Metaviridae	-	environment
vOTU-8788	DP010__647	Cystoviridae	Cystoviridae sp.	invertebrate
vOTU-84151	DP222__1304	Cystoviridae	Cystoviridae sp.	invertebrate
vOTU-46252	DP158__17049	Metaviridae	-	environment
vOTU-44346	DP158__192	Pseudoviridae	Penicillium camemberti virus - GP1	fungus
vOTU-44678	DP158__2993	Metaviridae	-	environment
vOTU-46035	DP158__15109	Metaviridae	-	environment
vOTU-32648	DP124__1992	Coronaviridae	Human coronavirus HKU1	vertebrate
vOTU-48047	DP158__32766	Pseudoviridae	Penicillium camemberti virus - GP1	fungus
vOTU-44621	DP158__2542	Metaviridae	-	environment
vOTU-72002	DP193__7990	Retroviridae	Human endogenous retrovirus K	vertebrate
vOTU-46624	DP158__20256	Metaviridae	-	environment
vOTU-25948	DP095__4512	Totiviridae	Totiviridae sp.	environment
vOTU-66066	DP189__39196	Retroviridae	Human endogenous retrovirus W	vertebrate
vOTU-54041	DP175__2456	Dicistroviridae	Plasmopara viticola lesion associated dicistro-like virus 1	fungus
vOTU-47754	DP158__29967	Metaviridae	-	environment
vOTU-49448	DP161__4546	Retroviridae	Feline immunodeficiency virus	vertebrate
vOTU-54033	DP175__1893	Totiviridae	Totiviridae sp.	environment
vOTU-53736	DP171__3377	Metaviridae	-	environment
vOTU-82706	DP213__2897	Potyviridae	Telfairia mosaic virus	plant
vOTU-80520	DP208__3535	Retroviridae	Feline immunodeficiency virus	vertebrate
vOTU-30839	DP117__4593	Metaviridae	-	invertebrate
vOTU-4991	DP007__6719	Picornaviridae	Enterovirus B	vertebrate
vOTU-2216	DP006__2894	Cystoviridae	Cystoviridae sp.	invertebrate
vOTU-80228	DP205__5002	Retroviridae	Snakehead retrovirus	vertebrate
vOTU-16971	DP058__5579	Cystoviridae	Cystoviridae sp.	invertebrate
vOTU-81387	DP210__2853	Cystoviridae	Cystoviridae sp.	invertebrate
vOTU-47388	DP158__26668	Metaviridae	-	invertebrate
vOTU-81244	DP210__740	Metaviridae	-	environment
vOTU-77921	DP199__841	Retroviridae	Primate T-lymphotropic virus 1	vertebrate
vOTU-45722	DP158__12506	Pseudoviridae	Penicillium camemberti virus - GP1	fungus
vOTU-52329	DP165__769	Cystoviridae	Cystoviridae sp.	invertebrate
vOTU-29339	DP099__3967	Picornaviridae	Enterovirus B	vertebrate
vOTU-80903	DP209__5809	Totiviridae	Totiviridae sp.	environment
vOTU-46160	DP158__16257	Metaviridae	-	environment
vOTU-13697	DP057__11141	Cystoviridae	Cystoviridae sp.	invertebrate
vOTU-43758	DP151__615	Retroviridae	Walleye epidermal hyperplasia virus 2	vertebrate
vOTU-19051	DP082__3533	Metaviridae	-	environment
vOTU-3229	DP006__10012	Betaflexiviridae	Humulus lupulus citrivirus 1	plant
vOTU-1564	DP005__343	Togaviridae	Eastern equine encephalitis virus	vertebrate
vOTU-84955	DP227__487	Retroviridae	Feline immunodeficiency virus	vertebrate
vOTU-26696	DP095__14112	Metaviridae	-	environment
vOTU-82635	DP213__190	Totiviridae	Totiviridae sp.	environment
vOTU-73312	DP193__14397	Cystoviridae	Cystoviridae sp.	invertebrate
vOTU-81990	DP212__374	Retroviridae	Rhinella marina endogenous retrovirus	vertebrate
vOTU-8344	DP009__1625	Retroviridae	Jaagsiekte sheep retrovirus	vertebrate
vOTU-3014	DP006__8508	Retroviridae	Human endogenous retrovirus W	vertebrate
vOTU-48333	DP159__1662	Totiviridae	Totiviridae sp.	environment
vOTU-46716	DP158__21024	Metaviridae	-	environment
vOTU-25109	DP091__894	Metaviridae	-	plant
vOTU-84176	DP222__2031	Metaviridae	-	environment
vOTU-52575	DP165__7698	Metaviridae	-	environment
vOTU-10345	DP049__1213	Leviviridae	Leviviridae sp.	bacterium
vOTU-8229	DP008__4138	Metaviridae	-	environment
vOTU-52422	DP165__3523	Metaviridae	-	environment
vOTU-45083	DP158__6781	Metaviridae	-	environment
vOTU-17089	DP058__6318	Metaviridae	-	environment
vOTU-10583	DP053__556	Flaviviridae	Hepacivirus C	vertebrate
vOTU-83827	DP221__794	Cystoviridae	Cystoviridae sp.	invertebrate
vOTU-53113	DP166__4553	Dicistroviridae	Plasmopara viticola lesion associated dicistro-like virus 1	fungus
vOTU-54346	DP176__2426	Togaviridae	-	environment
vOTU-1713	DP005__1374	Potyviridae	Iris mild mosaic virus	plant
vOTU-8331	DP009__1266	Totiviridae	Totiviridae sp.	environment
vOTU-45580	DP158__11409	Metaviridae	-	invertebrate
vOTU-10400	DP049__2436	Totiviridae	Totiviridae sp.	environment
vOTU-82642	DP213__746	Leviviridae	Leviviridae sp.	bacterium
vOTU-52343	DP165__981	Retroviridae	Caprine arthritis encephalitis virus	vertebrate
vOTU-44165	DP156__111	Metaviridae	-	plant
vOTU-9820	DP026__296	Retroviridae	Primate T-lymphotropic virus 1	vertebrate
vOTU-34587	DP125__7686	Retroviridae	Feline immunodeficiency virus	vertebrate
vOTU-45963	DP158__14492	Metaviridae	-	environment
vOTU-47873	DP158__31083	Totiviridae	Totiviridae sp.	environment
vOTU-36577	DP129__1588	Retroviridae	Human endogenous retrovirus K	vertebrate
vOTU-49297	DP161__1820	Leviviridae	Leviviridae sp.	bacterium
vOTU-82913	DP217__2523	Retroviridae	Feline immunodeficiency virus	vertebrate
vOTU-38980	DP129__11395	Retroviridae	Human endogenous retrovirus	vertebrate
vOTU-25511	DP091__5759	Metaviridae	-	plant
vOTU-54789	DP183__78	Totiviridae	Totiviridae sp.	environment
vOTU-84887	DP226__1772	Totiviridae	Totiviridae sp.	environment
vOTU-25777	DP095__2434	Pseudoviridae	Penicillium camemberti virus - GP1	fungus
vOTU-18795	DP081__7713	Totiviridae	Totiviridae sp.	environment
vOTU-53281	DP166__5969	Metaviridae	-	invertebrate
vOTU-54426	DP177__1178	Cystoviridae	Cystoviridae sp.	invertebrate
vOTU-47032	DP158__23783	Metaviridae	-	environment
vOTU-37778	DP129__6353	Retroviridae	Human endogenous retrovirus	vertebrate
vOTU-79967	DP205__3714	Retroviridae	Galidia ERV	vertebrate
vOTU-79239	DP205__231	Totiviridae	Totiviridae sp.	environment
vOTU-556	DP003__3672	Retroviridae	Feline immunodeficiency virus	vertebrate
vOTU-40669	DP129__18617	Retroviridae	Primate T-lymphotropic virus 1	vertebrate
vOTU-44872	DP158__4855	Pseudoviridae	Penicillium camemberti virus - GP1	fungus
vOTU-45969	DP158__14573	Retroviridae	Caprine arthritis encephalitis virus	vertebrate
vOTU-53701	DP171__2291	Retroviridae	Feline immunodeficiency virus	vertebrate
vOTU-46809	DP158__21891	Metaviridae	-	environment
vOTU-1686	DP005__1222	Retroviridae	Atlantic salmon swim bladder sarcoma virus	vertebrate
vOTU-44685	DP158__3046	Pseudoviridae	Penicillium camemberti virus - GP1	fungus
vOTU-18738	DP081__7290	Retroviridae	Human endogenous retrovirus	vertebrate
vOTU-49383	DP161__3387	Totiviridae	Totiviridae sp.	environment
vOTU-48689	DP160__5299	Retroviridae	Feline immunodeficiency virus	vertebrate
vOTU-53599	DP170__376	Totiviridae	Totiviridae sp.	environment
vOTU-48220	DP158__34185	Metaviridae	-	environment
vOTU-49706	DP162__1289	Retroviridae	Feline immunodeficiency virus	vertebrate
vOTU-26469	DP095__11250	Retroviridae	Feline immunodeficiency virus	vertebrate
vOTU-47830	DP158__30683	Metaviridae	-	environment
vOTU-17427	DP060__1756	Metaviridae	-	invertebrate
vOTU-2378	DP006__3896	Coronaviridae	Human coronavirus HKU1	vertebrate
vOTU-9364	DP010__3654	Togaviridae	-	environment
vOTU-45524	DP158__10803	Metaviridae	-	plant
vOTU-43714	DP150__356	Retroviridae	Galidia ERV	vertebrate
vOTU-48108	DP158__33192	Metaviridae	-	environment
vOTU-1615	DP005__759	Totiviridae	Totiviridae sp.	environment
vOTU-45402	DP158__9807	Metaviridae	-	environment
vOTU-78816	DP202__1699	Retroviridae	Feline immunodeficiency virus	vertebrate
vOTU-83916	DP221__2825	Totiviridae	Totiviridae sp.	environment
vOTU-70936	DP193__2902	Retroviridae	Human endogenous retrovirus W	vertebrate
vOTU-84275	DP224__2	Retroviridae	Hervey pteropid gammaretrovirus	vertebrate
vOTU-53836	DP173__4	Metaviridae	-	plant
vOTU-26169	DP095__7447	Metaviridae	-	environment
vOTU-44874	DP158__4862	Metaviridae	-	environment
vOTU-47447	DP158__27148	Metaviridae	-	environment
vOTU-65171	DP189__35858	Retroviridae	-	vertebrate
vOTU-70808	DP193__2399	Cystoviridae	Cystoviridae sp.	invertebrate
vOTU-63743	DP189__30486	Retroviridae	Human endogenous retrovirus	vertebrate
vOTU-25479	DP091__5490	Retroviridae	Squirrel monkey retrovirus	vertebrate
vOTU-26586	DP095__12640	Closteroviridae	Grapevine leafroll-associated virus 1	plant
vOTU-52377	DP165__2108	Totiviridae	Totiviridae sp.	environment
vOTU-46633	DP158__20358	Metaviridae	-	environment
vOTU-17755	DP078__4954	Metaviridae	-	plant
vOTU-13474	DP057__10331	Betaflexiviridae	Cherry twisted leaf associated virus	plant
vOTU-81874	DP211__2161	Metaviridae	-	environment
vOTU-25326	DP091__3523	Retroviridae	-	environment
vOTU-84194	DP222__2436	Cystoviridae	Cystoviridae sp.	invertebrate
vOTU-49469	DP161__5018	Chrysoviridae	Fusarium graminearum chrysovirus	fungus
vOTU-46571	DP158__19900	Retroviridae	Porcine type-C oncovirus	vertebrate
vOTU-71	DP003__202	Retroviridae	Human endogenous retrovirus	vertebrate
vOTU-84839	DP226__234	Retroviridae	Feline immunodeficiency virus	vertebrate
vOTU-2282	DP006__3282	Betaflexiviridae	Actinidia virus C	plant
vOTU-30414	DP117__1550	Retroviridae	Human endogenous retrovirus W	vertebrate
vOTU-78624	DP201__2265	Metaviridae	-	environment
vOTU-72229	DP193__9055	Retroviridae	Galidia ERV	vertebrate
vOTU-17296	DP058__7588	Totiviridae	Totiviridae sp.	environment
vOTU-25141	DP091__1260	Retroviridae	Feline immunodeficiency virus	vertebrate
vOTU-47377	DP158__26531	Metaviridae	-	environment
vOTU-31280	DP117__7790	Retroviridae	Feline immunodeficiency virus	vertebrate
vOTU-17248	DP058__7317	Retroviridae	Feline immunodeficiency virus	vertebrate
vOTU-49089	DP160__11609	Retroviridae	Human endogenous retrovirus K	vertebrate
vOTU-52232	DP164__2512	Leviviridae	Leviviridae sp.	bacterium
vOTU-11608	DP057__3362	Retroviridae	Human endogenous retrovirus W	vertebrate
vOTU-10332	DP049__1035	Leviviridae	Leviviridae sp.	bacterium
vOTU-11601	DP057__3348	Retroviridae	Human endogenous retrovirus W	vertebrate
vOTU-77239	DP198__962	Pseudoviridae	Penicillium camemberti virus - GP1	bacterium
vOTU-67468	DP189__44399	Retroviridae	Bat gammaretrovirus	vertebrate
vOTU-72276	DP193__9277	Retroviridae	Human endogenous retrovirus K	vertebrate
vOTU-52586	DP165__8024	Retroviridae	Rhinella marina endogenous retrovirus	vertebrate
vOTU-8601	DP009__6644	Retroviridae	Feline immunodeficiency virus	vertebrate
vOTU-39833	DP129__15058	Retroviridae	Atlantic salmon swim bladder sarcoma virus	vertebrate
vOTU-8325	DP009__1154	Totiviridae	Totiviridae sp.	environment
vOTU-3194	DP006__9750	Retroviridae	Human endogenous retrovirus K	vertebrate
vOTU-53832	DP172__1780	Totiviridae	Totiviridae sp.	environment
vOTU-855	DP003__5837	Cystoviridae	Cystoviridae sp.	invertebrate
vOTU-45805	DP158__13150	Metaviridae	-	invertebrate
vOTU-41510	DP132__3477	Betaflexiviridae	Stevia carlavirus 1	plant
vOTU-81603	DP210__5751	Metaviridae	-	environment
vOTU-49322	DP161__2258	Totiviridae	Totiviridae sp.	environment
vOTU-51930	DP164__774	Metaviridae	-	plant
vOTU-51016	DP163__5431	Retroviridae	Human endogenous retrovirus K	vertebrate
vOTU-81653	DP210__6484	Totiviridae	Totiviridae sp.	environment
vOTU-32518	DP124__199	Alphaflexiviridae	Shallot virus X	plant
vOTU-77280	DP198__1484	Retroviridae	-	environment
vOTU-10433	DP052__789	Retroviridae	Bovine leukemia virus	vertebrate
vOTU-45045	DP158__6472	Metaviridae	-	environment
vOTU-49244	DP161__808	Closteroviridae	Grapevine leafroll-associated virus 1	plant
vOTU-82828	DP216__554	Retroviridae	-	environment
vOTU-84966	DP227__958	Retroviridae	Reticuloendotheliosis virus	vertebrate
vOTU-32463	DP123__605	Coronaviridae	Human coronavirus HKU1	vertebrate
vOTU-11665	DP057__3584	Retroviridae	Human endogenous retrovirus	vertebrate
vOTU-17702	DP078__4103	Retroviridae	-	vertebrate
vOTU-31	DP002__727	Retroviridae	Primate T-lymphotropic virus 1	vertebrate
vOTU-54611	DP181__1011	Retroviridae	Feline immunodeficiency virus	vertebrate
vOTU-73026	DP193__13079	Retroviridae	Walleye dermal sarcoma virus	vertebrate
vOTU-33528	DP125__3399	Retroviridae	Porcine type-C oncovirus	vertebrate
vOTU-81404	DP210__3111	Metaviridae	-	plant
vOTU-54871	DP184__1167	Cystoviridae	Cystoviridae sp.	invertebrate
vOTU-77524	DP198__4150	Leviviridae	Leviviridae sp.	bacterium
vOTU-70245	DP192__4223	Retroviridae	Feline immunodeficiency virus	vertebrate
vOTU-46979	DP158__23346	Cystoviridae	Pectobacterium phage MA14	bacterium
vOTU-25071	DP091__482	Betaflexiviridae	Grapevine virus A	plant
vOTU-19033	DP082__2158	Closteroviridae	Grapevine leafroll-associated virus 1	plant
vOTU-84191	DP222__2372	Totiviridae	Totiviridae sp.	environment
vOTU-75553	DP193__25112	Retroviridae	Puma lentivirus	vertebrate
vOTU-45118	DP158__7054	Metaviridae	-	environment
vOTU-2705	DP006__6244	Retroviridae	Porcine type-C oncovirus	vertebrate
vOTU-80509	DP208__2038	Retroviridae	Feline immunodeficiency virus	vertebrate
vOTU-31371	DP119__436	Metaviridae	-	plant
vOTU-78206	DP200__2031	Retroviridae	Feline immunodeficiency virus	vertebrate
vOTU-32627	DP124__1764	Totiviridae	Totiviridae sp.	environment
vOTU-55412	DP186__4593	Secoviridae	Black raspberry necrosis virus	plant
vOTU-19121	DP082__7632	Retroviridae	Spider monkey simian foamy virus	vertebrate
vOTU-26313	DP095__9330	Retroviridae	Primate T-lymphotropic virus 1	vertebrate
vOTU-49327	DP161__2341	Retroviridae	Feline immunodeficiency virus	vertebrate
vOTU-41631	DP145__408	Metaviridae	-	environment
vOTU-47633	DP158__28817	Metaviridae	-	environment
vOTU-83398	DP218__3204	Retroviridae	Human endogenous retrovirus	vertebrate
vOTU-73222	DP193__14004	Retroviridae	Human endogenous retrovirus K	vertebrate
vOTU-83635	DP220__2117	Retroviridae	Human endogenous retrovirus	vertebrate
vOTU-57154	DP189__5711	Retroviridae	Human endogenous retrovirus K	vertebrate
vOTU-53757	DP171__3920	Metaviridae	-	environment
vOTU-57981	DP189__8731	Retroviridae	Human endogenous retrovirus K	vertebrate
vOTU-54488	DP178__1444	Leviviridae	Leviviridae sp.	bacterium
vOTU-55162	DP186__1929	Cystoviridae	Cystoviridae sp.	invertebrate
vOTU-81569	DP210__5381	Retroviridae	Feline immunodeficiency virus	vertebrate
vOTU-79707	DP205__2500	Betaflexiviridae	Cherry twisted leaf associated virus	plant
vOTU-19099	DP082__5834	Totiviridae	Totiviridae sp.	environment
vOTU-82871	DP216__1807	Totiviridae	Totiviridae sp.	environment
vOTU-6398	DP007__12179	Retroviridae	Human endogenous retrovirus W	vertebrate
vOTU-41515	DP141__286	Metaviridae	-	plant
vOTU-76630	DP197__1622	Retroviridae	Hervey pteropid gammaretrovirus	vertebrate
vOTU-53983	DP174__411	Retroviridae	Atlantic salmon swim bladder sarcoma virus	vertebrate
vOTU-8658	DP009__7907	Retroviridae	-	vertebrate
vOTU-80738	DP209__3110	Totiviridae	Totiviridae sp.	environment
vOTU-80521	DP208__3550	Totiviridae	Totiviridae sp.	environment
vOTU-46351	DP158__17955	Metaviridae	-	invertebrate
vOTU-52321	DP165__387	Totiviridae	Totiviridae sp.	environment
vOTU-53551	DP168__624	Retroviridae	Feline immunodeficiency virus	vertebrate
vOTU-78831	DP202__1835	Metaviridae	-	environment
vOTU-41677	DP147__454	Leviviridae	Leviviridae sp.	bacterium
vOTU-8591	DP009__6554	Retroviridae	-	environment
vOTU-81365	DP210__2530	Metaviridae	-	plant
vOTU-45913	DP158__14061	Pseudoviridae	Penicillium camemberti virus - GP1	bacterium
vOTU-3029	DP006__8614	Partitiviridae	Partitiviridae sp.	plant
vOTU-53546	DP168__576	Metaviridae	-	plant
vOTU-17769	DP078__5211	Retroviridae	Rhinella marina endogenous retrovirus	vertebrate
vOTU-8445	DP009__3651	Retroviridae	Caprine arthritis encephalitis virus	vertebrate
vOTU-8983	DP010__1659	Metaviridae	-	environment
vOTU-30990	DP117__5719	Retroviridae	Human endogenous retrovirus W	vertebrate
vOTU-82767	DP215__495	Totiviridae	Totiviridae sp.	environment
vOTU-7135	DP007__15085	Retroviridae	Human endogenous retrovirus K	vertebrate
vOTU-25970	DP095__4878	Metaviridae	-	environment
vOTU-78001	DP200__571	Leviviridae	Leviviridae sp.	bacterium
vOTU-5228	DP007__7682	Retroviridae	Human endogenous retrovirus K	vertebrate
vOTU-450	DP003__2893	Cystoviridae	Cystoviridae sp.	invertebrate
vOTU-47601	DP158__28593	Pseudoviridae	Penicillium camemberti virus - GP1	fungus
vOTU-47430	DP158__26995	Metaviridae	-	environment
vOTU-82588	DP212__4297	Retroviridae	Feline leukemia virus	vertebrate
vOTU-55540	DP188__1491	Retroviridae	Bovine leukemia virus	vertebrate
vOTU-19155	DP086__204	Leviviridae	Leviviridae sp.	bacterium
vOTU-30848	DP117__4648	Metaviridae	-	environment
vOTU-47585	DP158__28424	Metaviridae	-	invertebrate
vOTU-81626	DP210__6033	Metaviridae	-	environment
vOTU-41532	DP142__124	Metaviridae	-	plant
vOTU-76294	DP195__938	Partitiviridae	Partitiviridae sp.	plant
vOTU-30008	DP099__7419	Retroviridae	Human endogenous retrovirus W	vertebrate
vOTU-723	DP003__4937	Metaviridae	-	invertebrate
vOTU-72996	DP193__12935	Retroviridae	Porcine type-C oncovirus	vertebrate
vOTU-15078	DP057__16356	Retroviridae	Walleye dermal sarcoma virus	vertebrate
vOTU-9839	DP026__1019	Leviviridae	Leviviridae sp.	bacterium
vOTU-77464	DP198__3409	Metaviridae	-	plant
vOTU-1369	DP004__2738	Retroviridae	-	environment
vOTU-19081	DP082__4789	Retroviridae	Mouse Intracisternal A-particle	vertebrate
vOTU-48732	DP160__5963	Retroviridae	Atlantic salmon swim bladder sarcoma virus	vertebrate
vOTU-55541	DP188__1557	Retroviridae	Feline immunodeficiency virus	vertebrate
vOTU-46347	DP158__17928	Metaviridae	-	environment
vOTU-46887	DP158__22610	Metaviridae	-	invertebrate
vOTU-53642	DP171__770	Totiviridae	Totiviridae sp.	environment
vOTU-36746	DP129__2329	Totiviridae	Totiviridae sp.	environment
vOTU-45718	DP158__12483	Pseudoviridae	Penicillium camemberti virus - GP1	fungus
vOTU-30234	DP117__448	Retroviridae	Human endogenous retrovirus W	vertebrate
vOTU-32787	DP125__507	Retroviridae	Human endogenous retrovirus H	vertebrate
vOTU-25003	DP089__215	Totiviridae	Totiviridae sp.	environment
vOTU-21732	DP088__11232	Retroviridae	Feline immunodeficiency virus	vertebrate
vOTU-49425	DP161__4104	Totiviridae	Totiviridae sp.	environment
vOTU-82788	DP215__1711	Cystoviridae	Cystoviridae sp.	invertebrate
vOTU-54623	DP181__1204	Metaviridae	-	environment
vOTU-19134	DP082__8260	Retroviridae	Mouse Intracisternal A-particle	vertebrate
vOTU-41651	DP146__341	Leviviridae	Leviviridae sp.	bacterium
vOTU-19095	DP082__5614	Retroviridae	Murine leukemia virus	vertebrate
vOTU-80783	DP209__4218	Metaviridae	-	environment
vOTU-52319	DP165__341	Retroviridae	Jaagsiekte sheep retrovirus	vertebrate
vOTU-41513	DP141__58	Retroviridae	Primate T-lymphotropic virus 1	vertebrate
vOTU-1251	DP004__774	Betaflexiviridae	Cherry twisted leaf associated virus	plant
vOTU-26592	DP095__12720	Leviviridae	Leviviridae sp.	bacterium
vOTU-70249	DP192__4279	Retroviridae	Feline immunodeficiency virus	vertebrate
vOTU-17817	DP081__149	Metaviridae	-	plant
vOTU-45389	DP158__9669	Metaviridae	-	invertebrate
vOTU-44494	DP158__1426	Totiviridae	Totiviridae sp.	environment
vOTU-39105	DP129__11942	Metaviridae	-	environment
vOTU-44908	DP158__5220	Metaviridae	-	environment
vOTU-45191	DP158__7736	Pseudoviridae	Penicillium camemberti virus - GP1	fungus
vOTU-17474	DP078__144	Leviviridae	Leviviridae sp.	bacterium
vOTU-43928	DP154__1038	Cystoviridae	Cystoviridae sp.	invertebrate
vOTU-54042	DP175__2514	Leviviridae	Leviviridae sp.	bacterium
vOTU-45268	DP158__8641	Metaviridae	-	environment
vOTU-44949	DP158__5536	Metaviridae	-	environment
vOTU-63739	DP189__30473	Retroviridae	Human endogenous retrovirus W	vertebrate
vOTU-81360	DP210__2511	Metaviridae	-	environment
vOTU-48373	DP160__516	Betaflexiviridae	Grapevine virus B	vertebrate
vOTU-61791	DP189__23127	Retroviridae	Caprine arthritis encephalitis virus	vertebrate
vOTU-55501	DP187__1790	Totiviridae	Totiviridae sp.	environment
vOTU-19119	DP082__7377	Flaviviridae	Hepacivirus C	vertebrate
vOTU-35716	DP128__1287	Retroviridae	Rhinella marina endogenous retrovirus	vertebrate
vOTU-49140	DP160__12309	Retroviridae	Feline immunodeficiency virus	vertebrate
vOTU-420	DP003__2693	Retroviridae	-	vertebrate
vOTU-17464	DP060__4707	Leviviridae	Leviviridae sp.	bacterium
vOTU-30874	DP117__4816	Leviviridae	Leviviridae sp.	bacterium
vOTU-52529	DP165__6665	Cystoviridae	Pectobacterium phage MA14	bacterium
vOTU-19014	DP082__1028	Retroviridae	Mouse Intracisternal A-particle	vertebrate
vOTU-10281	DP047__1678	Cystoviridae	Cystoviridae sp.	invertebrate
vOTU-25625	DP095__589	Retroviridae	Feline immunodeficiency virus	vertebrate
vOTU-26147	DP095__7299	Totiviridae	Totiviridae sp.	environment
vOTU-44619	DP158__2530	Metaviridae	-	environment
vOTU-83052	DP218__868	Retroviridae	Bovine leukemia virus	vertebrate
vOTU-50014	DP163__639	Cystoviridae	Cystoviridae sp.	invertebrate
vOTU-29333	DP099__3941	Leviviridae	Leviviridae sp.	bacterium
vOTU-78769	DP202__1162	Retroviridae	Walleye epidermal hyperplasia virus 2	vertebrate
vOTU-37185	DP129__4037	Retroviridae	Feline immunodeficiency virus	vertebrate
vOTU-77899	DP199__115	Cystoviridae	Cystoviridae sp.	invertebrate
vOTU-17469	DP078__56	Retroviridae	Feline immunodeficiency virus	vertebrate
vOTU-6593	DP007__12962	Retroviridae	Walleye dermal sarcoma virus	vertebrate
vOTU-53619	DP171__300	Betaflexiviridae	Cherry twisted leaf associated virus	plant
vOTU-48180	DP158__33856	Metaviridae	-	environment
vOTU-8081	DP008__2473	Leviviridae	Leviviridae sp.	bacterium
vOTU-26228	DP095__8124	Metaviridae	-	environment
vOTU-5061	DP007__7019	Retroviridae	Human endogenous retrovirus W	vertebrate
vOTU-79133	DP204__46	Betaflexiviridae	Cherry twisted leaf associated virus	plant
vOTU-82878	DP217__255	Betaflexiviridae	Actinidia virus C	plant
vOTU-78750	DP202__995	Leviviridae	Leviviridae sp.	bacterium
vOTU-14092	DP057__12648	Retroviridae	Human endogenous retrovirus W	vertebrate
vOTU-76891	DP197__3271	Retroviridae	Feline foamy virus	vertebrate
vOTU-44986	DP158__5946	Metaviridae	-	environment
vOTU-45875	DP158__13734	Metaviridae	-	environment
vOTU-55290	DP186__3289	Retroviridae	Bovine leukemia virus	vertebrate
vOTU-36815	DP129__2621	Retroviridae	Human endogenous retrovirus	vertebrate
vOTU-23851	DP088__20328	Retroviridae	Human endogenous retrovirus K	vertebrate
vOTU-8401	DP009__2848	Totiviridae	Totiviridae sp.	environment
vOTU-17391	DP059__1047	Metaviridae	-	plant
vOTU-8397	DP009__2761	Retroviridae	Murine leukemia virus	vertebrate
vOTU-46069	DP158__15400	Totiviridae	Totiviridae sp.	environment
vOTU-71212	DP193__4271	Retroviridae	Human endogenous retrovirus	vertebrate
vOTU-47561	DP158__28194	Retroviridae	Primate T-lymphotropic virus 1	vertebrate
vOTU-52613	DP165__8881	Retroviridae	Feline leukemia virus	vertebrate
vOTU-30149	DP100__1565	Retroviridae	Feline immunodeficiency virus	vertebrate
vOTU-43118	DP149__7095	Metaviridae	-	plant
vOTU-81191	DP209__10051	Totiviridae	Totiviridae sp.	environment
vOTU-47079	DP158__24079	Metaviridae	-	environment
vOTU-72539	DP193__10646	Retroviridae	Human endogenous retrovirus K	vertebrate
vOTU-47634	DP158__28822	Pseudoviridae	Penicillium camemberti virus - GP1	fungus
vOTU-1495	DP004__5122	Coronaviridae	Human coronavirus HKU1	vertebrate
vOTU-39279	DP129__12673	Retroviridae	Mouse mammary tumor virus	vertebrate
vOTU-24546	DP088__23582	Retroviridae	Human endogenous retrovirus K	vertebrate
vOTU-77517	DP198__4073	Metaviridae	-	plant
vOTU-45213	DP158__8056	Metaviridae	-	Invertebrate
vOTU-46640	DP158__20388	Metaviridae	-	environment
vOTU-43751	DP151__373	Cystoviridae	Cystoviridae sp.	invertebrate
vOTU-49286	DP161__1626	Metaviridae	-	environment
vOTU-47921	DP158__31528	Metaviridae	-	invertebrate
vOTU-47027	DP158__23760	Metaviridae	-	environment
vOTU-52371	DP165__1874	Betaflexiviridae	Actinidia virus C	plant
vOTU-68122	DP189__46997	Retroviridae	Human endogenous retrovirus K	vertebrate
vOTU-47941	DP158__31777	Metaviridae	-	invertebrate
vOTU-25054	DP091__366	Cystoviridae	Cystoviridae sp.	invertebrate
vOTU-70697	DP193__1939	Retroviridae	Human endogenous retrovirus K	vertebrate
vOTU-81853	DP211__1765	Totiviridae	Totiviridae sp.	environment
vOTU-58655	DP189__11276	Metaviridae	-	plant
vOTU-42385	DP149__2610	Retroviridae	Human endogenous retrovirus	vertebrate
vOTU-53573	DP169__337	Potyviridae	Iris mild mosaic virus	plant
vOTU-8795	DP010__676	Leviviridae	Leviviridae sp.	bacterium
vOTU-25287	DP091__2985	Totiviridae	Totiviridae sp.	environment
vOTU-41558	DP142__1094	Metaviridae	-	environment
vOTU-50952	DP163__5087	Retroviridae	Mason-Pfizer monkey virus	vertebrate
vOTU-52860	DP166__2278	Retroviridae	Caprine arthritis encephalitis virus	vertebrate
vOTU-83215	DP218__1988	Retroviridae	Human endogenous retrovirus	vertebrate
vOTU-83979	DP221__4114	Leviviridae	Leviviridae sp.	bacterium
vOTU-77923	DP199__888	Leviviridae	Leviviridae sp.	bacterium
vOTU-54758	DP182__1796	Potyviridae	Telfairia mosaic virus	plant
vOTU-43853	DP153__594	Retroviridae	Feline immunodeficiency virus	vertebrate
vOTU-47368	DP158__26476	Metaviridae	-	environment
vOTU-17791	DP078__5639	Betaflexiviridae	Cherry twisted leaf associated virus	plant
vOTU-79175	DP204__1053	Cystoviridae	Cystoviridae sp.	invertebrate
vOTU-17343	DP059__170	Totiviridae	Totiviridae sp.	environment
vOTU-82895	DP217__1394	Totiviridae	Totiviridae sp.	environment
vOTU-55235	DP186__2731	Metaviridae	-	environment
vOTU-16799	DP058__4400	Retroviridae	Human endogenous retrovirus K	vertebrate
vOTU-5282	DP007__7917	Retroviridae	Guenon simian foamy virus	vertebrate
vOTU-21566	DP088__10442	Retroviridae	Porcine type-C oncovirus	vertebrate
vOTU-32442	DP123__290	Retroviridae	Feline immunodeficiency virus	vertebrate
vOTU-1025	DP003__7288	Dicistroviridae	Plasmopara viticola lesion associated dicistro-like virus 1	fungus
vOTU-1144	DP003__8131	Potyviridae	Cassava brown streak virus	plant
vOTU-41	DP002__1030	Retroviridae	Human endogenous retrovirus W	vertebrate
vOTU-56074	DP189__1881	Retroviridae	Human endogenous retrovirus K	vertebrate
vOTU-47786	DP158__30271	Metaviridae	-	environment
vOTU-40199	DP129__16657	Leviviridae	Leviviridae sp.	bacterium
vOTU-40102	DP129__16283	Retroviridae	Porcine type-C oncovirus	vertebrate
vOTU-47045	DP158__23900	Metaviridae	-	invertebrate
vOTU-75960	DP193__27136	Retroviridae	Human endogenous retrovirus	vertebrate
vOTU-10588	DP053__745	Coronaviridae	Bottlenose dolphin coronavirus	vertebrate
vOTU-43774	DP151__1327	Retroviridae	Primate T-lymphotropic virus 1	vertebrate
vOTU-9622	DP010__4858	Retroviridae	Feline immunodeficiency virus	vertebrate
vOTU-42872	DP149__5584	Retroviridae	Human endogenous retrovirus W	vertebrate
vOTU-39764	DP129__14756	Totiviridae	Totiviridae sp.	environment
vOTU-31363	DP119__340	Togaviridae	Eastern equine encephalitis virus	vertebrate
vOTU-80515	DP208__2760	Totiviridae	Totiviridae sp.	environment
vOTU-81642	DP210__6284	Betaflexiviridae	Lettuce chordovirus 1	plant
vOTU-41702	DP147__1335	Metaviridae	-	plant
vOTU-25008	DP089__398	Potyviridae	Iris mild mosaic virus	plant
vOTU-45720	DP158__12495	Metaviridae	-	environment
vOTU-25629	DP095__640	Metaviridae	-	environment
vOTU-10138	DP046__1086	Totiviridae	Totiviridae sp.	environment
vOTU-10579	DP053__382	Totiviridae	Totiviridae sp.	environment
vOTU-23262	DP088__17772	Retroviridae	Walleye dermal sarcoma virus	vertebrate
vOTU-55036	DP186__722	Retroviridae	Bovine retrovirus CH15	vertebrate
vOTU-8881	DP010__1137	Cystoviridae	Cystoviridae sp.	invertebrate
vOTU-45705	DP158__12347	Metaviridae	-	environment
vOTU-8155	DP008__3298	Picornaviridae	Bat sapelovirus	vertebrate
vOTU-1471	DP004__4795	Leviviridae	Leviviridae sp.	bacterium
vOTU-41657	DP146__723	Retroviridae	Primate T-lymphotropic virus 1	vertebrate
vOTU-66296	DP189__40053	Retroviridae	Human endogenous retrovirus W	vertebrate
vOTU-913	DP003__6282	Totiviridae	Totiviridae sp.	environment
vOTU-16959	DP058__5496	Retroviridae	Human endogenous retrovirus K	vertebrate
vOTU-47985	DP158__32187	Metaviridae	-	environment
vOTU-47246	DP158__25411	Metaviridae	-	environment
vOTU-16134	DP058__564	Metaviridae	-	environment
vOTU-7279	DP007__15596	Retroviridae	Human endogenous retrovirus K	vertebrate
vOTU-69704	DP191__4394	Totiviridae	Totiviridae sp.	environment
vOTU-10369	DP049__1677	Pseudoviridae	Penicillium camemberti virus - GP1	fungus
vOTU-10079	DP042__296	Betaflexiviridae	Actinidia virus C	plant
vOTU-84672	DP224__2670	Leviviridae	Leviviridae sp.	bacterium
vOTU-77758	DP198__6546	Retroviridae	Human endogenous retrovirus K	vertebrate
vOTU-81232	DP210__585	Retroviridae	Murine leukemia virus	vertebrate
vOTU-45087	DP158__6813	Pseudoviridae	Penicillium camemberti virus - GP1	fungus
vOTU-25001	DP089__126	Coronaviridae	Bottlenose dolphin coronavirus	vertebrate
vOTU-8576	DP009__6255	Totiviridae	Totiviridae sp.	environment
vOTU-54515	DP179__1093	Cystoviridae	Cystoviridae sp.	invertebrate
vOTU-25401	DP091__4476	Cystoviridae	Cystoviridae sp.	invertebrate
vOTU-20922	DP088__7593	Retroviridae	Equine foamy virus	vertebrate
vOTU-44384	DP158__553	Metaviridae	-	invertebrate
vOTU-51322	DP163__6831	Retroviridae	Walleye epidermal hyperplasia virus 2	vertebrate
vOTU-68226	DP189__47341	Retroviridae	Murine leukemia virus	vertebrate
vOTU-1727	DP005__1476	Picornaviridae	Enterovirus A	vertebrate
vOTU-65006	DP189__35269	Retroviridae	Human endogenous retrovirus W	vertebrate
vOTU-25035	DP091__161	Leviviridae	Leviviridae sp.	bacterium
vOTU-45144	DP158__7261	Metaviridae	-	invertebrate
vOTU-81397	DP210__3025	Metaviridae	-	invertebrate
vOTU-52251	DP164__2636	Dicistroviridae	Plasmopara viticola lesion associated dicistro-like virus 1	fungus
vOTU-5133	DP007__7321	Retroviridae	Human endogenous retrovirus K	vertebrate
vOTU-18556	DP081__5839	Rhabdoviridae	Wheat rosette stunt virus	plant
vOTU-13090	DP057__8913	Cystoviridae	Cystoviridae sp.	invertebrate
vOTU-83888	DP221__2083	Coronaviridae	Severe acute respiratory syndrome-related coronavirus	vertebrate
vOTU-84161	DP222__1586	Retroviridae	Feline immunodeficiency virus	vertebrate
vOTU-49300	DP161__1842	Leviviridae	Leviviridae sp.	bacterium
vOTU-19958	DP088__3369	Retroviridae	Equine foamy virus	vertebrate
vOTU-17546	DP078__1407	Retroviridae	-	vertebrate
vOTU-80369	DP206__532	Partitiviridae	Partitiviridae sp.	plant
vOTU-32480	DP123__977	Totiviridae	Totiviridae sp.	environment
vOTU-46384	DP158__18177	Metaviridae	-	plant
vOTU-26801	DP095__15556	Retroviridae	Rhinella marina endogenous retrovirus	vertebrate
vOTU-19105	DP082__6550	Coronaviridae	Bottlenose dolphin coronavirus	vertebrate
vOTU-120	DP003__604	Retroviridae	Puma lentivirus	vertebrate
vOTU-69082	DP190__385	Cystoviridae	Cystoviridae sp.	invertebrate
vOTU-41876	DP148__1741	Totiviridae	Totiviridae sp.	environment
vOTU-82775	DP215__855	Cystoviridae	Cystoviridae sp.	invertebrate
vOTU-42973	DP149__6201	Totiviridae	Totiviridae sp.	environment
vOTU-84074	DP221__5987	Leviviridae	Leviviridae sp.	bacterium
vOTU-7113	DP007__15012	Retroviridae	Human endogenous retrovirus K	vertebrate
vOTU-84048	DP221__5481	Totiviridae	Totiviridae sp.	environment
vOTU-49081	DP160__11422	Totiviridae	Totiviridae sp.	environment
vOTU-76707	DP197__2047	Cystoviridae	Cystoviridae sp.	invertebrate
vOTU-70757	DP193__2201	Retroviridae	-	vertebrate
vOTU-76357	DP196__1253	Totiviridae	Totiviridae sp.	environment
vOTU-32483	DP123__1027	Leviviridae	Leviviridae sp.	bacterium
vOTU-18970	DP081__9093	Retroviridae	Human endogenous retrovirus K	vertebrate
vOTU-48248	DP158__34340	Metaviridae	-	environment
vOTU-9729	DP010__5339	Metaviridae	-	plant
vOTU-82785	DP215__1624	Metaviridae	-	plant
vOTU-69079	DP190__294	Retroviridae	Human endogenous retrovirus	vertebrate
vOTU-46054	DP158__15304	Metaviridae	-	environment
vOTU-48801	DP160__6892	Cystoviridae	Cystoviridae sp.	invertebrate
vOTU-27381	DP098__1805	Retroviridae	Gibbon ape leukemia virus	vertebrate
vOTU-34359	DP125__6841	Retroviridae	Equine foamy virus	vertebrate
vOTU-70056	DP192__530	Metaviridae	-	environment
vOTU-45994	DP158__14783	Metaviridae	-	environment
vOTU-20323	DP088__4912	Retroviridae	Human endogenous retrovirus W	vertebrate
vOTU-10139	DP046__1230	Retroviridae	Primate T-lymphotropic virus 1	vertebrate
vOTU-36247	DP129__253	Retroviridae	Human endogenous retrovirus W	vertebrate
vOTU-7278	DP007__15593	Retroviridae	Reticuloendotheliosis virus	vertebrate
vOTU-35773	DP128__1662	Betaflexiviridae	Actinidia virus C	plant
vOTU-44394	DP158__620	Retroviridae	Human endogenous retrovirus W	vertebrate
vOTU-45182	DP158__7675	Retroviridae	Gunnison's prairie dog retrovirus	vertebrate
vOTU-41101	DP132__1018	Retroviridae	Feline immunodeficiency virus	vertebrate
vOTU-47034	DP158__23809	Metaviridae	-	invertebrate
vOTU-13674	DP057__11063	Retroviridae	Human endogenous retrovirus W	vertebrate
vOTU-13015	DP057__8638	Retroviridae	Human endogenous retrovirus K	vertebrate
vOTU-23508	DP088__18743	Retroviridae	-	vertebrate
vOTU-80455	DP207__893	Retroviridae	Feline immunodeficiency virus	vertebrate
vOTU-53514	DP167__959	Retroviridae	Rhinella marina endogenous retrovirus	vertebrate
vOTU-46302	DP158__17532	Retroviridae	Feline immunodeficiency virus	vertebrate
vOTU-55471	DP187__1112	Closteroviridae	Grapevine leafroll-associated virus 6	plant
vOTU-46691	DP158__20839	Pseudoviridae	Penicillium camemberti virus - GP1	fungus
vOTU-17757	DP078__4990	Cystoviridae	Cystoviridae sp.	invertebrate
vOTU-44363	DP158__338	Metaviridae	-	invertebrate
vOTU-8767	DP010__528	Metaviridae	-	environment
vOTU-46507	DP158__19287	Metaviridae	-	environment
vOTU-10104	DP042__1297	Cystoviridae	Cystoviridae sp.	invertebrate
vOTU-51109	DP163__5897	Cystoviridae	Cystoviridae sp.	invertebrate
vOTU-41567	DP143__342	Cystoviridae	Cystoviridae sp.	invertebrate
vOTU-17624	DP078__2616	Coronaviridae	Pipistrellus bat coronavirus HKU5	vertebrate
vOTU-17439	DP060__2578	Totiviridae	Totiviridae sp.	environment
vOTU-1520	DP005__28	Flaviviridae	Hepacivirus C	vertebrate
vOTU-77616	DP198__5229	Retroviridae	Murine leukemia virus	vertebrate
vOTU-76288	DP195__742	Retroviridae	Rhinella marina endogenous retrovirus	vertebrate
vOTU-44350	DP158__237	Metaviridae	-	environment
vOTU-65568	DP189__37291	Retroviridae	Human endogenous retrovirus W	vertebrate
vOTU-5169	DP007__7449	Retroviridae	Melomys burtoni retrovirus	vertebrate
vOTU-69137	DP190__1439	Cystoviridae	Cystoviridae sp.	invertebrate
vOTU-1841	DP006__354	Leviviridae	Leviviridae sp.	bacterium
vOTU-49066	DP160__11235	Retroviridae	Feline endogenous virus	vertebrate
vOTU-2107	DP006__2201	Retroviridae	Human endogenous retrovirus K	vertebrate
vOTU-82783	DP215__1528	Closteroviridae	Grapevine leafroll-associated virus 1	plant
vOTU-69148	DP190__1671	Cystoviridae	Cystoviridae sp.	invertebrate
vOTU-74206	DP193__18586	Retroviridae	Primate T-lymphotropic virus 1	vertebrate
vOTU-25176	DP091__1773	Leviviridae	Leviviridae sp.	bacterium
vOTU-37192	DP129__4057	Retroviridae	Gunnison's prairie dog retrovirus	vertebrate
vOTU-25081	DP091__610	Retroviridae	Feline immunodeficiency virus	vertebrate
vOTU-81330	DP210__2030	Metaviridae	-	environment
vOTU-48641	DP160__4644	Retroviridae	Rhinella marina endogenous retrovirus	vertebrate
vOTU-81549	DP210__5157	Pseudoviridae	Penicillium camemberti virus - GP1	fungus
vOTU-45394	DP158__9703	Metaviridae	-	invertebrate
vOTU-82199	DP212__1720	Totiviridae	Totiviridae sp.	environment
vOTU-81437	DP210__3537	Metaviridae	-	plant
vOTU-34416	DP125__7057	Retroviridae	-	vertebrate
vOTU-70054	DP192__489	Leviviridae	Leviviridae sp.	bacterium
vOTU-43723	DP150__662	Cystoviridae	Cystoviridae sp.	invertebrate
vOTU-83867	DP221__1695	Cystoviridae	Cystoviridae sp.	invertebrate
vOTU-9817	DP026__219	Leviviridae	Leviviridae sp.	bacterium
vOTU-18443	DP081__4940	Retroviridae	-	environment
vOTU-17740	DP078__4776	Retroviridae	Feline immunodeficiency virus	vertebrate
vOTU-53672	DP171__1521	Metaviridae	-	environment
vOTU-27065	DP098__93	Retroviridae	Human endogenous retrovirus	vertebrate
vOTU-17353	DP059__354	Totiviridae	Totiviridae sp.	environment
vOTU-46918	DP158__22777	Metaviridae	-	environment
vOTU-82723	DP214__151	Retroviridae	Feline immunodeficiency virus	vertebrate
vOTU-76879	DP197__3184	Cystoviridae	Cystoviridae sp.	invertebrate
vOTU-8631	DP009__7506	Totiviridae	Totiviridae sp.	environment
vOTU-48164	DP158__33701	Retroviridae	-	environment
vOTU-67278	DP189__43678	Retroviridae	Galidia ERV	vertebrate
vOTU-46055	DP158__15310	Pseudoviridae	Penicillium camemberti virus - GP1	fungus
vOTU-55545	DP188__1703	Totiviridae	Totiviridae sp.	environment
vOTU-45937	DP158__14298	Pseudoviridae	Penicillium camemberti virus - GP1	fungus
vOTU-80367	DP206__384	Leviviridae	Leviviridae sp.	bacterium
vOTU-83462	DP219__505	Cystoviridae	Cystoviridae sp.	invertebrate
vOTU-48100	DP158__33120	Retroviridae	Human endogenous retrovirus W	vertebrate
vOTU-69127	DP190__1245	Leviviridae	Leviviridae sp.	bacterium
vOTU-54452	DP178__322	Totiviridae	Totiviridae sp.	environment
vOTU-69725	DP191__4574	Totiviridae	Totiviridae sp.	environment
vOTU-84808	DP225__116	Cystoviridae	Cystoviridae sp.	invertebrate
vOTU-55158	DP186__1886	Cystoviridae	Cystoviridae sp.	invertebrate
vOTU-45305	DP158__8976	Metaviridae	-	environment
vOTU-33	DP002__822	Totiviridae	Totiviridae sp.	environment
vOTU-17406	DP059__1399	Cystoviridae	Cystoviridae sp.	invertebrate
vOTU-25602	DP095__335	Pseudoviridae	Penicillium camemberti virus - GP1	fungus
vOTU-71575	DP193__5935	Cystoviridae	Cystoviridae sp.	invertebrate
vOTU-82107	DP212__1172	Retroviridae	Bat gammaretrovirus	vertebrate
vOTU-54506	DP179__818	Cystoviridae	Cystoviridae sp.	invertebrate
vOTU-45519	DP158__10780	Metaviridae	-	invertebrate
vOTU-69813	DP191__5288	Retroviridae	Human endogenous retrovirus W	vertebrate
vOTU-53231	DP166__5529	Totiviridae	Totiviridae sp.	environment
vOTU-1414	DP004__3552	Retroviridae	Human endogenous retrovirus K	vertebrate
vOTU-82889	DP217__574	Retroviridae	Primate T-lymphotropic virus 1	vertebrate
vOTU-3739	DP007__1855	Retroviridae	Human endogenous retrovirus K	vertebrate
vOTU-72030	DP193__8125	Totiviridae	Totiviridae sp.	environment
vOTU-17666	DP078__3232	Retroviridae	Primate T-lymphotropic virus 1	vertebrate
vOTU-45436	DP158__10092	Metaviridae	-	environment
vOTU-60627	DP189__18613	Retroviridae	Walleye epidermal hyperplasia virus 2	vertebrate
vOTU-58931	DP189__12302	Retroviridae	Walleye epidermal hyperplasia virus 2	vertebrate
vOTU-8545	DP009__5683	Totiviridae	Totiviridae sp.	environment
vOTU-34198	DP125__6172	Retroviridae	Human endogenous retrovirus K	vertebrate
vOTU-81902	DP211__2613	Retroviridae	Feline immunodeficiency virus	vertebrate
vOTU-45	DP002__1267	Metaviridae	-	plant
vOTU-50071	DP163__922	Retroviridae	Caprine arthritis encephalitis virus	vertebrate
vOTU-32748	DP125__363	Retroviridae	Galidia ERV	vertebrate
vOTU-78541	DP201__1326	Retroviridae	Human endogenous retrovirus	vertebrate
vOTU-3022	DP006__8579	Retroviridae	Primate T-lymphotropic virus 1	vertebrate
vOTU-45502	DP158__10623	Metaviridae	-	environment
vOTU-75034	DP193__22656	Retroviridae	Human endogenous retrovirus K	vertebrate
vOTU-10589	DP053__800	Togaviridae	Eastern equine encephalitis virus	vertebrate
vOTU-45043	DP158__6451	Metaviridae	-	invertebrate
vOTU-36626	DP129__1817	Retroviridae	Walleye dermal sarcoma virus	vertebrate
vOTU-47318	DP158__26060	Metaviridae	-	environment
vOTU-25593	DP095__185	Retroviridae	Feline leukemia virus	vertebrate
vOTU-55461	DP187__938	Retroviridae	Primate T-lymphotropic virus 1	vertebrate
vOTU-43820	DP152__1589	Leviviridae	Leviviridae sp.	bacterium
vOTU-54844	DP184__605	Retroviridae	Porcine type-C oncovirus	vertebrate
vOTU-36116	DP128__4615	Retroviridae	Porcine type-C oncovirus	vertebrate
vOTU-8457	DP009__3938	Retroviridae	Walleye epidermal hyperplasia virus 1	vertebrate
vOTU-8850	DP010__1007	Togaviridae	-	environment
vOTU-54810	DP183__545	Metaviridae	-	plant
vOTU-6643	DP007__13195	Retroviridae	Walleye dermal sarcoma virus	vertebrate
vOTU-52333	DP165__812	Betaflexiviridae	Garlic yellow stripe associated virus	plant
vOTU-77305	DP198__1802	Cystoviridae	Cystoviridae sp.	invertebrate
vOTU-51820	DP164__134	Retroviridae	Human endogenous retrovirus K	vertebrate
vOTU-80653	DP209__1857	Metaviridae	-	environment
vOTU-54562	DP180__1200	Totiviridae	Totiviridae sp.	environment
vOTU-51920	DP164__702	Totiviridae	Totiviridae sp.	environment
vOTU-53994	DP174__883	Leviviridae	Leviviridae sp.	bacterium
vOTU-84037	DP221__5298	Retroviridae	Feline immunodeficiency virus	vertebrate
vOTU-1277	DP004__1197	Totiviridae	Totiviridae sp.	environment
vOTU-48420	DP160__1446	Retroviridae	Feline immunodeficiency virus	vertebrate
vOTU-47848	DP158__30878	Metaviridae	-	environment
vOTU-78941	DP203__594	Retroviridae	Galidia ERV	vertebrate
vOTU-31297	DP118__1064	Retroviridae	Primate T-lymphotropic virus 1	vertebrate
vOTU-54786	DP183__47	Togaviridae	Eastern equine encephalitis virus	vertebrate
vOTU-52533	DP165__6743	Metaviridae	-	plant
vOTU-39704	DP129__14562	Retroviridae	Human endogenous retrovirus K	vertebrate
vOTU-84831	DP226__75	Totiviridae	Totiviridae sp.	environment
vOTU-11306	DP057__2268	Retroviridae	Feline leukemia virus	vertebrate
vOTU-46821	DP158__21968	Pseudoviridae	Penicillium camemberti virus - GP1	fungus
vOTU-46205	DP158__16610	Metaviridae	-	environment
vOTU-54546	DP180__832	Retroviridae	Feline immunodeficiency virus	vertebrate
vOTU-39509	DP129__13657	Retroviridae	Snakehead retrovirus	vertebrate
vOTU-58696	DP189__11421	Metaviridae	-	environment
vOTU-52340	DP165__942	Leviviridae	Leviviridae sp.	bacterium
vOTU-44869	DP158__4819	Betaflexiviridae	Actinidia virus C	plant
vOTU-82848	DP216__1236	Cystoviridae	Cystoviridae sp.	invertebrate
vOTU-14270	DP057__13325	Retroviridae	Human endogenous retrovirus K	vertebrate
vOTU-40615	DP129__18375	Retroviridae	Human endogenous retrovirus K	vertebrate
vOTU-31597	DP120__1067	Retroviridae	Human endogenous retrovirus W	vertebrate
vOTU-49475	DP161__5148	Retroviridae	Feline immunodeficiency virus	vertebrate
vOTU-81045	DP209__7690	Cystoviridae	Cystoviridae sp.	invertebrate
vOTU-65841	DP189__38266	Retroviridae	Human endogenous retrovirus W	vertebrate
vOTU-47869	DP158__31071	Metaviridae	-	plant
vOTU-5164	DP007__7428	Retroviridae	Murine leukemia virus	vertebrate
vOTU-1039	DP003__7352	Metaviridae	-	environment
vOTU-84399	DP224__887	Retroviridae	Human endogenous retrovirus K	vertebrate
vOTU-47802	DP158__30435	Pseudoviridae	Penicillium camemberti virus - GP1	fungus
vOTU-84826	DP225__1240	Cystoviridae	Cystoviridae sp.	invertebrate
vOTU-41638	DP145__599	Metaviridae	-	plant
vOTU-53594	DP170__319	Totiviridae	Totiviridae sp.	environment
vOTU-1635	DP005__903	Retroviridae	Walleye epidermal hyperplasia virus 2	vertebrate
vOTU-40120	DP129__16352	Retroviridae	Porcine type-C oncovirus	vertebrate
vOTU-53580	DP170__26	Flaviviridae	Hepacivirus C	vertebrate
vOTU-9237	DP010__2974	Totiviridae	Totiviridae sp.	environment
vOTU-17415	DP060__1095	Leviviridae	Leviviridae sp.	bacterium
vOTU-62644	DP189__26269	Retroviridae	Human endogenous retrovirus K	vertebrate
vOTU-30602	DP117__2931	Cystoviridae	Cystoviridae sp.	invertebrate
vOTU-78774	DP202__1211	Retroviridae	Feline immunodeficiency virus	vertebrate
vOTU-52591	DP165__8116	Cystoviridae	Cystoviridae sp.	invertebrate
vOTU-82870	DP216__1769	Metaviridae	-	plant
vOTU-80511	DP208__2415	Leviviridae	Leviviridae sp.	bacterium
vOTU-45296	DP158__8884	Retroviridae	Bovine foamy virus	vertebrate
vOTU-44651	DP158__2820	Metaviridae	-	environment
vOTU-81867	DP211__2089	Cystoviridae	Cystoviridae sp.	invertebrate
vOTU-11194	DP057__1869	Retroviridae	Bat gammaretrovirus	vertebrate
vOTU-44618	DP158__2527	Metaviridae	-	environment
vOTU-27000	DP095__18013	Metaviridae	-	Invertebrate
vOTU-55497	DP187__1712	Closteroviridae	Air potato ampelovirus 1	plant
vOTU-10048	DP040__1034	Retroviridae	Human endogenous retrovirus W	vertebrate
vOTU-84182	DP222__2109	Totiviridae	Totiviridae sp.	environment
vOTU-64431	DP189__33092	Retroviridae	Galidia ERV	vertebrate
vOTU-78731	DP202__708	Metaviridae	-	Invertebrate
vOTU-24062	DP088__21233	Retroviridae	Human endogenous retrovirus W	vertebrate
vOTU-17805	DP081__96	Retroviridae	-	vertebrate
vOTU-10458	DP052__1261	Cystoviridae	Cystoviridae sp.	invertebrate
vOTU-52515	DP165__6089	Retroviridae	Primate T-lymphotropic virus 3	vertebrate
vOTU-84651	DP224__2513	Cystoviridae	Cystoviridae sp.	invertebrate
vOTU-46556	DP158__19789	Metaviridae	-	environment
vOTU-43961	DP154__1952	Retroviridae	Human endogenous retrovirus K	vertebrate
vOTU-47626	DP158__28789	Metaviridae	-	environment
vOTU-82144	DP212__1384	Retroviridae	Human endogenous retrovirus W	vertebrate
vOTU-16724	DP058__4001	Cystoviridae	Cystoviridae sp.	invertebrate
vOTU-47145	DP158__24600	Pseudoviridae	Penicillium camemberti virus - GP1	fungus
vOTU-69216	DP191__314	Totiviridae	Totiviridae sp.	environment
vOTU-19017	DP082__1132	Retroviridae	Endogenous prairie dog retrovirus	vertebrate
vOTU-44754	DP158__3708	Metaviridae	-	environment
vOTU-44885	DP158__4983	Metaviridae	-	invertebrate
vOTU-10496	DP052__2108	Metaviridae	-	Invertebrate
vOTU-32446	DP123__358	Totiviridae	Totiviridae sp.	environment
vOTU-81199	DP210__119	Cystoviridae	Cystoviridae sp.	invertebrate
vOTU-78719	DP202__487	Metaviridae	-	environment
vOTU-47162	DP158__24724	Metaviridae	-	environment
vOTU-76339	DP196__619	Leviviridae	Leviviridae sp.	bacterium
vOTU-55428	DP187__366	Retroviridae	Ovine enzootic nasal tumor virus	vertebrate
vOTU-53449	DP166__7399	Metaviridae	-	environment
vOTU-83322	DP218__2639	Retroviridae	Primate T-lymphotropic virus 1	vertebrate
vOTU-27709	DP098__3545	Retroviridae	Porcine type-C oncovirus	vertebrate
vOTU-83374	DP218__3017	Leviviridae	Leviviridae sp.	bacterium
vOTU-17621	DP078__2591	Cystoviridae	Cystoviridae sp.	invertebrate
vOTU-48845	DP160__7574	Retroviridae	Caprine arthritis encephalitis virus	vertebrate
vOTU-47196	DP158__25034	Closteroviridae	Pistachio ampelovirus A	plant
vOTU-46896	DP158__22654	Metaviridae	-	plant
vOTU-71786	DP193__7014	Retroviridae	Feline immunodeficiency virus	vertebrate
vOTU-10384	DP049__2123	Totiviridae	Totiviridae sp.	environment
vOTU-45100	DP158__6913	Retroviridae	Bornean orangutan simian foamy virus	vertebrate
vOTU-62857	DP189__27095	Retroviridae	Human endogenous retrovirus K	vertebrate
vOTU-77048	DP197__4226	Retroviridae	Human endogenous retrovirus	vertebrate
vOTU-25297	DP091__3120	Cystoviridae	Cystoviridae sp.	invertebrate
vOTU-81635	DP210__6152	Totiviridae	Totiviridae sp.	environment
vOTU-15929	DP057__19652	Retroviridae	-	vertebrate
vOTU-26488	DP095__11489	Metaviridae	-	environment
vOTU-48446	DP160__1902	Togaviridae	-	environment
vOTU-40386	DP129__17477	Retroviridae	Human endogenous retrovirus W	vertebrate
vOTU-53653	DP171__1063	Totiviridae	Totiviridae sp.	environment
vOTU-25014	DP089__620	Flaviviridae	Hepacivirus C	vertebrate
vOTU-4295	DP007__4051	Retroviridae	Human endogenous retrovirus K	vertebrate
vOTU-80893	DP209__5628	Coronaviridae	Human coronavirus HKU1	vertebrate
vOTU-5811	DP007__9888	Retroviridae	Human endogenous retrovirus W	vertebrate
vOTU-54173	DP176__1032	Retroviridae	Human endogenous retrovirus K	vertebrate
vOTU-55325	DP186__3589	Retroviridae	Feline immunodeficiency virus	vertebrate
vOTU-52342	DP165__978	Retroviridae	Feline immunodeficiency virus	vertebrate
vOTU-46240	DP158__16906	Metaviridae	-	environment
vOTU-79506	DP205__1490	Retroviridae	Rhinella marina endogenous retrovirus	vertebrate
vOTU-17400	DP059__1292	Totiviridae	Totiviridae sp.	environment
vOTU-140	DP003__762	Retroviridae	Human endogenous retrovirus W	vertebrate
vOTU-32457	DP123__521	Totiviridae	Totiviridae sp.	environment
vOTU-46920	DP158__22793	Metaviridae	-	invertebrate
vOTU-9184	DP010__2718	Potyviridae	Squash vein yellowing virus	vertebrate
vOTU-46593	DP158__20018	Metaviridae	-	environment
vOTU-62989	DP189__27580	Retroviridae	Human endogenous retrovirus W	vertebrate
vOTU-55547	DP188__1802	Retroviridae	Primate T-lymphotropic virus 1	vertebrate
vOTU-47329	DP158__26181	Metaviridae	-	invertebrate
vOTU-41962	DP149__134	Retroviridae	Human endogenous retrovirus K	vertebrate
vOTU-38753	DP129__10541	Retroviridae	Puma lentivirus	vertebrate
vOTU-47987	DP158__32210	Cystoviridae	Pectobacterium phage MA14	bacterium
vOTU-63805	DP189__30766	Retroviridae	Human endogenous retrovirus K	vertebrate
vOTU-49329	DP161__2423	Metaviridae	-	environment
vOTU-31347	DP119__35	Totiviridae	Totiviridae sp.	environment
vOTU-44485	DP158__1345	Metaviridae	-	environment
vOTU-45998	DP158__14811	Metaviridae	-	invertebrate
vOTU-3335	DP007__362	Retroviridae	Human endogenous retrovirus K	vertebrate
vOTU-33338	DP125__2629	Retroviridae	Walleye epidermal hyperplasia virus 1	vertebrate
vOTU-62342	DP189__25172	Retroviridae	Human endogenous retrovirus K	vertebrate
vOTU-25004	DP089__236	Totiviridae	Totiviridae sp.	environment
vOTU-54713	DP182__1221	Metaviridae	-	plant
vOTU-1576	DP005__543	Metaviridae	-	plant
vOTU-47992	DP158__32241	Metaviridae	-	plant
vOTU-47283	DP158__25767	Metaviridae	-	environment
vOTU-14986	DP057__16057	Retroviridae	Galidia ERV	vertebrate
vOTU-352	DP003__2280	Totiviridae	Totiviridae sp.	environment
vOTU-48035	DP158__32656	Metaviridae	-	environment
vOTU-39671	DP129__14371	Retroviridae	Human endogenous retrovirus W	vertebrate
vOTU-1671	DP005__1115	Retroviridae	Human endogenous retrovirus K	vertebrate
vOTU-44853	DP158__4658	Metaviridae	-	environment
vOTU-22071	DP088__12698	Retroviridae	Porcine type-C oncovirus	vertebrate
vOTU-7960	DP008__1106	Cystoviridae	Cystoviridae sp.	invertebrate
vOTU-83814	DP221__544	Leviviridae	Leviviridae sp.	bacterium
vOTU-45609	DP158__11641	Metaviridae	-	environment
vOTU-68536	DP189__48424	Retroviridae	Human endogenous retrovirus W	vertebrate
vOTU-57183	DP189__5810	Retroviridae	-	vertebrate
vOTU-39351	DP129__12949	Retroviridae	-	vertebrate
vOTU-53556	DP169__60	Totiviridae	Totiviridae sp.	environment
vOTU-28040	DP098__5264	Retroviridae	-	vertebrate
vOTU-78688	DP202__32	Metaviridae	-	environment
vOTU-82909	DP217__2151	Totiviridae	Totiviridae sp.	environment
vOTU-10514	DP052__2631	Totiviridae	Totiviridae sp.	environment
vOTU-21684	DP088__10982	Retroviridae	Human endogenous retrovirus W	vertebrate
vOTU-80606	DP209__1155	Metaviridae	-	plant
vOTU-77438	DP198__3136	Betaflexiviridae	Cherry twisted leaf associated virus	plant
vOTU-32808	DP125__609	Retroviridae	-	vertebrate
vOTU-1961	DP006__1137	Retroviridae	-	vertebrate
vOTU-81182	DP209__9890	Retroviridae	Squirrel monkey retrovirus	vertebrate
vOTU-17350	DP059__305	Metaviridae	-	environment
vOTU-82719	DP214__6	Totiviridae	Totiviridae sp.	environment
vOTU-72693	DP193__11448	Retroviridae	Human endogenous retrovirus W	vertebrate
vOTU-69674	DP191__4122	Retroviridae	Human endogenous retrovirus W	vertebrate
vOTU-81047	DP209__7724	Retroviridae	Primate T-lymphotropic virus 1	vertebrate
vOTU-47369	DP158__26477	Retroviridae	Squirrel monkey retrovirus	vertebrate
vOTU-58685	DP189__11369	Retroviridae	Human endogenous retrovirus W	vertebrate
vOTU-78714	DP202__458	Metaviridae	-	environment
vOTU-69135	DP190__1399	Retroviridae	-	environment
vOTU-80737	DP209__3093	Cystoviridae	Cystoviridae sp.	invertebrate
vOTU-46191	DP158__16528	Metaviridae	-	environment
vOTU-78584	DP201__1790	Totiviridae	Totiviridae sp.	environment
vOTU-47268	DP158__25642	Metaviridae	-	invertebrate
vOTU-60122	DP189__16801	Retroviridae	Human endogenous retrovirus	vertebrate
vOTU-11493	DP057__2941	Retroviridae	Porcine type-C oncovirus	vertebrate
vOTU-36095	DP128__4403	Totiviridae	Totiviridae sp.	environment
vOTU-46798	DP158__21782	Metaviridae	-	plant
vOTU-47765	DP158__30034	Metaviridae	-	environment
vOTU-8644	DP009__7672	Totiviridae	Totiviridae sp.	environment
vOTU-12476	DP057__6547	Retroviridae	Rhinella marina endogenous retrovirus	vertebrate
vOTU-44750	DP158__3641	Togaviridae	Southern elephant seal virus	vertebrate
vOTU-43872	DP153__1579	Leviviridae	Leviviridae sp.	bacterium
vOTU-40210	DP129__16686	Retroviridae	Feline immunodeficiency virus	vertebrate
vOTU-47450	DP158__27192	Pseudoviridae	Penicillium camemberti virus - GP1	fungus
vOTU-53598	DP170__352	Togaviridae	Eastern equine encephalitis virus	vertebrate
vOTU-77941	DP200__21	Totiviridae	Totiviridae sp.	environment
vOTU-83195	DP218__1853	Retroviridae	Equine foamy virus	vertebrate
vOTU-76647	DP197__1710	Cystoviridae	Cystoviridae sp.	invertebrate
vOTU-11466	DP057__2838	Retroviridae	Reticuloendotheliosis virus	vertebrate
vOTU-49212	DP161__129	Retroviridae	Feline immunodeficiency virus	vertebrate
vOTU-45235	DP158__8213	Leviviridae	Leviviridae sp.	bacterium
vOTU-52605	DP165__8696	Cystoviridae	Cystoviridae sp.	invertebrate
vOTU-82715	DP213__3133	Totiviridae	Totiviridae sp.	environment
vOTU-80997	DP209__7119	Leviviridae	Leviviridae sp.	bacterium
vOTU-46672	DP158__20650	Metaviridae	-	environment
vOTU-10036	DP040__492	Cystoviridae	Cystoviridae sp.	invertebrate
vOTU-44647	DP158__2769	Metaviridae	-	environment
vOTU-17591	DP078__2066	Betaflexiviridae	Actinidia virus C	plant
vOTU-83162	DP218__1611	Metaviridae	-	plant
vOTU-32161	DP120__4123	Retroviridae	Human endogenous retrovirus W	vertebrate
vOTU-17394	DP059__1109	Metaviridae	-	plant
vOTU-11706	DP057__3728	Retroviridae	-	vertebrate
vOTU-78738	DP202__772	Cystoviridae	Cystoviridae sp.	invertebrate
vOTU-84347	DP224__497	Retroviridae	Human endogenous retrovirus	vertebrate
vOTU-25107	DP091__863	Betaflexiviridae	Cherry twisted leaf associated virus	plant
vOTU-48269	DP158__34442	Metaviridae	-	invertebrate
vOTU-35314	DP125__10574	Retroviridae	Human endogenous retrovirus W	vertebrate
vOTU-26144	DP095__7242	Pseudoviridae	Penicillium camemberti virus - GP1	fungus
vOTU-46308	DP158__17559	Pseudoviridae	Penicillium camemberti virus - GP1	fungus
vOTU-81380	DP210__2752	Metaviridae	-	plant
vOTU-82834	DP216__810	Retroviridae	Primate T-lymphotropic virus 1	vertebrate
vOTU-25000	DP089__50	Cystoviridae	Cystoviridae sp.	invertebrate
vOTU-76297	DP195__993	Cystoviridae	Cystoviridae sp.	invertebrate
vOTU-42292	DP149__2028	Retroviridae	Human endogenous retrovirus K	vertebrate
vOTU-7587	DP007__16811	Retroviridae	Reticuloendotheliosis virus	vertebrate
vOTU-6022	DP007__10712	Retroviridae	Porcine type-C oncovirus	vertebrate
vOTU-78602	DP201__2046	Retroviridae	Simian foamy virus	vertebrate
vOTU-43809	DP152__1137	Leviviridae	Leviviridae sp.	bacterium
vOTU-27017	DP095__18211	Totiviridae	Totiviridae sp.	environment
vOTU-80913	DP209__5882	Pseudoviridae	Penicillium camemberti virus - GP1	fungus
vOTU-53261	DP166__5801	Retroviridae	Caprine arthritis encephalitis virus	vertebrate
vOTU-53681	DP171__1711	Totiviridae	Totiviridae sp.	environment
vOTU-66723	DP189__41596	Retroviridae	Human endogenous retrovirus K	vertebrate
vOTU-46517	DP158__19366	Pseudoviridae	Penicillium camemberti virus - GP1	fungus
vOTU-54919	DP185__248	Retroviridae	Feline immunodeficiency virus	vertebrate
vOTU-10120	DP046__441	Totiviridae	Totiviridae sp.	environment
vOTU-31488	DP120__552	Retroviridae	Murine leukemia virus	vertebrate
vOTU-26393	DP095__10313	Retroviridae	Feline leukemia virus	vertebrate
vOTU-16962	DP058__5522	Betaflexiviridae	Grapevine virus A	plant
vOTU-25497	DP091__5606	Totiviridae	Totiviridae sp.	environment
vOTU-53771	DP171__4218	Leviviridae	Leviviridae sp.	bacterium
vOTU-82903	DP217__1765	Leviviridae	Leviviridae sp.	bacterium
vOTU-79639	DP205__2103	Dicistroviridae	Plasmopara viticola lesion associated dicistro-like virus 1	fungus
vOTU-9941	DP031__1532	Betaflexiviridae	Grapevine virus F	plant
vOTU-61747	DP189__22929	Retroviridae	Equine foamy virus	vertebrate
vOTU-137	DP003__744	Retroviridae	Human endogenous retrovirus K	vertebrate
vOTU-41599	DP143__1737	Totiviridae	Totiviridae sp.	environment
vOTU-8482	DP009__4370	Flaviviridae	Hepacivirus C	vertebrate
vOTU-46311	DP158__17579	Pseudoviridae	Penicillium camemberti virus - GP1	fungus
vOTU-27011	DP095__18123	Metaviridae	-	invertebrate
vOTU-54807	DP183__479	Coronaviridae	Bottlenose dolphin coronavirus	vertebrate
vOTU-52593	DP165__8228	Retroviridae	Feline immunodeficiency virus	vertebrate
vOTU-84813	DP225__489	Retroviridae	Feline immunodeficiency virus	vertebrate
vOTU-63701	DP189__30313	Retroviridae	Human endogenous retrovirus K	vertebrate
vOTU-33382	DP125__2792	Retroviridae	Human endogenous retrovirus	vertebrate
vOTU-53809	DP172__164	Retroviridae	Primate T-lymphotropic virus 1	vertebrate
vOTU-28412	DP098__7208	Partitiviridae	Partitiviridae sp.	environment
vOTU-31361	DP119__307	Potyviridae	Iris mild mosaic virus	plant
vOTU-12990	DP057__8559	Retroviridae	Snakehead retrovirus	vertebrate
vOTU-9021	DP010__1833	Coronaviridae	Gull coronavirus	vertebrate
vOTU-9978	DP031__2177	Cystoviridae	Cystoviridae sp.	invertebrate
vOTU-9974	DP031__2078	Cystoviridae	Cystoviridae sp.	invertebrate
vOTU-44416	DP158__773	Metaviridae	-	environment
vOTU-19757	DP088__2508	Retroviridae	Galidia ERV	vertebrate
vOTU-49086	DP160__11570	Totiviridae	Totiviridae sp.	environment
vOTU-77223	DP198__787	Cystoviridae	Cystoviridae sp.	invertebrate
vOTU-47481	DP158__27541	Metaviridae	-	environment
vOTU-56866	DP189__4726	Retroviridae	Human endogenous retrovirus	vertebrate
vOTU-25006	DP089__331	Totiviridae	Totiviridae sp.	environment
vOTU-78838	DP202__1982	Metaviridae	-	plant
vOTU-76189	DP194__204	Totiviridae	Totiviridae sp.	environment
vOTU-70237	DP192__4015	Metaviridae	-	environment
vOTU-44316	DP157__2481	Cystoviridae	Cystoviridae sp.	invertebrate
vOTU-44340	DP158__165	Metaviridae	-	invertebrate
vOTU-19100	DP082__5909	Cystoviridae	Cystoviridae sp.	invertebrate
vOTU-46451	DP158__18743	Pseudoviridae	Penicillium camemberti virus - GP1	fungus
vOTU-61724	DP189__22839	Retroviridae	Reticuloendotheliosis virus	vertebrate
vOTU-53601	DP170__421	Potyviridae	Iris mild mosaic virus	plant
vOTU-45691	DP158__12278	Metaviridae	-	invertebrate
vOTU-43673	DP149__10555	Retroviridae	Simian foamy virus	vertebrate
vOTU-41836	DP148__1292	Retroviridae	Human endogenous retrovirus W	vertebrate
vOTU-46829	DP158__22070	Pseudoviridae	Penicillium camemberti virus - GP1	fungus
vOTU-44930	DP158__5379	Metaviridae	-	environment
vOTU-47457	DP158__27287	Metaviridae	-	environment
vOTU-47480	DP158__27540	Metaviridae	-	environment
vOTU-50233	DP163__1769	Retroviridae	Rhinella marina endogenous retrovirus	vertebrate
vOTU-75481	DP193__24754	Retroviridae	Human endogenous retrovirus W	vertebrate
vOTU-40988	DP132__278	Cystoviridae	Cystoviridae sp.	invertebrate
vOTU-74368	DP193__19449	Retroviridae	Human endogenous retrovirus W	vertebrate
vOTU-46579	DP158__19935	Metaviridae	-	environment
vOTU-76470	DP197__538	Retroviridae	-	vertebrate
vOTU-69513	DP191__2665	Metaviridae	-	Invertebrate
vOTU-78761	DP202__1092	Totiviridae	Totiviridae sp.	environment
vOTU-82833	DP216__764	Leviviridae	Leviviridae sp.	bacterium
vOTU-25890	DP095__3866	Caliciviridae	Norwalk virus	vertebrate
vOTU-54733	DP182__1506	Totiviridae	Totiviridae sp.	environment
vOTU-39432	DP129__13312	Retroviridae	Human endogenous retrovirus	vertebrate
vOTU-56714	DP189__4152	Retroviridae	Human endogenous retrovirus W	vertebrate
vOTU-1029	DP003__7314	Retroviridae	Murine leukemia virus	vertebrate
vOTU-27671	DP098__3378	Pseudoviridae	Penicillium camemberti virus - GP1	fungus
vOTU-48201	DP158__34000	Metaviridae	-	plant
vOTU-31357	DP119__250	Cystoviridae	Cystoviridae sp.	invertebrate
vOTU-31294	DP118__995	Totiviridae	Totiviridae sp.	environment
vOTU-84797	DP224__3520	Totiviridae	Totiviridae sp.	environment
vOTU-41815	DP148__1135	Totiviridae	Totiviridae sp.	environment
vOTU-76585	DP197__1279	Totiviridae	Totiviridae sp.	environment
vOTU-25460	DP091__5092	Retroviridae	Primate T-lymphotropic virus 1	vertebrate
vOTU-56900	DP189__4847	Retroviridae	Human endogenous retrovirus K	vertebrate
vOTU-44	DP002__1173	Retroviridae	Galidia ERV	vertebrate
vOTU-38619	DP129__10038	Retroviridae	Human endogenous retrovirus K	vertebrate
vOTU-44532	DP158__1660	Metaviridae	-	environment
vOTU-45405	DP158__9820	Metaviridae	-	environment
vOTU-10183	DP047__489	Retroviridae	Feline immunodeficiency virus	vertebrate
vOTU-24348	DP088__22619	Retroviridae	Human endogenous retrovirus K	vertebrate
vOTU-80914	DP209__5896	Metaviridae	-	environment
vOTU-7191	DP007__15306	Retroviridae	Walleye dermal sarcoma virus	vertebrate
vOTU-15074	DP057__16344	Retroviridae	Equine foamy virus	vertebrate
vOTU-26177	DP095__7554	Betaflexiviridae	Cherry twisted leaf associated virus	plant
vOTU-47994	DP158__32244	Metaviridae	-	environment
vOTU-46324	DP158__17729	Metaviridae	-	environment
vOTU-69933	DP191__6206	Retroviridae	Jaagsiekte sheep retrovirus	vertebrate
vOTU-66556	DP189__41013	Retroviridae	Human endogenous retrovirus W	vertebrate
vOTU-55303	DP186__3400	Retroviridae	Jaagsiekte sheep retrovirus	vertebrate
vOTU-58440	DP189__10466	Retroviridae	-	vertebrate
vOTU-52597	DP165__8355	Retroviridae	Feline immunodeficiency virus	vertebrate
vOTU-82564	DP212__4180	Retroviridae	Human endogenous retrovirus W	vertebrate
vOTU-48260	DP158__34383	Metaviridae	-	environment
vOTU-72175	DP193__8794	Retroviridae	-	vertebrate
vOTU-549	DP003__3636	Retroviridae	Human endogenous retrovirus	vertebrate
vOTU-45478	DP158__10371	Metaviridae	-	environment
vOTU-71834	DP193__7236	Retroviridae	-	plant
vOTU-49226	DP161__434	Retroviridae	Primate T-lymphotropic virus 1	vertebrate
vOTU-30162	DP100__1874	Leviviridae	Leviviridae sp.	bacterium
vOTU-9636	DP010__4934	Togaviridae	-	environment
vOTU-84081	DP221__6142	Leviviridae	Leviviridae sp.	bacterium
vOTU-48212	DP158__34134	Metaviridae	-	environment
vOTU-70235	DP192__3980	Betaflexiviridae	Cherry twisted leaf associated virus	plant
vOTU-17417	DP060__1297	Retroviridae	Equine foamy virus	vertebrate
vOTU-82821	DP216__324	Leviviridae	Leviviridae sp.	bacterium
vOTU-70406	DP193__426	Betaflexiviridae	Actinidia virus A	plant
vOTU-58406	DP189__10361	Retroviridae	Human endogenous retrovirus	vertebrate
vOTU-42595	DP149__3856	Leviviridae	Leviviridae sp.	bacterium
vOTU-81016	DP209__7337	Totiviridae	Totiviridae sp.	environment
vOTU-45689	DP158__12260	Metaviridae	-	environment
vOTU-74217	DP193__18653	Retroviridae	Human endogenous retrovirus W	vertebrate
vOTU-28031	DP098__5225	Retroviridae	Human endogenous retrovirus K	vertebrate
vOTU-47851	DP158__30904	Metaviridae	-	invertebrate
vOTU-53310	DP166__6223	Closteroviridae	Grapevine leafroll-associated virus 1	plant
vOTU-52470	DP165__4906	Retroviridae	Feline immunodeficiency virus	vertebrate
vOTU-33201	DP125__2074	Retroviridae	Human endogenous retrovirus W	vertebrate
vOTU-83466	DP219__610	Retroviridae	Feline immunodeficiency virus	vertebrate
vOTU-25028	DP091__71	Retroviridae	Feline immunodeficiency virus	vertebrate
vOTU-53864	DP173__432	Cystoviridae	Cystoviridae sp.	invertebrate
vOTU-37330	DP129__4559	Retroviridae	Jaagsiekte sheep retrovirus	vertebrate
vOTU-26360	DP095__9861	Cystoviridae	Cystoviridae sp.	invertebrate
vOTU-58784	DP189__11702	Metaviridae	-	plant
vOTU-54516	DP179__1115	Totiviridae	Totiviridae sp.	environment
vOTU-14701	DP057__15046	Retroviridae	Human endogenous retrovirus W	vertebrate
vOTU-11809	DP057__4117	Retroviridae	Feline immunodeficiency virus	vertebrate
vOTU-1220	DP004__75	Retroviridae	-	vertebrate
vOTU-28487	DP098__7637	Retroviridae	Reticuloendotheliosis virus	vertebrate
vOTU-19183	DP086__1133	Retroviridae	Simian immunodeficiency virus	vertebrate
vOTU-53595	DP170__331	Retroviridae	Primate T-lymphotropic virus 1	vertebrate
vOTU-30344	DP117__1152	Retroviridae	Human endogenous retrovirus K	vertebrate
vOTU-47367	DP158__26474	Metaviridae	-	environment
vOTU-76617	DP197__1518	Totiviridae	Totiviridae sp.	environment
vOTU-6585	DP007__12924	Retroviridae	Bat gammaretrovirus	vertebrate
vOTU-52111	DP164__1802	Retroviridae	Rhinella marina endogenous retrovirus	vertebrate
vOTU-45015	DP158__6236	Metaviridae	-	plant
vOTU-54893	DP184__1786	Retroviridae	Human endogenous retrovirus K	vertebrate
vOTU-47394	DP158__26738	Retroviridae	Human endogenous retrovirus W	vertebrate
vOTU-28479	DP098__7588	Pseudoviridae	Penicillium camemberti virus - GP1	fungus
vOTU-49353	DP161__2836	Cystoviridae	Pectobacterium phage MA14	bacterium
vOTU-44509	DP158__1483	Metaviridae	-	environment
vOTU-82304	DP212__2483	Metaviridae	-	environment
vOTU-54551	DP180__955	Cystoviridae	Cystoviridae sp.	invertebrate
vOTU-45812	DP158__13217	Metaviridae	-	plant
vOTU-44671	DP158__2956	Metaviridae	-	environment
vOTU-46471	DP158__18959	Metaviridae	-	environment
vOTU-10587	DP053__737	Totiviridae	Totiviridae sp.	environment
vOTU-80379	DP206__841	Cystoviridae	Cystoviridae sp.	invertebrate
vOTU-80744	DP209__3173	Cystoviridae	Cystoviridae sp.	invertebrate
vOTU-81858	DP211__1873	Metaviridae	-	environment
vOTU-8559	DP009__5986	Flaviviridae	Hepacivirus C	vertebrate
vOTU-47755	DP158__29971	Metaviridae	-	environment
vOTU-17524	DP078__1024	Betaflexiviridae	Actinidia virus B	plant
vOTU-44747	DP158__3624	Pseudoviridae	Penicillium camemberti virus - GP1	fungus
vOTU-17667	DP078__3254	Cystoviridae	Cystoviridae sp.	invertebrate
vOTU-52320	DP165__374	Leviviridae	Leviviridae sp.	bacterium
vOTU-6486	DP007__12545	Retroviridae	Pipistrellus pipistrellus endogenous retrovirus	vertebrate
vOTU-53565	DP169__207	Togaviridae	Eastern equine encephalitis virus	vertebrate
vOTU-53651	DP171__1037	Totiviridae	Totiviridae sp.	environment
vOTU-48707	DP160__5588	Retroviridae	Feline immunodeficiency virus	vertebrate
vOTU-71191	DP193__4194	Retroviridae	Feline immunodeficiency virus	vertebrate
vOTU-32556	DP124__744	Totiviridae	Totiviridae sp.	environment
vOTU-58604	DP189__11063	Retroviridae	Reticuloendotheliosis virus	vertebrate
vOTU-46998	DP158__23509	Pseudoviridae	Penicillium camemberti virus - GP1	fungus
vOTU-54642	DP181__1547	Dicistroviridae	Plasmopara viticola lesion associated dicistro-like virus 1	fungus
vOTU-47877	DP158__31131	Retroviridae	Human endogenous retrovirus	vertebrate
vOTU-12633	DP057__7145	Retroviridae	Human endogenous retrovirus W	vertebrate
vOTU-76211	DP194__824	Retroviridae	-	environment
vOTU-8317	DP009__1054	Totiviridae	Totiviridae sp.	environment
vOTU-24378	DP088__22758	Totiviridae	Totiviridae sp.	environment
vOTU-21754	DP088__11307	Leviviridae	Leviviridae sp.	bacterium
vOTU-17625	DP078__2644	Metaviridae	-	environment
vOTU-12851	DP057__8030	Retroviridae	Woolly monkey sarcoma virus	vertebrate
vOTU-53717	DP171__2885	Leviviridae	Leviviridae sp.	bacterium
vOTU-69941	DP191__6262	Leviviridae	Leviviridae sp.	bacterium
vOTU-54835	DP184__309	Totiviridae	Totiviridae sp.	environment
vOTU-28302	DP098__6657	Retroviridae	Human immunodeficiency virus 1	vertebrate
vOTU-8016	DP008__1618	Cystoviridae	Cystoviridae sp.	invertebrate
vOTU-53572	DP169__336	Totiviridae	Totiviridae sp.	environment
vOTU-45909	DP158__14022	Metaviridae	-	environment
vOTU-1356	DP004__2538	Cystoviridae	Cystoviridae sp.	invertebrate
vOTU-17567	DP078__1796	Retroviridae	Feline immunodeficiency virus	vertebrate
vOTU-45759	DP158__12779	Metaviridae	-	environment
vOTU-26267	DP095__8642	Retroviridae	Feline immunodeficiency virus	vertebrate
vOTU-69566	DP191__3147	Retroviridae	-	vertebrate
vOTU-46389	DP158__18204	Metaviridae	-	invertebrate
vOTU-46655	DP158__20512	Metaviridae	-	invertebrate
vOTU-23212	DP088__17562	Retroviridae	Atlantic salmon swim bladder sarcoma virus	vertebrate
vOTU-80652	DP209__1841	Retroviridae	-	environment
vOTU-25019	DP089__804	Togaviridae	Eastern equine encephalitis virus	vertebrate
vOTU-60413	DP189__17872	Retroviridae	Human endogenous retrovirus K	vertebrate
vOTU-25131	DP091__1144	Leviviridae	Leviviridae sp.	bacterium
vOTU-16850	DP058__4770	Retroviridae	Human endogenous retrovirus K	vertebrate
vOTU-61030	DP189__20145	Retroviridae	Human endogenous retrovirus K	vertebrate
vOTU-1000	DP003__7061	Retroviridae	Human endogenous retrovirus K	vertebrate
vOTU-73457	DP193__15044	Retroviridae	Human endogenous retrovirus K	vertebrate
vOTU-8123	DP008__2913	Retroviridae	Bovine leukemia virus	vertebrate
vOTU-47303	DP158__25968	Metaviridae	-	environment
vOTU-77929	DP199__1063	Retroviridae	Feline immunodeficiency virus	vertebrate
vOTU-4124	DP007__3345	Retroviridae	-	vertebrate
vOTU-80882	DP209__5447	Betaflexiviridae	Cherry twisted leaf associated virus	plant
vOTU-19709	DP088__2307	Totiviridae	Totiviridae sp.	environment
vOTU-84227	DP223__826	Retroviridae	Feline immunodeficiency virus	vertebrate
vOTU-1734	DP005__1499	Coronaviridae	Bottlenose dolphin coronavirus	vertebrate
vOTU-48228	DP158__34217	Metaviridae	-	invertebrate
vOTU-16685	DP058__3719	Togaviridae	-	environment
vOTU-48503	DP160__2743	Retroviridae	-	vertebrate
vOTU-4907	DP007__6422	Retroviridae	Endogenous prairie dog retrovirus	vertebrate
vOTU-7437	DP007__16255	Retroviridae	Syconycteris australis gammaretrovirus	vertebrate
vOTU-37672	DP129__5873	Retroviridae	Human endogenous retrovirus K	vertebrate
vOTU-74718	DP193__21101	Retroviridae	-	environment
vOTU-10652	DP055__2361	Totiviridae	Totiviridae sp.	environment
vOTU-42044	DP149__562	Retroviridae	Human endogenous retrovirus K	vertebrate
vOTU-36333	DP129__576	Retroviridae	Human endogenous retrovirus W	vertebrate
vOTU-31305	DP118__1752	Cystoviridae	Cystoviridae sp.	invertebrate
vOTU-9961	DP031__1920	Leviviridae	Leviviridae sp.	bacterium
vOTU-41629	DP145__308	Metaviridae	-	environment
vOTU-8539	DP009__5544	Totiviridae	Totiviridae sp.	environment
vOTU-79172	DP204__998	Cystoviridae	Cystoviridae sp.	invertebrate
vOTU-52413	DP165__3292	Totiviridae	Totiviridae sp.	environment
vOTU-46532	DP158__19582	Metaviridae	-	invertebrate
vOTU-53908	DP173__1171	Metaviridae	-	environment
vOTU-28112	DP098__5679	Coronaviridae	Human coronavirus HKU1	vertebrate
vOTU-76377	DP196__1866	Totiviridae	Totiviridae sp.	environment
vOTU-77605	DP198__5152	Cystoviridae	Cystoviridae sp.	invertebrate
vOTU-55527	DP188__977	Cystoviridae	Cystoviridae sp.	invertebrate
vOTU-11308	DP057__2276	Retroviridae	Porcine type-C oncovirus	vertebrate
vOTU-52005	DP164__1205	Cystoviridae	Cystoviridae sp.	invertebrate
vOTU-56379	DP189__2954	Retroviridae	Human endogenous retrovirus K	vertebrate
vOTU-45737	DP158__12636	Metaviridae	-	environment
vOTU-29429	DP099__4398	Retroviridae	Human endogenous retrovirus K	vertebrate
vOTU-48262	DP158__34395	Metaviridae	-	environment
vOTU-66276	DP189__39980	Retroviridae	Murine leukemia virus	vertebrate
vOTU-82488	DP212__3629	Retroviridae	Porcine type-C oncovirus	vertebrate
vOTU-70152	DP192__2322	Togaviridae	-	environment
vOTU-52268	DP164__2764	Retroviridae	Reticuloendotheliosis virus	vertebrate
vOTU-26990	DP095__17891	Leviviridae	Leviviridae sp.	bacterium
vOTU-10341	DP049__1145	Metaviridae	-	environment
vOTU-54790	DP183__118	Totiviridae	Totiviridae sp.	environment
vOTU-45464	DP158__10274	Metaviridae	-	plant
vOTU-78051	DP200__959	Retroviridae	Rhinella marina endogenous retrovirus	vertebrate
vOTU-4157	DP007__3477	Retroviridae	Bat gammaretrovirus	vertebrate
vOTU-19093	DP082__5587	Totiviridae	Totiviridae sp.	environment
vOTU-80372	DP206__625	Totiviridae	Totiviridae sp.	environment
vOTU-35685	DP128__1090	Retroviridae	Walleye epidermal hyperplasia virus 1	vertebrate
vOTU-69075	DP190__189	Leviviridae	Leviviridae sp.	bacterium
vOTU-11565	DP057__3205	Retroviridae	Human endogenous retrovirus W	vertebrate
vOTU-32184	DP120__4273	Retroviridae	Porcine type-C oncovirus	vertebrate
vOTU-32529	DP124__365	Metaviridae	-	environment
vOTU-46411	DP158__18416	Metaviridae	-	environment
vOTU-5272	DP007__7872	Leviviridae	Leviviridae sp.	bacterium
vOTU-79111	DP203__2202	Cystoviridae	Cystoviridae sp.	invertebrate
vOTU-81740	DP210__7692	Coronaviridae	Human coronavirus HKU1	vertebrate
vOTU-79180	DP204__1141	Retroviridae	Rhinella marina endogenous retrovirus	vertebrate
vOTU-16321	DP058__1569	Dicistroviridae	Plasmopara viticola lesion associated dicistro-like virus 1	fungus
vOTU-83694	DP220__2967	Retroviridae	Fujinami sarcoma virus	vertebrate
vOTU-68768	DP189__49319	Retroviridae	Feline immunodeficiency virus	vertebrate
vOTU-10631	DP055__1675	Retroviridae	Atlantic salmon swim bladder sarcoma virus	vertebrate
vOTU-76424	DP197__246	Retroviridae	-	vertebrate
vOTU-1434	DP004__3900	Metaviridae	-	environment
vOTU-61352	DP189__21349	Retroviridae	Human endogenous retrovirus K	vertebrate
vOTU-8530	DP009__5276	Retroviridae	Feline immunodeficiency virus	vertebrate
vOTU-47157	DP158__24677	Pseudoviridae	Penicillium camemberti virus - GP1	fungus
vOTU-25502	DP091__5643	Retroviridae	Feline immunodeficiency virus	vertebrate
vOTU-53688	DP171__1841	Metaviridae	-	plant
vOTU-45724	DP158__12523	Metaviridae	-	environment
vOTU-55301	DP186__3391	Retroviridae	Rhinella marina endogenous retrovirus	vertebrate
vOTU-46503	DP158__19244	Metaviridae	-	environment
vOTU-37259	DP129__4301	Retroviridae	Human endogenous retrovirus K	vertebrate
vOTU-51579	DP163__8054	Retroviridae	Jaagsiekte sheep retrovirus	vertebrate
vOTU-41553	DP142__866	Retroviridae	Equine foamy virus	vertebrate
vOTU-41660	DP146__861	Totiviridae	Totiviridae sp.	environment
vOTU-5190	DP007__7533	Retroviridae	Human endogenous retrovirus	vertebrate
vOTU-77907	DP199__446	Leviviridae	Leviviridae sp.	bacterium
vOTU-10103	DP042__1276	Totiviridae	Totiviridae sp.	environment
vOTU-44687	DP158__3048	Metaviridae	-	invertebrate
vOTU-67855	DP189__45925	Retroviridae	Human endogenous retrovirus K	vertebrate
vOTU-82734	DP214__508	Metaviridae	-	environment
vOTU-64173	DP189__32162	Retroviridae	Human endogenous retrovirus W	vertebrate
vOTU-70155	DP192__2413	Leviviridae	Leviviridae sp.	bacterium
vOTU-47239	DP158__25340	Retroviridae	-	environment
vOTU-59594	DP189__14826	Retroviridae	Equine foamy virus	vertebrate
vOTU-79035	DP203__1465	Retroviridae	Ovine enzootic nasal tumor virus	vertebrate
vOTU-17952	DP081__1253	Betaflexiviridae	Cherry twisted leaf associated virus	plant
vOTU-45282	DP158__8757	Metaviridae	-	environment
vOTU-41560	DP142__1192	Leviviridae	Leviviridae sp.	bacterium
vOTU-75133	DP193__23052	Retroviridae	Human endogenous retrovirus K	vertebrate
vOTU-19204	DP086__1789	Metaviridae	-	environment
vOTU-81876	DP211__2207	Cystoviridae	Cystoviridae sp.	invertebrate
vOTU-17408	DP059__1496	Cystoviridae	Cystoviridae sp.	invertebrate
vOTU-45725	DP158__12524	Metaviridae	-	invertebrate
vOTU-45020	DP158__6273	Metaviridae	-	environment
vOTU-82353	DP212__2771	Totiviridae	Totiviridae sp.	environment
vOTU-71110	DP193__3851	Retroviridae	-	vertebrate
vOTU-80371	DP206__579	Retroviridae	Primate T-lymphotropic virus 1	vertebrate
vOTU-48753	DP160__6154	Retroviridae	RD114 retrovirus	vertebrate
vOTU-47896	DP158__31326	Metaviridae	-	environment
vOTU-77731	DP198__6333	Cystoviridae	Cystoviridae sp.	invertebrate
vOTU-63348	DP189__28903	Retroviridae	Human endogenous retrovirus K	vertebrate
vOTU-80999	DP209__7127	Totiviridae	Totiviridae sp.	environment
vOTU-78475	DP201__630	Metaviridae	-	environment
vOTU-70202	DP192__3266	Retroviridae	Feline immunodeficiency virus	vertebrate
vOTU-43719	DP150__435	Leviviridae	Leviviridae sp.	bacterium
vOTU-83118	DP218__1380	Cystoviridae	Cystoviridae sp.	invertebrate
vOTU-53576	DP169__370	Flaviviridae	Hepacivirus C	vertebrate
vOTU-84107	DP222__118	Dicistroviridae	Plasmopara viticola lesion associated dicistro-like virus 1	fungus
vOTU-80242	DP205__5081	Retroviridae	Human endogenous retrovirus W	vertebrate
vOTU-46147	DP158__16105	Pseudoviridae	Penicillium camemberti virus - GP1	fungus
vOTU-49319	DP161__2087	Metaviridae	-	environment
vOTU-52035	DP164__1393	Pseudoviridae	Penicillium camemberti virus - GP1	fungus
vOTU-10563	DP053__91	Metaviridae	-	plant
vOTU-39243	DP129__12524	Totiviridae	Totiviridae sp.	environment
vOTU-38626	DP129__10056	Retroviridae	Bat gammaretrovirus	vertebrate
vOTU-1404	DP004__3371	Cystoviridae	Cystoviridae sp.	invertebrate
vOTU-30099	DP100__346	Metaviridae	-	plant
vOTU-48353	DP160__86	Retroviridae	Feline immunodeficiency virus	vertebrate
vOTU-48701	DP160__5511	Leviviridae	Leviviridae sp.	bacterium
vOTU-81907	DP211__2703	Metaviridae	-	environment
vOTU-11763	DP057__3975	Retroviridae	Rhinella marina endogenous retrovirus	vertebrate
vOTU-80276	DP205__5261	Retroviridae	Echidna ERV	vertebrate
vOTU-45289	DP158__8823	Metaviridae	-	environment
vOTU-45102	DP158__6922	Metaviridae	-	invertebrate
vOTU-55124	DP186__1598	Retroviridae	Endogenous prairie dog retrovirus	vertebrate
vOTU-67609	DP189__44927	Retroviridae	Human endogenous retrovirus	vertebrate
vOTU-47432	DP158__27007	Metaviridae	-	invertebrate
vOTU-17431	DP060__1905	Totiviridae	Totiviridae sp.	environment
vOTU-46586	DP158__19982	Pseudoviridae	Penicillium camemberti virus - GP1	fungus
vOTU-44342	DP158__172	Metaviridae	-	environment
vOTU-82713	DP213__3120	Leviviridae	Leviviridae sp.	bacterium
vOTU-54981	DP186__90	Retroviridae	Feline immunodeficiency virus	vertebrate
vOTU-75997	DP193__27306	Totiviridae	Totiviridae sp.	environment
vOTU-33292	DP125__2450	Retroviridae	Reticuloendotheliosis virus	vertebrate
vOTU-32643	DP124__1953	Metaviridae	-	invertebrate
vOTU-7136	DP007__15091	Picornaviridae	Enterovirus B	vertebrate
vOTU-68893	DP189__49754	Retroviridae	Murine leukemia virus	vertebrate
vOTU-43135	DP149__7223	Retroviridae	Human endogenous retrovirus K	vertebrate
vOTU-82688	DP213__2334	Leviviridae	Leviviridae sp.	bacterium
vOTU-83987	DP221__4280	Metaviridae	-	environment
vOTU-44748	DP158__3629	Pseudoviridae	Penicillium camemberti virus - GP1	fungus
vOTU-80927	DP209__6127	Metaviridae	-	environment
vOTU-17812	DP081__133	Retroviridae	Human endogenous retrovirus W	vertebrate
vOTU-58678	DP189__11352	Retroviridae	Human endogenous retrovirus K	vertebrate
vOTU-38637	DP129__10106	Retroviridae	Bat gammaretrovirus	vertebrate
vOTU-18187	DP081__3006	Retroviridae	-	vertebrate
vOTU-82761	DP215__174	Cystoviridae	Cystoviridae sp.	invertebrate
vOTU-22044	DP088__12568	Retroviridae	Human endogenous retrovirus W	vertebrate
vOTU-54784	DP183__12	Flaviviridae	Hepacivirus C	vertebrate
vOTU-83882	DP221__1899	Totiviridae	Totiviridae sp.	environment
vOTU-10238	DP047__1086	Retroviridae	Primate T-lymphotropic virus 2	vertebrate
vOTU-16002	DP057__19904	Retroviridae	Human endogenous retrovirus K	vertebrate
vOTU-10503	DP052__2407	Retroviridae	Retroviridae sp.	vertebrate
vOTU-75347	DP193__24161	Retroviridae	Murine leukemia virus	vertebrate
vOTU-46408	DP158__18401	Metaviridae	-	invertebrate
vOTU-12065	DP057__5136	Leviviridae	Leviviridae sp.	bacterium
vOTU-81797	DP211__696	Metaviridae	-	environment
vOTU-48082	DP158__32986	Metaviridae	-	plant
vOTU-76282	DP195__610	Cystoviridae	Cystoviridae sp.	invertebrate
vOTU-18463	DP081__5148	Leviviridae	Leviviridae sp.	bacterium
vOTU-1015	DP003__7212	Leviviridae	Leviviridae sp.	bacterium
vOTU-53495	DP167__175	Totiviridae	Totiviridae sp.	environment
vOTU-49362	DP161__2977	Totiviridae	Totiviridae sp.	environment
vOTU-19781	DP088__2629	Retroviridae	Human endogenous retrovirus K	vertebrate
vOTU-76300	DP195__1147	Totiviridae	Totiviridae sp.	environment
vOTU-45750	DP158__12726	Pseudoviridae	Penicillium camemberti virus - GP1	fungus
vOTU-45882	DP158__13793	Metaviridae	-	environment
vOTU-44278	DP157__1555	Retroviridae	Human endogenous retrovirus	vertebrate
vOTU-52411	DP165__3255	Metaviridae	-	plant
vOTU-79110	DP203__2191	Leviviridae	Leviviridae sp.	bacterium
vOTU-53569	DP169__261	Coronaviridae	Bottlenose dolphin coronavirus	vertebrate
vOTU-67290	DP189__43726	Retroviridae	Human endogenous retrovirus	vertebrate
vOTU-47956	DP158__31950	Metaviridae	-	environment
vOTU-30106	DP100__443	Retroviridae	Feline immunodeficiency virus	vertebrate
vOTU-84277	DP224__31	Totiviridae	Totiviridae sp.	environment
vOTU-46873	DP158__22408	Pseudoviridae	Penicillium camemberti virus - GP1	fungus
vOTU-49502	DP161__5787	Totiviridae	Totiviridae sp.	environment
vOTU-2316	DP006__3466	Retroviridae	Human endogenous retrovirus	vertebrate
vOTU-29099	DP099__2785	Retroviridae	Walleye dermal sarcoma virus	vertebrate
vOTU-7088	DP007__14926	Retroviridae	Feline leukemia virus	vertebrate
vOTU-9918	DP031__1131	Retroviridae	Feline immunodeficiency virus	vertebrate
vOTU-51363	DP163__7014	Picornaviridae	Enterovirus B	vertebrate
vOTU-30757	DP117__3977	Retroviridae	Human endogenous retrovirus	vertebrate
vOTU-36208	DP129__120	Retroviridae	Puma lentivirus	vertebrate
vOTU-70149	DP192__2277	Retroviridae	Feline immunodeficiency virus	vertebrate
vOTU-53618	DP171__281	Potyviridae	Barley mild mosaic virus	plant
vOTU-53505	DP167__758	Leviviridae	Leviviridae sp.	bacterium
vOTU-81909	DP211__2785	Leviviridae	Leviviridae sp.	bacterium
vOTU-45022	DP158__6282	Leviviridae	Leviviridae sp.	bacterium
vOTU-28114	DP098__5701	Retroviridae	Human endogenous retrovirus K	vertebrate
vOTU-55479	DP187__1290	Leviviridae	Leviviridae sp.	bacterium
vOTU-78987	DP203__1043	Retroviridae	Caprine arthritis encephalitis virus	vertebrate
vOTU-37249	DP129__4265	Retroviridae	Human endogenous retrovirus K	vertebrate
vOTU-46742	DP158__21242	Metaviridae	-	invertebrate
vOTU-28465	DP098__7538	Retroviridae	Human endogenous retrovirus	vertebrate
vOTU-5339	DP007__8127	Retroviridae	Human endogenous retrovirus H	vertebrate
vOTU-46150	DP158__16147	Metaviridae	-	environment
vOTU-49366	DP161__3070	Betaflexiviridae	Cherry twisted leaf associated virus	plant
vOTU-9821	DP026__317	Leviviridae	Leviviridae sp.	bacterium
vOTU-48105	DP158__33179	Retroviridae	Human endogenous retrovirus	vertebrate
vOTU-79619	DP205__2009	Leviviridae	Leviviridae sp.	bacterium
vOTU-4945	DP007__6552	Retroviridae	-	vertebrate
vOTU-32719	DP125__266	Retroviridae	Human endogenous retrovirus W	vertebrate
vOTU-79672	DP205__2305	Metaviridae	-	environment
vOTU-54174	DP176__1034	Cystoviridae	Cystoviridae sp.	invertebrate
vOTU-47240	DP158__25342	Metaviridae	-	environment
vOTU-45375	DP158__9518	Pseudoviridae	Penicillium camemberti virus - GP1	fungus
vOTU-46512	DP158__19324	Metaviridae	-	invertebrate
vOTU-49258	DP161__1082	Leviviridae	Leviviridae sp.	bacterium
vOTU-45959	DP158__14469	Metaviridae	-	environment
vOTU-45109	DP158__6958	Metaviridae	-	invertebrate
vOTU-52582	DP165__7905	Leviviridae	Leviviridae sp.	bacterium
vOTU-42084	DP149__757	Retroviridae	Feline immunodeficiency virus	vertebrate
vOTU-1450	DP004__4206	Retroviridae	Jaagsiekte sheep retrovirus	vertebrate
vOTU-83361	DP218__2926	Leviviridae	Leviviridae sp.	bacterium
vOTU-77775	DP198__6634	Retroviridae	Primate T-lymphotropic virus 1	vertebrate
vOTU-81839	DP211__1551	Dicistroviridae	Plasmopara viticola lesion associated dicistro-like virus 1	fungus
vOTU-36670	DP129__1994	Retroviridae	Bat gammaretrovirus	vertebrate
vOTU-52272	DP164__2774	Leviviridae	Leviviridae sp.	bacterium
vOTU-7785	DP007__17605	Retroviridae	Human endogenous retrovirus K	vertebrate
vOTU-76441	DP197__392	Totiviridae	Totiviridae sp.	environment
vOTU-65109	DP189__35623	Retroviridae	Human endogenous retrovirus	vertebrate
vOTU-44089	DP155__1333	Metaviridae	-	environment
vOTU-78823	DP202__1758	Pseudoviridae	Penicillium camemberti virus - GP1	fungus
vOTU-61510	DP189__21925	Retroviridae	Reticuloendotheliosis virus	vertebrate
vOTU-62170	DP189__24590	Retroviridae	Reticuloendotheliosis virus	vertebrate
vOTU-84789	DP224__3481	Retroviridae	Eastern chimpanzee simian foamy virus	vertebrate
vOTU-45742	DP158__12664	Metaviridae	-	environment
vOTU-81717	DP210__7437	Pseudoviridae	Penicillium camemberti virus - GP1	fungus
vOTU-30926	DP117__5182	Retroviridae	Bovine leukemia virus	vertebrate
vOTU-46550	DP158__19744	Metaviridae	-	invertebrate
vOTU-64163	DP189__32129	Retroviridae	Human endogenous retrovirus K	vertebrate
vOTU-84079	DP221__6105	Metaviridae	-	environment
vOTU-856	DP003__5843	Retroviridae	Echidna ERV	vertebrate
vOTU-10266	DP047__1427	Retroviridae	Primate T-lymphotropic virus 1	vertebrate
vOTU-49207	DP161__14	Retroviridae	-	environment
vOTU-81231	DP210__580	Metaviridae	-	plant
vOTU-26051	DP095__6033	Dicistroviridae	Plasmopara viticola lesion associated dicistro-like virus 1	fungus
vOTU-47482	DP158__27554	Metaviridae	-	environment
vOTU-77894	DP199__9	Cystoviridae	Cystoviridae sp.	invertebrate
vOTU-49204	DP160__13431	Retroviridae	Human endogenous retrovirus K	vertebrate
vOTU-84957	DP227__557	Cystoviridae	Cystoviridae sp.	invertebrate
vOTU-49928	DP163__318	Retroviridae	Human endogenous retrovirus W	vertebrate
vOTU-49393	DP161__3612	Cystoviridae	Pectobacterium phage MA14	bacterium
vOTU-31359	DP119__291	Totiviridae	Totiviridae sp.	environment
vOTU-8433	DP009__3420	Leviviridae	Leviviridae sp.	bacterium
vOTU-15549	DP057__18152	Retroviridae	Human endogenous retrovirus	vertebrate
vOTU-83936	DP221__3247	Totiviridae	Totiviridae sp.	environment
vOTU-47836	DP158__30754	Metaviridae	-	environment
vOTU-54503	DP179__545	Totiviridae	Totiviridae sp.	environment
vOTU-53976	DP174__237	Totiviridae	Totiviridae sp.	environment
vOTU-48166	DP158__33734	Metaviridae	-	environment
vOTU-23551	DP088__18910	Retroviridae	Human endogenous retrovirus W	vertebrate
vOTU-8493	DP009__4516	Totiviridae	Totiviridae sp.	environment
vOTU-47150	DP158__24626	Metaviridae	-	plant
vOTU-83006	DP218__566	Retroviridae	Feline immunodeficiency virus	vertebrate
vOTU-64212	DP189__32272	Coronaviridae	Human coronavirus HKU1	vertebrate
vOTU-17482	DP078__357	Leviviridae	Leviviridae sp.	bacterium
vOTU-50049	DP163__822	Retroviridae	Human endogenous retrovirus K	vertebrate
vOTU-47595	DP158__28552	Metaviridae	-	environment
vOTU-66942	DP189__42401	Retroviridae	Mason-Pfizer monkey virus	vertebrate
vOTU-69572	DP191__3215	Retroviridae	Reticuloendotheliosis virus	vertebrate
vOTU-53898	DP173__979	Retroviridae	Feline immunodeficiency virus	vertebrate
vOTU-46566	DP158__19867	Metaviridae	-	invertebrate
vOTU-44814	DP158__4211	Pseudoviridae	Penicillium camemberti virus - GP1	fungus
vOTU-82867	DP216__1650	Metaviridae	-	plant
vOTU-64741	DP189__34322	Retroviridae	Equine foamy virus	vertebrate
vOTU-31249	DP117__7598	Cystoviridae	Cystoviridae sp.	invertebrate
vOTU-58647	DP189__11250	Retroviridae	Human endogenous retrovirus K	vertebrate
vOTU-54944	DP185__1749	Metaviridae	-	plant
vOTU-25897	DP095__3910	Cystoviridae	Cystoviridae sp.	invertebrate
vOTU-32462	DP123__577	Totiviridae	Totiviridae sp.	environment
vOTU-61054	DP189__20241	Retroviridae	-	vertebrate
vOTU-39309	DP129__12794	Retroviridae	Feline immunodeficiency virus	vertebrate
vOTU-44901	DP158__5166	Metaviridae	-	environment
vOTU-10000	DP031__2492	Leviviridae	Leviviridae sp.	bacterium
vOTU-30541	DP117__2495	Secoviridae	Black raspberry necrosis virus	plant
vOTU-45176	DP158__7598	Metaviridae	-	environment
vOTU-45035	DP158__6368	Retroviridae	Feline immunodeficiency virus	vertebrate
vOTU-65956	DP189__38716	Retroviridae	-	vertebrate
vOTU-46905	DP158__22694	Retroviridae	Bovine foamy virus	vertebrate
vOTU-67966	DP189__46336	Retroviridae	Human endogenous retrovirus K	vertebrate
vOTU-53998	DP174__1099	Totiviridae	Totiviridae sp.	environment
vOTU-55086	DP186__1129	Metaviridae	-	plant
vOTU-54791	DP183__120	Partitiviridae	Partitiviridae sp.	plant
vOTU-16335	DP058__1644	Totiviridae	Totiviridae sp.	environment
vOTU-25552	DP091__6135	Retroviridae	Feline immunodeficiency virus	vertebrate
vOTU-69023	DP189__50314	Retroviridae	Human endogenous retrovirus	vertebrate
vOTU-77897	DP199__83	Leviviridae	Leviviridae sp.	bacterium
vOTU-77050	DP197__4259	Totiviridae	Totiviridae sp.	environment
vOTU-82219	DP212__1851	Retroviridae	Reticuloendotheliosis virus	vertebrate
vOTU-44870	DP158__4821	Metaviridae	-	environment
vOTU-75950	DP193__27078	Retroviridae	Human endogenous retrovirus W	vertebrate
vOTU-47967	DP158__32037	Metaviridae	-	environment
vOTU-28508	DP098__7746	Metaviridae	-	environment
vOTU-52579	DP165__7814	Retroviridae	Feline leukemia virus	vertebrate
vOTU-53179	DP166__5179	Retroviridae	RD114 retrovirus	vertebrate
vOTU-31474	DP120__499	Cystoviridae	Cystoviridae sp.	invertebrate
vOTU-73681	DP193__16026	Cystoviridae	Cystoviridae sp.	invertebrate
vOTU-18485	DP081__5325	Betaflexiviridae	Actinidia virus C	plant
vOTU-76298	DP195__1139	Retroviridae	-	environment
vOTU-46042	DP158__15178	Pseudoviridae	Penicillium camemberti virus - GP1	fungus
vOTU-68285	DP189__47547	Retroviridae	Human endogenous retrovirus W	vertebrate
vOTU-81794	DP211__609	Metaviridae	-	invertebrate
vOTU-1603	DP005__684	Totiviridae	Totiviridae sp.	environment
vOTU-44985	DP158__5936	Metaviridae	-	environment
vOTU-55178	DP186__2115	Leviviridae	Leviviridae sp.	bacterium
vOTU-9660	DP010__5022	Cystoviridae	Cystoviridae sp.	invertebrate
vOTU-82507	DP212__3730	Metaviridae	-	environment
vOTU-55893	DP189__1240	Retroviridae	Walleye epidermal hyperplasia virus 1	vertebrate
vOTU-71251	DP193__4417	Retroviridae	Human endogenous retrovirus K	vertebrate
vOTU-9271	DP010__3158	Togaviridae	-	environment
vOTU-25524	DP091__5815	Metaviridae	-	environment
vOTU-78821	DP202__1725	Leviviridae	Leviviridae sp.	bacterium
vOTU-40511	DP129__17963	Retroviridae	Human endogenous retrovirus	vertebrate
vOTU-44413	DP158__750	Pseudoviridae	Penicillium camemberti virus - GP1	fungus
vOTU-49067	DP160__11244	Closteroviridae	Grapevine leafroll-associated virus 1	plant
vOTU-45859	DP158__13613	Metaviridae	-	environment
vOTU-48094	DP158__33053	Metaviridae	-	plant
vOTU-52375	DP165__2005	Cystoviridae	Pectobacterium phage MA14	bacterium
vOTU-57821	DP189__8195	Retroviridae	Human endogenous retrovirus	vertebrate
vOTU-52054	DP164__1488	Retroviridae	Feline immunodeficiency virus	vertebrate
vOTU-38546	DP129__9724	Retroviridae	Feline immunodeficiency virus	vertebrate
vOTU-48829	DP160__7219	Metaviridae	-	environment
vOTU-47083	DP158__24104	Metaviridae	-	environment
vOTU-44910	DP158__5228	Retroviridae	Caprine arthritis encephalitis virus	vertebrate
vOTU-52423	DP165__3544	Cystoviridae	Cystoviridae sp.	invertebrate
vOTU-41605	DP144__140	Metaviridae	-	plant
vOTU-40193	DP129__16640	Retroviridae	Human endogenous retrovirus	vertebrate
vOTU-84844	DP226__421	Leviviridae	Leviviridae sp.	bacterium
vOTU-49257	DP161__1080	Retroviridae	Bovine leukemia virus	vertebrate
vOTU-54812	DP183__606	Totiviridae	Totiviridae sp.	environment
vOTU-82424	DP212__3189	Retroviridae	Mason-Pfizer monkey virus	vertebrate
vOTU-5789	DP007__9805	Retroviridae	Feline immunodeficiency virus	vertebrate
vOTU-8985	DP010__1663	Totiviridae	Totiviridae sp.	environment
vOTU-10509	DP052__2499	Retroviridae	Caprine arthritis encephalitis virus	vertebrate
vOTU-81676	DP210__6781	Retroviridae	Feline immunodeficiency virus	vertebrate
vOTU-886	DP003__6077	Retroviridae	Rhinella marina endogenous retrovirus	vertebrate
vOTU-9407	DP010__3861	Retroviridae	Rhinella marina endogenous retrovirus	vertebrate
vOTU-7866	DP008__226	Betaflexiviridae	Currant virus A	plant
vOTU-48241	DP158__34287	Metaviridae	-	plant
vOTU-3922	DP007__2532	Retroviridae	Human endogenous retrovirus W	vertebrate
vOTU-73271	DP193__14235	Retroviridae	Walleye epidermal hyperplasia virus 1	vertebrate
vOTU-31350	DP119__70	Totiviridae	Totiviridae sp.	environment
vOTU-9238	DP010__2975	Dicistroviridae	Plasmopara viticola lesion associated dicistro-like virus 1	fungus
vOTU-9269	DP010__3150	Retroviridae	Porcine type-C oncovirus	vertebrate
vOTU-39745	DP129__14714	Retroviridae	Duck infectious anemia virus	vertebrate
vOTU-81891	DP211__2405	Retroviridae	Walleye dermal sarcoma virus	vertebrate
vOTU-10568	DP053__172	Totiviridae	Totiviridae sp.	environment
vOTU-47679	DP158__29260	Retroviridae	Bovine foamy virus	vertebrate
vOTU-48675	DP160__5045	Totiviridae	Totiviridae sp.	environment
vOTU-38729	DP129__10460	Retroviridae	Human endogenous retrovirus	vertebrate
vOTU-1523	DP005__35	Metaviridae	-	environment
vOTU-10573	DP053__296	Metaviridae	-	environment
vOTU-25012	DP089__550	Metaviridae	-	environment
vOTU-53568	DP169__249	Totiviridae	Totiviridae sp.	environment
vOTU-60905	DP189__19682	Retroviridae	Human endogenous retrovirus K	vertebrate
vOTU-1565	DP005__371	Totiviridae	Totiviridae sp.	environment
vOTU-19036	DP082__2353	Totiviridae	Totiviridae sp.	environment
vOTU-31355	DP119__180	Metaviridae	-	environment
vOTU-53605	DP170__455	Totiviridae	Totiviridae sp.	environment
vOTU-71903	DP193__7560	Retroviridae	Porcine type-C oncovirus	vertebrate
vOTU-8962	DP010__1571	Totiviridae	Totiviridae sp.	environment
vOTU-4820	DP007__6107	Retroviridae	Galidia ERV	vertebrate
vOTU-25022	DP089__833	Totiviridae	Totiviridae sp.	environment
vOTU-33089	DP125__1617	Retroviridae	Murine leukemia virus	vertebrate
vOTU-390	DP003__2515	Retroviridae	Human endogenous retrovirus	vertebrate
vOTU-54792	DP183__167	Totiviridae	Totiviridae sp.	environment
vOTU-53566	DP169__226	Metaviridae	-	plant
vOTU-35609	DP128__312	Retroviridae	Reticuloendotheliosis virus	vertebrate
vOTU-46774	DP158__21525	Retroviridae	Macaque simian foamy virus	vertebrate
vOTU-42782	DP149__4952	Retroviridae	Feline immunodeficiency virus	vertebrate
* It represented the sequence number of viral OTUs in our deep-sea viral metagenomic dataset which had been submitted to National Omics Data Encyclopedia database (accession number OEP002537).

## Sheet: Sheet1
Taxonomy
Siphoviridae
Siphoviridae
Microviridae
Microviridae
norank
Circoviridae
Microviridae
Circoviridae
Siphoviridae
Circoviridae
Circoviridae
Siphoviridae
Circoviridae
Circoviridae
Microviridae
Circoviridae
Circoviridae
Microviridae
Circoviridae
Siphoviridae
Microviridae
Circoviridae
Microviridae
Circoviridae
Circoviridae
Siphoviridae
Circoviridae
Circoviridae
norank
Circoviridae
Circoviridae
Microviridae
Siphoviridae
Podoviridae
Poxviridae
Myoviridae
Podoviridae
Poxviridae
Poxviridae
Poxviridae
Poxviridae
Poxviridae
Poxviridae
Mimiviridae
Genomoviridae
Microviridae
Myoviridae
Microviridae
Myoviridae
Microviridae
Microviridae
Circoviridae
Siphoviridae
Microviridae
Circoviridae
Microviridae
Microviridae
Microviridae
Microviridae
Microviridae
Microviridae
Microviridae
Microviridae
Circoviridae
Microviridae
Microviridae
Circoviridae
Microviridae
Retroviridae
Circoviridae
Poxviridae
Myoviridae
Myoviridae
Myoviridae
Podoviridae
Podoviridae
Poxviridae
Circoviridae
Poxviridae
Poxviridae
Microviridae
Myoviridae
Circoviridae
Siphoviridae
norank
Microviridae
Circoviridae
Microviridae
Poxviridae
Microviridae
Microviridae
Circoviridae
Circoviridae
Circoviridae
Siphoviridae
Microviridae
Microviridae
norank
Circoviridae
Microviridae
Microviridae
Circoviridae
Circoviridae
Circoviridae
Microviridae
Circoviridae
Circoviridae
Siphoviridae
Myoviridae
Microviridae
Microviridae
Circoviridae
Microviridae
Circoviridae
Mimiviridae
norank
Phycodnaviridae
Circoviridae
Phycodnaviridae
Microviridae
Circoviridae
norank
Microviridae
Microviridae
Microviridae
Microviridae
Siphoviridae
Podoviridae
Podoviridae
Microviridae
Microviridae
Circoviridae
Microviridae
Myoviridae
Podoviridae
Podoviridae
Podoviridae
Myoviridae
Podoviridae
Poxviridae
Podoviridae
Siphoviridae
Poxviridae
Siphoviridae
Myoviridae
Poxviridae
Myoviridae
Poxviridae
Poxviridae
Siphoviridae
Poxviridae
Microviridae
Myoviridae
Myoviridae
Myoviridae
Myoviridae
Poxviridae
Poxviridae
Siphoviridae
Poxviridae
Siphoviridae
Siphoviridae
Siphoviridae
Siphoviridae
Siphoviridae
Poxviridae
Poxviridae
Siphoviridae
Poxviridae
Siphoviridae
Poxviridae
Poxviridae
Siphoviridae
Podoviridae
Poxviridae
Siphoviridae
Podoviridae
Siphoviridae
Podoviridae
Myoviridae
Poxviridae
Podoviridae
Myoviridae
Poxviridae
Myoviridae
Poxviridae
Podoviridae
Microviridae
Siphoviridae
Poxviridae
Poxviridae
Siphoviridae
Microviridae
Myoviridae
Siphoviridae
Phycodnaviridae
Siphoviridae
Siphoviridae
Siphoviridae
Circoviridae
Siphoviridae
Myoviridae
Poxviridae
Podoviridae
Siphoviridae
Phycodnaviridae
Poxviridae
Siphoviridae
Poxviridae
Nimaviridae
Myoviridae
Circoviridae
Poxviridae
Siphoviridae
Poxviridae
Poxviridae
Poxviridae
Siphoviridae
Myoviridae
Siphoviridae
Siphoviridae
Poxviridae
Poxviridae
Poxviridae
Siphoviridae
Poxviridae
norank
Poxviridae
Poxviridae
norank
Poxviridae
Poxviridae
Poxviridae
Myoviridae
Siphoviridae
Retroviridae
Siphoviridae
Poxviridae
Poxviridae
Poxviridae
Siphoviridae
Siphoviridae
Poxviridae
Siphoviridae
Poxviridae
Poxviridae
Poxviridae
Poxviridae
Poxviridae
Poxviridae
Poxviridae
Siphoviridae
Poxviridae
Siphoviridae
Poxviridae
Poxviridae
Siphoviridae
Siphoviridae
Siphoviridae
Poxviridae
Poxviridae
Poxviridae
Poxviridae
Siphoviridae
Poxviridae
Siphoviridae
Siphoviridae
Poxviridae
Siphoviridae
Myoviridae
Siphoviridae
Siphoviridae
Poxviridae
Poxviridae
Poxviridae
Siphoviridae
Siphoviridae
Inoviridae
Siphoviridae
Poxviridae
Poxviridae
Poxviridae
Nimaviridae
Siphoviridae
Poxviridae
Siphoviridae
Poxviridae
Poxviridae
Podoviridae
Poxviridae
Poxviridae
Poxviridae
Poxviridae
Poxviridae
Poxviridae
Myoviridae
Poxviridae
Siphoviridae
Poxviridae
Siphoviridae
Poxviridae
Poxviridae
Poxviridae
Poxviridae
Siphoviridae
Poxviridae
Poxviridae
Poxviridae
Poxviridae
Poxviridae
Inoviridae
Poxviridae
Siphoviridae
Poxviridae
Poxviridae
Poxviridae
Nimaviridae
Poxviridae
Siphoviridae
Poxviridae
Poxviridae
Siphoviridae
Poxviridae
Poxviridae
Siphoviridae
Poxviridae
Siphoviridae
Siphoviridae
Siphoviridae
Myoviridae
Inoviridae
Siphoviridae
Siphoviridae
Nimaviridae
Siphoviridae
Poxviridae
Siphoviridae
Podoviridae
Poxviridae
Poxviridae
Poxviridae
Siphoviridae
Siphoviridae
Siphoviridae
Poxviridae
Poxviridae
Siphoviridae
Poxviridae
Poxviridae
Podoviridae
Poxviridae
Poxviridae
Siphoviridae
Poxviridae
Siphoviridae
Poxviridae
Poxviridae
Poxviridae
Poxviridae
Poxviridae
Nimaviridae
Siphoviridae
Siphoviridae
Siphoviridae
Poxviridae
Poxviridae
Circoviridae
Poxviridae
Myoviridae
Siphoviridae
Poxviridae
Inoviridae
norank
Poxviridae
Poxviridae
Circoviridae
Siphoviridae
Siphoviridae
Siphoviridae
Poxviridae
Siphoviridae
Poxviridae
norank
Poxviridae
Poxviridae
Siphoviridae
Poxviridae
Inoviridae
Siphoviridae
Siphoviridae
Nimaviridae
Siphoviridae
Inoviridae
Circoviridae
Nimaviridae
Poxviridae
Poxviridae
Poxviridae
Podoviridae
Poxviridae
Siphoviridae
Poxviridae
Poxviridae
Poxviridae
Siphoviridae
Siphoviridae
Siphoviridae
Inoviridae
Poxviridae
Poxviridae
Nimaviridae
Nimaviridae
Nimaviridae
Myoviridae
Podoviridae
Poxviridae
Nimaviridae
Poxviridae
Myoviridae
Nimaviridae
Poxviridae
Siphoviridae
Myoviridae
Poxviridae
Poxviridae
Poxviridae
Poxviridae
Siphoviridae
Siphoviridae
Poxviridae
Nimaviridae
Poxviridae
Siphoviridae
Poxviridae
Myoviridae
Siphoviridae
Myoviridae
Poxviridae
Myoviridae
Poxviridae
Nimaviridae
Poxviridae
Siphoviridae
Poxviridae
Siphoviridae
Poxviridae
Nimaviridae
Myoviridae
Siphoviridae
Poxviridae
Nimaviridae
Myoviridae
Nimaviridae
Siphoviridae
Siphoviridae
Poxviridae
Siphoviridae
Nimaviridae
Poxviridae
Poxviridae
Siphoviridae
Nimaviridae
norank
Nimaviridae
Poxviridae
Siphoviridae
Nimaviridae
Myoviridae
Myoviridae
Siphoviridae
Podoviridae
Poxviridae
Poxviridae
Nimaviridae
Poxviridae
Nimaviridae
norank
Siphoviridae
Siphoviridae
Nimaviridae
Poxviridae
Siphoviridae
Poxviridae
Myoviridae
Siphoviridae
Siphoviridae
Siphoviridae
Poxviridae
Nimaviridae
Nimaviridae
Siphoviridae
Nimaviridae
Siphoviridae
Nimaviridae
Nimaviridae
Nimaviridae
Poxviridae
norank
Nimaviridae
Siphoviridae
Podoviridae
Poxviridae
Nimaviridae
Siphoviridae
Siphoviridae
Siphoviridae
Podoviridae
Nimaviridae
Poxviridae
Siphoviridae
Poxviridae
Nimaviridae
Poxviridae
Poxviridae
Podoviridae
Siphoviridae
Siphoviridae
Nimaviridae
Nimaviridae
Poxviridae
Poxviridae
Poxviridae
Nimaviridae
Poxviridae
Nimaviridae
Nimaviridae
Poxviridae
Siphoviridae
Poxviridae
Nimaviridae
Siphoviridae
Nimaviridae
Poxviridae
Myoviridae
Myoviridae
Siphoviridae
Nimaviridae
Poxviridae
Poxviridae
Siphoviridae
Poxviridae
Siphoviridae
Nimaviridae
Poxviridae
Nimaviridae
Poxviridae
Podoviridae
Myoviridae
Siphoviridae
Poxviridae
Poxviridae
Nimaviridae
Siphoviridae
Poxviridae
Poxviridae
Nimaviridae
Siphoviridae
Nimaviridae
Nimaviridae
Siphoviridae
Myoviridae
Siphoviridae
Siphoviridae
Siphoviridae
Genomoviridae
Poxviridae
Podoviridae
Siphoviridae
Nimaviridae
Poxviridae
Nimaviridae
Poxviridae
Poxviridae
Poxviridae
Poxviridae
Nimaviridae
Nimaviridae
Nimaviridae
Siphoviridae
Poxviridae
Siphoviridae
Siphoviridae
Nimaviridae
Poxviridae
Poxviridae
Siphoviridae
Siphoviridae
Nimaviridae
Poxviridae
Nimaviridae
Nimaviridae
Siphoviridae
Siphoviridae
Nimaviridae
Poxviridae
Nimaviridae
Nimaviridae
Poxviridae
Siphoviridae
Nimaviridae
Myoviridae
Poxviridae
Nimaviridae
Poxviridae
Siphoviridae
Siphoviridae
Poxviridae
Siphoviridae
Siphoviridae
Siphoviridae
Poxviridae
Poxviridae
Nimaviridae
Nimaviridae
Nimaviridae
Siphoviridae
Poxviridae
Siphoviridae
Poxviridae
Nimaviridae
Poxviridae
Siphoviridae
Poxviridae
Poxviridae
Poxviridae
Nimaviridae
Poxviridae
Myoviridae
Siphoviridae
Siphoviridae
Nimaviridae
Siphoviridae
Siphoviridae
Siphoviridae
Myoviridae
Myoviridae
Poxviridae
norank
Siphoviridae
Nimaviridae
Poxviridae
Siphoviridae
Siphoviridae
Nimaviridae
Poxviridae
Nimaviridae
Nimaviridae
Siphoviridae
Siphoviridae
Poxviridae
Poxviridae
Nimaviridae
Myoviridae
Siphoviridae
Podoviridae
Nimaviridae
Myoviridae
Siphoviridae
Poxviridae
Poxviridae
Nimaviridae
Siphoviridae
Poxviridae
Poxviridae
Poxviridae
Poxviridae
Myoviridae
Siphoviridae
Poxviridae
Siphoviridae
Nimaviridae
Siphoviridae
Myoviridae
Siphoviridae
Poxviridae
Siphoviridae
Siphoviridae
Nimaviridae
Siphoviridae
Poxviridae
Siphoviridae
Myoviridae
Nimaviridae
Nimaviridae
Podoviridae
Poxviridae
Nimaviridae
Nimaviridae
Poxviridae
Siphoviridae
Nimaviridae
Poxviridae
Siphoviridae
Poxviridae
Nimaviridae
Nimaviridae
Nimaviridae
Nimaviridae
Siphoviridae
Poxviridae
Myoviridae
Nimaviridae
Siphoviridae
Siphoviridae
Myoviridae
Poxviridae
Poxviridae
Poxviridae
Siphoviridae
Siphoviridae
Siphoviridae
Siphoviridae
Poxviridae
Nimaviridae
Nimaviridae
Microviridae
Poxviridae
Poxviridae
Siphoviridae
Siphoviridae
Siphoviridae
Podoviridae
Poxviridae
Siphoviridae
Podoviridae
Poxviridae
Myoviridae
Siphoviridae
Poxviridae
Siphoviridae
Siphoviridae
Siphoviridae
Siphoviridae
Podoviridae
Siphoviridae
Siphoviridae
Poxviridae
Podoviridae
Poxviridae
Siphoviridae
Herpesviridae
Siphoviridae
Poxviridae
Poxviridae
Poxviridae
Poxviridae
Poxviridae
Poxviridae
Myoviridae
Poxviridae
Nimaviridae
Nimaviridae
Siphoviridae
Poxviridae
Nimaviridae
Siphoviridae
Nimaviridae
Nimaviridae
Myoviridae
Siphoviridae
Phycodnaviridae
Poxviridae
Poxviridae
Poxviridae
Myoviridae
Nimaviridae
Podoviridae
Myoviridae
Nimaviridae
Siphoviridae
Nimaviridae
Siphoviridae
Siphoviridae
Siphoviridae
Siphoviridae
Poxviridae
Siphoviridae
Nimaviridae
Nimaviridae
Siphoviridae
Nimaviridae
Herpesviridae
Poxviridae
Siphoviridae
Nimaviridae
Poxviridae
Nimaviridae
Poxviridae
Nimaviridae
Poxviridae
Myoviridae
Myoviridae
Poxviridae
Nimaviridae
Myoviridae
Poxviridae
Nimaviridae
Siphoviridae
Siphoviridae
Siphoviridae
Siphoviridae
Siphoviridae
Poxviridae
Myoviridae
Siphoviridae
Podoviridae
Nimaviridae
Podoviridae
Myoviridae
Poxviridae
Poxviridae
Nimaviridae
Poxviridae
Siphoviridae
Poxviridae
Genomoviridae
Nimaviridae
Poxviridae
Nimaviridae
Nimaviridae
Siphoviridae
Myoviridae
Siphoviridae
Poxviridae
Poxviridae
Nimaviridae
Poxviridae
Myoviridae
Nimaviridae
Nimaviridae
Nimaviridae
Poxviridae
Nimaviridae
Nimaviridae
Nimaviridae
Siphoviridae
Myoviridae
Poxviridae
Siphoviridae
Siphoviridae
Siphoviridae
Siphoviridae
Myoviridae
Myoviridae
Nimaviridae
Nimaviridae
Nimaviridae
Nimaviridae
Siphoviridae
norank
Siphoviridae
Nimaviridae
Siphoviridae
Poxviridae
Siphoviridae
Siphoviridae
Poxviridae
Siphoviridae
Nimaviridae
Poxviridae
Poxviridae
Siphoviridae
Siphoviridae
Nimaviridae
Nimaviridae
Poxviridae
Poxviridae
Podoviridae
Siphoviridae
Siphoviridae
Microviridae
Nimaviridae
Poxviridae
Siphoviridae
Siphoviridae
Nimaviridae
norank
Poxviridae
Poxviridae
Siphoviridae
Nimaviridae
norank
Siphoviridae
Nimaviridae
Siphoviridae
Siphoviridae
Siphoviridae
Nimaviridae
Siphoviridae
Poxviridae
Poxviridae
Poxviridae
Nimaviridae
Siphoviridae
Siphoviridae
Nimaviridae
Nimaviridae
Nimaviridae
Siphoviridae
Nimaviridae
Myoviridae
Poxviridae
Myoviridae
Poxviridae
Poxviridae
Poxviridae
Nimaviridae
Myoviridae
Nimaviridae
Poxviridae
Nimaviridae
Myoviridae
Nimaviridae
Microviridae
Nimaviridae
Siphoviridae
norank
Poxviridae
Poxviridae
Nimaviridae
Siphoviridae
Nimaviridae
Poxviridae
Myoviridae
norank
Myoviridae
Poxviridae
Nimaviridae
Nimaviridae
Nimaviridae
Microviridae
Microviridae
Microviridae
Microviridae
Microviridae
Circoviridae
Microviridae
Siphoviridae
Genomoviridae
Siphoviridae
Podoviridae
Poxviridae
norank
Poxviridae
Siphoviridae
Siphoviridae
Siphoviridae
Poxviridae
Siphoviridae
Myoviridae
Siphoviridae
norank
Siphoviridae
Siphoviridae
Siphoviridae
Myoviridae
Genomoviridae
norank
Siphoviridae
Siphoviridae
norank
Siphoviridae
Podoviridae
Myoviridae
Poxviridae
Myoviridae
Siphoviridae
Poxviridae
Siphoviridae
Siphoviridae
Podoviridae
Myoviridae
Siphoviridae
Siphoviridae
Herpesviridae
Siphoviridae
Poxviridae
Siphoviridae
Poxviridae
Poxviridae
Siphoviridae
Siphoviridae
Siphoviridae
Siphoviridae
Poxviridae
Poxviridae
Siphoviridae
Poxviridae
Retroviridae
Poxviridae
Myoviridae
Myoviridae
Podoviridae
Siphoviridae
Poxviridae
Podoviridae
Poxviridae
Poxviridae
Siphoviridae
Poxviridae
Poxviridae
Poxviridae
Poxviridae
Poxviridae
Poxviridae
Poxviridae
Poxviridae
Poxviridae
Poxviridae
Myoviridae
Poxviridae
Poxviridae
Siphoviridae
Myoviridae
Siphoviridae
Myoviridae
Poxviridae
Siphoviridae
Poxviridae
Poxviridae
Podoviridae
Myoviridae
Retroviridae
Poxviridae
Myoviridae
Poxviridae
Circoviridae
Circoviridae
Inoviridae
Poxviridae
Nimaviridae
Nimaviridae
Poxviridae
Podoviridae
Siphoviridae
Siphoviridae
Siphoviridae
Nimaviridae
Poxviridae
Poxviridae
Siphoviridae
Nimaviridae
Nimaviridae
Siphoviridae
Nimaviridae
Nimaviridae
Myoviridae
Nimaviridae
Nimaviridae
Siphoviridae
Nimaviridae
Siphoviridae
Nimaviridae
Siphoviridae
Myoviridae
Inoviridae
Genomoviridae
Siphoviridae
Nimaviridae
Siphoviridae
Nimaviridae
Poxviridae
Poxviridae
Siphoviridae
Poxviridae
Siphoviridae
Nimaviridae
Nimaviridae
Poxviridae
Siphoviridae
Myoviridae
Siphoviridae
Myoviridae
Poxviridae
Nimaviridae
Poxviridae
Nimaviridae
Siphoviridae
Nimaviridae
Nimaviridae
Poxviridae
Nimaviridae
Poxviridae
Poxviridae
Poxviridae
Siphoviridae
Myoviridae
Poxviridae
Siphoviridae
Siphoviridae
Siphoviridae
Poxviridae
Poxviridae
Poxviridae
Siphoviridae
Genomoviridae
Nimaviridae
Poxviridae
Siphoviridae
Nimaviridae
Nimaviridae
Myoviridae
Siphoviridae
Poxviridae
Siphoviridae
Poxviridae
Nimaviridae
Myoviridae
Siphoviridae
Nimaviridae
Poxviridae
Siphoviridae
Nimaviridae
Nimaviridae
Siphoviridae
Siphoviridae
Poxviridae
Poxviridae
Poxviridae
Nimaviridae
Siphoviridae
Poxviridae
Poxviridae
Nimaviridae
Nimaviridae
Nimaviridae
Nimaviridae
Siphoviridae
Siphoviridae
Poxviridae
Nimaviridae
Siphoviridae
Poxviridae
Myoviridae
Siphoviridae
Siphoviridae
norank
Siphoviridae
Poxviridae
Siphoviridae
Nimaviridae
Siphoviridae
Poxviridae
Siphoviridae
Nimaviridae
Siphoviridae
Siphoviridae
Myoviridae
Nimaviridae
Nimaviridae
Myoviridae
Siphoviridae
Nimaviridae
Siphoviridae
Microviridae
Siphoviridae
Siphoviridae
Poxviridae
Nimaviridae
Nimaviridae
Nimaviridae
Poxviridae
Nimaviridae
Poxviridae
Siphoviridae
Siphoviridae
Nimaviridae
Poxviridae
Siphoviridae
Siphoviridae
Poxviridae
Poxviridae
Nimaviridae
Nimaviridae
Podoviridae
Siphoviridae
Siphoviridae
Myoviridae
Myoviridae
Myoviridae
Myoviridae
Nimaviridae
Nimaviridae
Myoviridae
Poxviridae
Nimaviridae
Siphoviridae
Nimaviridae
Nimaviridae
Nimaviridae
Siphoviridae
Poxviridae
Siphoviridae
Nimaviridae
Nimaviridae
Poxviridae
Poxviridae
Poxviridae
Poxviridae
Microviridae
Siphoviridae
Siphoviridae
Nimaviridae
Nimaviridae
Siphoviridae
Nimaviridae
Nimaviridae
Poxviridae
Poxviridae
Siphoviridae
Nimaviridae
Nimaviridae
Nimaviridae
Nimaviridae
Nimaviridae
Microviridae
Poxviridae
Siphoviridae
Poxviridae
Poxviridae
Nimaviridae
Poxviridae
Nimaviridae
Nimaviridae
Poxviridae
Poxviridae
Siphoviridae
Nimaviridae
Poxviridae
Nimaviridae
Siphoviridae
Myoviridae
Nimaviridae
Siphoviridae
Poxviridae
Poxviridae
Siphoviridae
Poxviridae
Nimaviridae
Poxviridae
Poxviridae
Nimaviridae
Nimaviridae
Poxviridae
Poxviridae
Siphoviridae
Nimaviridae
Siphoviridae
Poxviridae
Siphoviridae
norank
Siphoviridae
Nimaviridae
Siphoviridae
Siphoviridae
Myoviridae
Poxviridae
Nimaviridae
Siphoviridae
Nimaviridae
Poxviridae
Siphoviridae
Siphoviridae
Nimaviridae
Nimaviridae
Poxviridae
Nimaviridae
Nimaviridae
Poxviridae
Siphoviridae
Poxviridae
Poxviridae
Nimaviridae
Siphoviridae
Siphoviridae
Siphoviridae
Poxviridae
Siphoviridae
Nimaviridae
Siphoviridae
Poxviridae
Nimaviridae
Siphoviridae
Poxviridae
Inoviridae
Mimiviridae
Nimaviridae
Poxviridae
Nimaviridae
Siphoviridae
Myoviridae
Nimaviridae
Nimaviridae
Poxviridae
Nimaviridae
Poxviridae
Nimaviridae
Siphoviridae
Siphoviridae
Poxviridae
Nimaviridae
Poxviridae
Nimaviridae
Poxviridae
Nimaviridae
Poxviridae
Poxviridae
Nimaviridae
Siphoviridae
Poxviridae
Poxviridae
Siphoviridae
Poxviridae
Siphoviridae
Siphoviridae
Poxviridae
Siphoviridae
Nimaviridae
Poxviridae
Poxviridae
Nimaviridae
Siphoviridae
Poxviridae
Poxviridae
Siphoviridae
Poxviridae
Siphoviridae
Myoviridae
Siphoviridae
Nimaviridae
Nimaviridae
Siphoviridae
Poxviridae
Siphoviridae
Nimaviridae
Siphoviridae
Nimaviridae
Poxviridae
Nimaviridae
Nimaviridae
Poxviridae
Poxviridae
Nimaviridae
Siphoviridae
Nimaviridae
Siphoviridae
Siphoviridae
Nimaviridae
Siphoviridae
Nimaviridae
Poxviridae
Siphoviridae
Microviridae
Genomoviridae
Microviridae
Myoviridae
Baculoviridae
Phycodnaviridae
Microviridae
Siphoviridae
Podoviridae
Podoviridae
Microviridae
Microviridae
Siphoviridae
Microviridae
Siphoviridae
Siphoviridae
Microviridae
Microviridae
Microviridae
Microviridae
Microviridae
Microviridae
Microviridae
Phycodnaviridae
Mimiviridae
Myoviridae
Siphoviridae
Microviridae
Myoviridae
Siphoviridae
Podoviridae
Podoviridae
Podoviridae
Siphoviridae
Siphoviridae
Podoviridae
Podoviridae
Microviridae
Siphoviridae
Siphoviridae
Siphoviridae
Siphoviridae
Circoviridae
Siphoviridae
Podoviridae
Siphoviridae
Inoviridae
Myoviridae
Circoviridae
Microviridae
Mimiviridae
Microviridae
Circoviridae
Circoviridae
Siphoviridae
Microviridae
Microviridae
Siphoviridae
Microviridae
Microviridae
Microviridae
Circoviridae
Microviridae
Microviridae
norank
Microviridae
Poxviridae
Poxviridae
Myoviridae
Siphoviridae
Myoviridae
Siphoviridae
Inoviridae
Siphoviridae
Poxviridae
Siphoviridae
Siphoviridae
Baculoviridae
Siphoviridae
Siphoviridae
Mimiviridae
Phycodnaviridae
Poxviridae
Siphoviridae
Siphoviridae
Siphoviridae
Siphoviridae
Siphoviridae
Siphoviridae
Siphoviridae
Siphoviridae
Siphoviridae
Siphoviridae
Microviridae
Microviridae
Microviridae
Circoviridae
Circoviridae
norank
Microviridae
Microviridae
norank
Microviridae
Microviridae
norank
norank
Circoviridae
Podoviridae
Poxviridae
Poxviridae
Poxviridae
Siphoviridae
Siphoviridae
Poxviridae
Poxviridae
Poxviridae
Poxviridae
Iridoviridae
Poxviridae
Poxviridae
Poxviridae
Poxviridae
Poxviridae
Poxviridae
Poxviridae
Poxviridae
Siphoviridae
Poxviridae
Siphoviridae
Poxviridae
Siphoviridae
Siphoviridae
Poxviridae
Siphoviridae
Siphoviridae
Siphoviridae
Siphoviridae
Siphoviridae
Poxviridae
Siphoviridae
Siphoviridae
Myoviridae
Poxviridae
Poxviridae
Poxviridae
Siphoviridae
Poxviridae
Podoviridae
Poxviridae
Siphoviridae
Poxviridae
Poxviridae
Siphoviridae
Poxviridae
Poxviridae
Poxviridae
Poxviridae
Poxviridae
Siphoviridae
Poxviridae
Siphoviridae
Poxviridae
Poxviridae
Siphoviridae
Poxviridae
Siphoviridae
norank
Mimiviridae
Myoviridae
Poxviridae
Nimaviridae
Podoviridae
Poxviridae
Siphoviridae
Siphoviridae
Poxviridae
Poxviridae
Poxviridae
Poxviridae
Poxviridae
Siphoviridae
Siphoviridae
Poxviridae
Poxviridae
Poxviridae
Siphoviridae
Poxviridae
Poxviridae
Poxviridae
Poxviridae
Poxviridae
Siphoviridae
Poxviridae
Poxviridae
Siphoviridae
Poxviridae
Siphoviridae
Siphoviridae
Myoviridae
Siphoviridae
Siphoviridae
Siphoviridae
Poxviridae
Poxviridae
Nimaviridae
Podoviridae
Myoviridae
Poxviridae
Siphoviridae
Poxviridae
Poxviridae
Poxviridae
Poxviridae
Poxviridae
Poxviridae
Poxviridae
Poxviridae
Poxviridae
Poxviridae
Poxviridae
Siphoviridae
Poxviridae
Retroviridae
Retroviridae
Poxviridae
Poxviridae
Siphoviridae
Poxviridae
Poxviridae
Poxviridae
Myoviridae
Siphoviridae
Poxviridae
Siphoviridae
Siphoviridae
Poxviridae
Poxviridae
Poxviridae
Poxviridae
Poxviridae
Poxviridae
Poxviridae
Myoviridae
Microviridae
Microviridae
Circoviridae
norank
Microviridae
Microviridae
Microviridae
Microviridae
Poxviridae
Siphoviridae
norank
Siphoviridae
Poxviridae
Poxviridae
Poxviridae
Poxviridae
Poxviridae
Poxviridae
Poxviridae
Siphoviridae
Myoviridae
Poxviridae
Siphoviridae
Poxviridae
Siphoviridae
Poxviridae
Siphoviridae
Poxviridae
Podoviridae
Poxviridae
Poxviridae
Poxviridae
Poxviridae
Papillomaviridae
Poxviridae
Poxviridae
Siphoviridae
Poxviridae
Poxviridae
Poxviridae
Inoviridae
Siphoviridae
Siphoviridae
Poxviridae
Retroviridae
Poxviridae
Poxviridae
Poxviridae
Poxviridae
Poxviridae
Poxviridae
Poxviridae
Poxviridae
Poxviridae
Siphoviridae
Poxviridae
Papillomaviridae
Myoviridae
Siphoviridae
Siphoviridae
Poxviridae
Myoviridae
Poxviridae
Poxviridae
Poxviridae
Siphoviridae
Siphoviridae
Poxviridae
Myoviridae
Poxviridae
Poxviridae
Poxviridae
Poxviridae
Siphoviridae
Poxviridae
Poxviridae
Poxviridae
Siphoviridae
Poxviridae
Poxviridae
Poxviridae
Marseilleviridae
Poxviridae
Siphoviridae
Poxviridae
Siphoviridae
Siphoviridae
Siphoviridae
Poxviridae
Poxviridae
Poxviridae
Siphoviridae
Poxviridae
Poxviridae
Poxviridae
Poxviridae
Siphoviridae
Poxviridae
Siphoviridae
Poxviridae
Poxviridae
Poxviridae
Poxviridae
Poxviridae
Poxviridae
Poxviridae
Poxviridae
Poxviridae
Poxviridae
Nimaviridae
Poxviridae
Siphoviridae
Siphoviridae
Siphoviridae
Poxviridae
Poxviridae
Siphoviridae
Poxviridae
Poxviridae
Poxviridae
Poxviridae
Poxviridae
Microviridae
Circoviridae
Circoviridae
Podoviridae
Microviridae
Siphoviridae
Phycodnaviridae
Siphoviridae
Poxviridae
Siphoviridae
Poxviridae
Poxviridae
Poxviridae
Nimaviridae
Poxviridae
Poxviridae
Nimaviridae
Poxviridae
Myoviridae
Poxviridae
Poxviridae
Poxviridae
Poxviridae
Poxviridae
Poxviridae
Siphoviridae
Poxviridae
Poxviridae
Nimaviridae
Poxviridae
Myoviridae
Poxviridae
Circoviridae
Poxviridae
Poxviridae
Poxviridae
Herelleviridae
Siphoviridae
Poxviridae
Podoviridae
Poxviridae
Myoviridae
Poxviridae
Poxviridae
Poxviridae
Podoviridae
Poxviridae
Siphoviridae
Nimaviridae
Siphoviridae
Poxviridae
Poxviridae
Podoviridae
Poxviridae
Microviridae
Siphoviridae
Myoviridae
norank
Microviridae
Microviridae
Microviridae
Siphoviridae
Podoviridae
norank
norank
Microviridae
Alloherpesviridae
norank
Microviridae
Microviridae
Siphoviridae
Siphoviridae
Myoviridae
Siphoviridae
Siphoviridae
Poxviridae
Mimiviridae
Myoviridae
Microviridae
norank
Siphoviridae
Microviridae
Podoviridae
Siphoviridae
Siphoviridae
Microviridae
Circoviridae
Phycodnaviridae
Microviridae
Siphoviridae
Siphoviridae
Microviridae
Poxviridae
Myoviridae
Myoviridae
norank
Circoviridae
Podoviridae
Myoviridae
Microviridae
Microviridae
Phycodnaviridae
Siphoviridae
Circoviridae
Microviridae
Myoviridae
Genomoviridae
Podoviridae
Microviridae
Circoviridae
Microviridae
Podoviridae
Circoviridae
Phycodnaviridae
Siphoviridae
Poxviridae
Poxviridae
Siphoviridae
Siphoviridae
Siphoviridae
Poxviridae
Siphoviridae
Poxviridae
Siphoviridae
Siphoviridae
Siphoviridae
Siphoviridae
Microviridae
Myoviridae
Poxviridae
Poxviridae
Siphoviridae
Siphoviridae
Siphoviridae
Podoviridae
Siphoviridae
Poxviridae
Siphoviridae
Siphoviridae
Siphoviridae
Siphoviridae
Poxviridae
Myoviridae
Myoviridae
Siphoviridae
Siphoviridae
Siphoviridae
Phycodnaviridae
Siphoviridae
Siphoviridae
Mimiviridae
Myoviridae
Poxviridae
Siphoviridae
Poxviridae
Siphoviridae
norank
norank
Myoviridae
Myoviridae
Poxviridae
Siphoviridae
Siphoviridae
Inoviridae
Myoviridae
Siphoviridae
Siphoviridae
Podoviridae
Siphoviridae
Siphoviridae
Siphoviridae
Myoviridae
Poxviridae
Podoviridae
Siphoviridae
Siphoviridae
Siphoviridae
Siphoviridae
Siphoviridae
Myoviridae
Siphoviridae
Retroviridae
Siphoviridae
Siphoviridae
Podoviridae
Myoviridae
Siphoviridae
Siphoviridae
Siphoviridae
Rhabdoviridae
Poxviridae
Myoviridae
Poxviridae
Siphoviridae
Siphoviridae
Myoviridae
Siphoviridae
Siphoviridae
Myoviridae
Siphoviridae
Poxviridae
Siphoviridae
Poxviridae
Mimiviridae
Siphoviridae
Siphoviridae
Myoviridae
Myoviridae
Siphoviridae
Poxviridae
Siphoviridae
Myoviridae
Poxviridae
Siphoviridae
Siphoviridae
Siphoviridae
Myoviridae
Siphoviridae
Myoviridae
Myoviridae
Siphoviridae
Siphoviridae
Myoviridae
Siphoviridae
Siphoviridae
Myoviridae
Siphoviridae
Myoviridae
Myoviridae
Siphoviridae
Siphoviridae
Myoviridae
Poxviridae
Poxviridae
Poxviridae
Poxviridae
Siphoviridae
Siphoviridae
Poxviridae
Poxviridae
Myoviridae
Poxviridae
Siphoviridae
Siphoviridae
Poxviridae
Poxviridae
Poxviridae
Siphoviridae
Poxviridae
Poxviridae
Siphoviridae
Poxviridae
Myoviridae
Siphoviridae
Siphoviridae
Siphoviridae
Poxviridae
Poxviridae
Poxviridae
Poxviridae
Myoviridae
Poxviridae
Poxviridae
Siphoviridae
Siphoviridae
Retroviridae
Poxviridae
Siphoviridae
Poxviridae
Poxviridae
Poxviridae
Poxviridae
Siphoviridae
Poxviridae
Poxviridae
Poxviridae
Siphoviridae
Poxviridae
Poxviridae
Siphoviridae
Poxviridae
Poxviridae
[truncated: 447 more rows]
