# Supplementary material for: Environmental viromes reveal global virosphere of deep-sea RNA viruses
Source: Research Square preprint supplement (doi:10.21203/rs.3.rs-1294962/v1), 2022-02-10
Supplement: Supplementary file 4 [file 72827bf24b8a9c24f5e90b61.xlsx]

## Sheet: Table S1
Table S1. The information of samples.
Sample	Clean data (Mb)	Total reads	Sample location		Depth (m)	Habitat	Ocean region
DP002	4908.52	20889252	33.10°W	6.00°N	2516	Hydrothermal vent	Atlantic Ocean
DP003	4821.47	19979890	110.20°E	17.00°N	1250	Cold seep	Pacific Ocean
DP004	5150.92	22351248	110.30°E	16.80°N	1340	Cold seep	Pacific Ocean
DP005	4445.08	19415548	110.30°E	17.20°N	1100	Cold seep	Pacific Ocean
DP006	4631.56	20110810	110.50°E	16.70°N	1430	Cold seep	Pacific Ocean
DP007	7078.69	30465640	111.00°E	17.00°N	1450	Cold seep	Pacific Ocean
DP008	6608.28	27549394	110.60°E	16.90°N	1350	Cold seep	Pacific Ocean
DP009	5838.87	25233070	111.10°E	16.80°N	1500	Cold seep	Pacific Ocean
DP010	5866.17	23965242	110.80°E	17.10°N	1400	Cold seep	Pacific Ocean
DP026	5584.47	24501650	63.72°E	3.69°N	3550	Hydrothermal vent	Indian Ocean
DP031	6276.7	27773352	14.31°W	13.36°S	3142	Hydrothermal vent	Atlantic Ocean
DP040	5047.98	21712568	11.92°W	19.35°S	2597	Hydrothermal vent	Atlantic Ocean
DP042	5543.85	23124588	12.00°W	19.27°S	2761	Hydrothermal vent	Atlantic Ocean
DP046	5740.6	24697286	12.85°W	18.04°S	3307	Hydrothermal vent	Atlantic Ocean
DP047	4802.61	20803924	12.70°W	18.49°S	2146	Hydrothermal vent	Atlantic Ocean
DP049	4720.97	20742616	12.78°W	18.49°S	2146	Hydrothermal vent	Atlantic Ocean
DP052	4269.44	18587706	49.83°E	37.79°S	2779	Hydrothermal vent	Indian Ocean
DP053	4609.93	20389034	49.75°E	37.79°S	2295	Hydrothermal vent	Indian Ocean
DP055	4729.79	20205240	47.20°E	38.20°S	2284	Hydrothermal vent	Indian Ocean
DP057	6904.4	28974410	46.76°E	38.71°S	2143	Hydrothermal vent	Indian Ocean
DP058	4186.13	18183530	47.01°E	38.68°S	2826	Hydrothermal vent	Indian Ocean
DP059	4666.7	20552812	154.25°W	8.50°N	5335	Ocean basin	Pacific Ocean
DP060	5184.73	21729632	153.33°W	10.54°N	5133	Ocean basin	Pacific Ocean
DP078	6885.43	29542800	174.50°W	9.72°N	5868	Ocean basin	Pacific Ocean
DP081	5282.56	22073246	49.10°E	37.85°S	2058	Hydrothermal vent	Indian Ocean
DP082	11243.2	45941674	49.66°E	37.79°S	2625	Hydrothermal vent	Indian Ocean
DP086	5649.21	24917626	70.04°E	25.32°S	2434	Hydrothermal vent	Indian Ocean
DP088	4590.07	20456712	54.21°E	34.97°S	3206	Hydrothermal vent	Indian Ocean
DP089	4335.41	19022924	54.59°E	34.84°S	3239	Hydrothermal vent	Indian Ocean
DP091	6747.31	28442572	50.37°E	37.05°S	1902	Hydrothermal vent	Indian Ocean
DP095	4731.7	21203798	49.79°E	37.79°S	2987	Hydrothermal vent	Indian Ocean
DP098	4326.48	18971128	49.55°E	37.68°S	2294	Hydrothermal vent	Indian Ocean
DP099	7660.06	32112450	49.58°E	37.73°S	2828	Hydrothermal vent	Indian Ocean
DP100	4575.18	20424876	47.42°E	38.77°S	2699	Hydrothermal vent	Indian Ocean
DP117	6968.99	29641094	52.67°E	35.23°S	3210	Hydrothermal vent	Indian Ocean
DP118	5810.43	24464166	49.54°E	37.71°S	2502	Hydrothermal vent	Indian Ocean
DP119	4917.16	21355788	49.45°E	37.77°S	3189	Hydrothermal vent	Indian Ocean
DP120	3540.47	15755956	48.37°E	38.28°S	2864	Hydrothermal vent	Indian Ocean
DP122	4878.77	21062868	49.39°E	37.71°S	2380	Hydrothermal vent	Indian Ocean
DP123	3873.91	16593598	48.44°E	38.04°S	2318	Hydrothermal vent	Indian Ocean
DP124	4022.08	17021962	48.60°E	38.10°S	2774	Hydrothermal vent	Indian Ocean
DP125	4802.75	20638468	48.29°E	38.06°S	2871	Hydrothermal vent	Indian Ocean
DP126	6648.37	28067636	48.33°E	38.15°S	2519	Hydrothermal vent	Indian Ocean
DP128	4314.27	18633112	46.63°E	38.87°S	3251	Hydrothermal vent	Indian Ocean
DP129	6592.95	27843584	55.36°E	34.44°S	3057	Hydrothermal vent	Indian Ocean
DP132	6981.59	29535376	49.81°E	37.94°S	1535	Hydrothermal vent	Indian Ocean
DP141	5266.92	22171720	51.75°E	37.50°S	1880	Hydrothermal vent	Indian Ocean
DP142	5243.47	21836108	50.85°E	37.65°S	2500	Hydrothermal vent	Indian Ocean
DP143	4811.9	20579212	51.02°E	37.56°S	2400	Hydrothermal vent	Indian Ocean
DP144	5569.6	23573120	49.65°E	37.86°S	2439	Hydrothermal vent	Indian Ocean
DP145	5586.74	23416934	49.66°E	37.86°S	2319	Hydrothermal vent	Indian Ocean
DP146	3980.98	17055926	48.60°E	38.17°S	2155	Hydrothermal vent	Indian Ocean
DP147	4946.28	21151666	48.85°E	37.99°S	2012	Hydrothermal vent	Indian Ocean
DP148	4479.67	18871868	151.50°E	18.20°N	5277	Seamount	Pacific Ocean
DP149	5133.38	22209272	161.61°E	20.80°N	5186	Seamount	Pacific Ocean
DP150	5112.33	22085824	63.84°E	3.70°N	3500	Hydrothermal vent	Indian Ocean
DP151	5804.81	24431966	51.73°E	37.47°S	1753	Hydrothermal vent	Indian Ocean
DP152	3977.36	17026192	49.66°E	27.78°S	2398	Hydrothermal vent	Indian Ocean
DP153	4071.88	17324954	63.92°E	27.78°S	3166	Hydrothermal vent	Indian Ocean
DP154	4900.09	21073374	49.14°E	37.99°S	2017	Hydrothermal vent	Indian Ocean
DP155	4386.68	18866026	48.44°E	37.98°S	1728	Hydrothermal vent	Indian Ocean
DP156	5376.17	22343776	48.48°E	38.00°S	2025	Hydrothermal vent	Indian Ocean
DP157	4680.32	20877066	49.77°E	37.79°S	1799	Hydrothermal vent	Indian Ocean
DP158	4480.93	19487024	48.43°E	37.99°S	1999	Hydrothermal vent	Indian Ocean
DP159	4239.38	18325088	48.86°E	38.13°S	1910	Hydrothermal vent	Indian Ocean
DP160	5083.01	22271382	49.49°E	37.53°S	2462	Hydrothermal vent	Indian Ocean
DP161	5687.5	23157682	48.31°E	38.36°S	3076	Hydrothermal vent	Indian Ocean
DP162	4514.41	19408980	48.29°E	38.42°S	2571	Hydrothermal vent	Indian Ocean
DP163	5391.28	23470760	54.36°E	34.95°S	1675	Hydrothermal vent	Indian Ocean
DP164	4165.98	18510900	54.23°E	34.87°S	3492	Hydrothermal vent	Indian Ocean
DP165	3907.9	15842554	46.97°E	38.73°S	2969	Hydrothermal vent	Indian Ocean
DP166	5212.86	22584672	46.89°E	38.67°S	2416	Hydrothermal vent	Indian Ocean
DP167	4121.79	17991690	47.10°E	38.68°S	2897	Hydrothermal vent	Indian Ocean
DP168	5264.6	22251204	47.25°E	38.67°S	2206	Hydrothermal vent	Indian Ocean
DP169	4449.17	19153270	50.37°E	37.59°S	2028	Hydrothermal vent	Indian Ocean
DP170	4917.86	22072626	50.37°E	37.65°S	2050	Hydrothermal vent	Indian Ocean
DP171	4325.71	18369116	49.75°E	37.78°S	2354	Hydrothermal vent	Indian Ocean
DP172	4455.28	18808680	49.56°E	37.87°S	2847	Hydrothermal vent	Indian Ocean
DP173	4431.14	19954834	49.77°E	37.80°S	2230	Hydrothermal vent	Indian Ocean
DP174	4227.06	18058566	49.73°E	37.78°S	2315	Hydrothermal vent	Indian Ocean
DP175	5533.88	23412234	49.73°E	37.92°S	1996	Hydrothermal vent	Indian Ocean
DP176	5144.78	22281752	52.94°E	35.90°S	2813	Hydrothermal vent	Indian Ocean
DP177	5307.62	22381336	49.58°E	37.72°S	2781	Hydrothermal vent	Indian Ocean
DP178	5437.63	22742856	47.53°E	38.81°S	2298	Hydrothermal vent	Indian Ocean
DP179	6145.08	25888410	158.81°E	20.12°N	5526.1	Seamount	Pacific Ocean
DP180	4468.56	19004372	158.81°E	20.12°N	5526.2	Seamount	Pacific Ocean
DP181	3735.05	16078438	158.81°E	20.12°N	5526	Seamount	Pacific Ocean
DP182	5227.03	22108500	160.24°E	20.18°N	4960	Seamount	Pacific Ocean
DP183	4949.28	21441388	154.24°W	8.51°N	5335	Ocean basin	Pacific Ocean
DP184	4038.01	17329780	154.25°W	13.00°N	5424	Ocean basin	Pacific Ocean
DP185	5381.5	22582958	154.26°W	13.00°N	5416	Ocean basin	Pacific Ocean
DP186	4490.2	19764588	154.62°E	16.63°N	5169	Seamount	Pacific Ocean
DP187	4071.73	17747446	153.60°E	17.20°N	5788	Seamount	Pacific Ocean
DP188	4928.83	20954380	152.40°E	17.83°N	5140	Seamount	Pacific Ocean
DP189	5319.32	23075264	157.21°W	10.00°N	5059	Ocean basin	Pacific Ocean
DP190	3711.42	15851308	157.27°W	9.99°N	5190	Ocean basin	Pacific Ocean
DP191	4056.62	18447748	169.21°W	10.00°N	4797	Ocean basin	Pacific Ocean
DP192	4276.09	18572390	172.20°W	10.00°N	5720	Ocean basin	Pacific Ocean
DP193	4531.67	20261198	174.53°W	9.73°N	5878	Ocean basin	Pacific Ocean
DP194	6332.31	26306398	178.20°W	10.00°N	6011	Ocean basin	Pacific Ocean
DP195	4691.75	20477688	179.14°E	10.00°N	6105	Seamount	Pacific Ocean
DP196	5363.39	22443502	176.21°E	10.00°N	5512	Seamount	Pacific Ocean
DP197	4130.02	18042976	176.21°W	10.00°N	5516	Ocean basin	Pacific Ocean
DP198	4776.64	21066986	154.26°W	11.01°N	5160	Ocean basin	Pacific Ocean
DP199	5572.12	23338310	154.33°W	10.09°N	5167	Ocean basin	Pacific Ocean
DP200	3897.7	16531660	154.34°W	10.00°N	5204	Ocean basin	Pacific Ocean
DP201	4990.89	21226830	154.40°W	9.80°N	5107	Ocean basin	Pacific Ocean
DP202	5232.37	22368316	154.30°W	9.80°N	5252	Ocean basin	Pacific Ocean
DP203	4379.3	18650160	154.20°W	9.76°N	5326	Ocean basin	Pacific Ocean
DP204	3915.96	17125440	154.19°W	9.69°N	5047	Ocean basin	Pacific Ocean
DP205	4226.41	17971878	154.39°W	9.70°N	5233	Ocean basin	Pacific Ocean
DP206	6147.85	26164948	154.63°W	9.69°N	5205	Ocean basin	Pacific Ocean
DP207	4957.49	20606848	154.76°W	9.69°N	5300	Ocean basin	Pacific Ocean
DP208	5798.87	24522776	154.82°W	9.63°N	5325	Ocean basin	Pacific Ocean
DP209	4505.88	19956066	154.70°W	9.63°N	5232	Ocean basin	Pacific Ocean
DP210	4422.38	19696688	154.57°W	9.64°N	5130	Ocean basin	Pacific Ocean
DP211	4700.7	20660830	154.45°W	9.63°N	5198	Ocean basin	Pacific Ocean
DP212	5471.21	24043522	154.32°W	9.64°N	5263	Ocean basin	Pacific Ocean
DP213	5078.09	21678254	154.19°W	9.64°N	5300	Ocean basin	Pacific Ocean
DP214	4686.61	21003388	154.50°W	9.57°N	5200	Ocean basin	Pacific Ocean
DP215	5775.64	24801802	154.82°W	9.51°N	5196	Ocean basin	Pacific Ocean
DP216	5554.07	23653908	154.76°W	9.50°N	5147	Ocean basin	Pacific Ocean
DP217	4814.54	20260316	154.57°W	9.51°N	5188	Ocean basin	Pacific Ocean
DP218	3801.3	16755764	154.45°W	9.50°N	5238	Ocean basin	Pacific Ocean
DP219	5400.28	22638072	154.33°W	9.51°N	5246	Ocean basin	Pacific Ocean
DP220	4812.42	20608940	154.60°W	10.20°N	5147	Ocean basin	Pacific Ocean
DP221	4836.59	20595246	154.29°W	10.52°N	5160	Ocean basin	Pacific Ocean
DP222	5207.18	22169520	161.89°E	19.97°N	4428	Seamount	Pacific Ocean
DP223	5080.18	21219780	161.30°E	19.00°N	5300	Seamount	Pacific Ocean
DP224	5648.53	24032566	156.98°E	20.22°N	5189	Seamount	Pacific Ocean
DP225	5708.27	24221126	160.24°E	20.16°N	4937	Seamount	Pacific Ocean
DP226	4490.32	19997728	160.81°E	20.40°N	1618	Seamount	Pacific Ocean
DP227	5358.86	24616324	161.60°E	20.80°N	5154	Seamount	Pacific Ocean
Total	673721	2889656790		Average	3545.3
