# Supplementary material for: Environmental viromes reveal global virosphere of deep-sea RNA viruses
Source: Research Square preprint supplement (doi:10.21203/rs.3.rs-1294962/v1), 2022-02-10
Supplement: Supplementary file 5 [file 95488cb640ddae5def586eee.xlsx]

## Sheet: Sheet1
Table S4. The circular genomes of deep-sea RNA viruses.
Circular viral genome	Length (bp)	Viral family	Viral species/strain	Host	Viral operational taxonomic units (vOTUs)	Contig number*
DSCRV-1	18595	_	_	_	vOTU-9200	DP010__2765
DSCRV-2	17892	_	_	_	vOTU-9418	DP010__3883
DSCRV-3	15983	_	_	_	vOTU-57615	DP189__7438
DSCRV-4	14361	_	_	_	vOTU-8352	DP009__1913
DSCRV-5	11936	_	_	_	vOTU-3753	DP007__1898
DSCRV-6	9408	_	_	_	vOTU-9931	DP031__1350
DSCRV-7	8981	_	_	_	vOTU-76527	DP197__815
DSCRV-8	8224	_	_	_	vOTU-37581	DP129__5545
DSCRV-9	7689	_	_	_	vOTU-38763	DP129__10575
DSCRV-10	7614	_	_	_	vOTU-58998	DP189__12536
DSCRV-11	7435	_	_	_	vOTU-29942	DP099__7085
DSCRV-12	7308	_	_	_	vOTU-19157	DP086__217
DSCRV-13	7093	_	_	_	vOTU-25007	DP089__346
DSCRV-14	7093	_	_	_	vOTU-52596	DP165__8338
DSCRV-15	6997	_	_	_	vOTU-71983	DP193__7919
DSCRV-16	6944	_	_	_	vOTU-14929	DP057__15856
DSCRV-17	6853	_	_	_	vOTU-79178	DP204__1123
DSCRV-18	6736	_	_	_	vOTU-10017	DP040__9
DSCRV-19	6736	_	_	_	vOTU-10319	DP049__540
DSCRV-20	6736	_	_	_	vOTU-17352	DP059__331
DSCRV-21	6736	_	_	_	vOTU-19208	DP086__1901
DSCRV-22	6736	_	_	_	vOTU-43705	DP150__128
DSCRV-23	6736	_	_	_	vOTU-43	DP002__1138
DSCRV-24	6736	_	_	_	vOTU-78878	DP202__2521
DSCRV-25	6626	_	_	_	vOTU-34770	DP125__8458
DSCRV-26	6361	_	_	_	vOTU-41693	DP147__1071
DSCRV-27	6318	_	_	_	vOTU-4462	DP007__4758
DSCRV-28	6199	_	_	_	vOTU-43715	DP150__372
DSCRV-29	6197	_	_	_	vOTU-17320	DP058__7741
DSCRV-30	6169	_	_	_	vOTU-79235	DP205__199
DSCRV-31	6150	_	_	_	vOTU-37794	DP129__6423
DSCRV-32	6135	_	_	_	vOTU-10045	DP040__863
DSCRV-33	6135	_	_	_	vOTU-43710	DP150__269
DSCRV-34	6099	_	_	_	vOTU-10386	DP049__2219
DSCRV-35	6099	_	_	_	vOTU-9819	DP026__274
DSCRV-36	6011	_	_	_	vOTU-80343	DP205__5577
DSCRV-37	5989	_	_	_	vOTU-33993	DP125__5438
DSCRV-38	5958	_	_	_	vOTU-19750	DP088__2474
DSCRV-39	5809	_	_	_	vOTU-84283	DP224__56
DSCRV-40	5766	_	_	_	vOTU-84810	DP225__309
DSCRV-41	5731	_	_	_	vOTU-65232	DP189__36054
DSCRV-42	5675	_	_	_	vOTU-12444	DP057__6414
DSCRV-43	5670	_	_	_	vOTU-76540	DP197__903
DSCRV-44	5597	_	_	_	vOTU-34356	DP125__6830
DSCRV-45	5593	_	_	_	vOTU-29273	DP099__3660
DSCRV-46	5525	_	_	_	vOTU-83265	DP218__2341
DSCRV-47	5522	_	_	_	vOTU-38058	DP129__7498
DSCRV-48	5486	_	_	_	vOTU-40959	DP132__70
DSCRV-49	5436	_	_	_	vOTU-29368	DP099__4129
DSCRV-50	5428	_	_	_	vOTU-56776	DP189__4380
DSCRV-51	5379	_	_	_	vOTU-76289	DP195__746
DSCRV-52	5379	_	_	_	vOTU-81770	DP211__208
DSCRV-53	5379	_	_	_	vOTU-83894	DP221__2135
DSCRV-54	5375	_	_	_	vOTU-19184	DP086__1146
DSCRV-55	5350	_	_	_	vOTU-32510	DP124__106
DSCRV-56	5350	_	_	_	vOTU-52437	DP165__3873
DSCRV-57	5350	_	_	_	vOTU-81117	DP209__8949
DSCRV-58	5305	_	_	_	vOTU-9735	DP010__5369
DSCRV-59	5302	_	_	_	vOTU-935	DP003__6516
DSCRV-60	5289	_	_	_	vOTU-35138	DP125__9875
DSCRV-61	5239	_	_	_	vOTU-10027	DP040__145
DSCRV-62	5176	_	_	_	vOTU-30457	DP117__1873
DSCRV-63	5160	_	_	_	vOTU-56533	DP189__3490
DSCRV-64	5141	_	_	_	vOTU-52157	DP164__2080
DSCRV-65	5126	_	_	_	vOTU-82893	DP217__1241
DSCRV-66	5120	_	_	_	vOTU-80123	DP205__4525
DSCRV-67	5084	_	_	_	vOTU-53190	DP166__5268
DSCRV-68	5080	_	_	_	vOTU-4494	DP007__4925
DSCRV-69	5073	_	_	_	vOTU-33558	DP125__3521
DSCRV-70	5029	_	_	_	vOTU-66062	DP189__39178
DSCRV-71	4992	_	_	_	vOTU-32548	DP124__651
DSCRV-72	4958	_	_	_	vOTU-23308	DP088__17945
DSCRV-73	4906	_	_	_	vOTU-1281	DP004__1209
DSCRV-74	4893	_	_	_	vOTU-16111	DP058__421
DSCRV-75	4892	_	_	_	vOTU-4100	DP007__3247
DSCRV-76	4888	_	_	_	vOTU-60115	DP189__16774
DSCRV-77	4887	_	_	_	vOTU-48640	DP160__4636
DSCRV-78	4863	_	_	_	vOTU-32764	DP125__421
DSCRV-79	4852	_	_	_	vOTU-8418	DP009__3205
DSCRV-80	4842	_	_	_	vOTU-57783	DP189__8021
DSCRV-81	4814	_	_	_	vOTU-63245	DP189__28530
DSCRV-82	4732	_	_	_	vOTU-59504	DP189__14471
DSCRV-83	4726	_	_	_	vOTU-70241	DP192__4072
DSCRV-84	4719	_	_	_	vOTU-52511	DP165__5968
DSCRV-85	4702	_	_	_	vOTU-64220	DP189__32296
DSCRV-86	4679	_	_	_	vOTU-32071	DP120__3573
DSCRV-87	4679	_	_	_	vOTU-52158	DP164__2088
DSCRV-88	4679	_	_	_	vOTU-72133	DP193__8610
DSCRV-89	4676	_	_	_	vOTU-8033	DP008__1790
DSCRV-90	4663	_	_	_	vOTU-31624	DP120__1223
DSCRV-91	4643	_	_	_	vOTU-10575	DP053__337
DSCRV-92	4643	_	_	_	vOTU-16142	DP058__621
DSCRV-93	4643	_	_	_	vOTU-25002	DP089__176
DSCRV-94	4643	_	_	_	vOTU-32226	DP120__4423
DSCRV-95	4643	_	_	_	vOTU-42256	DP149__1850
DSCRV-96	4643	_	_	_	vOTU-46908	DP158__22727
DSCRV-97	4643	_	_	_	vOTU-52067	DP164__1543
DSCRV-98	4643	_	_	_	vOTU-53557	DP169__77
DSCRV-99	4643	_	_	_	vOTU-53577	DP170__2
DSCRV-100	4643	_	_	_	vOTU-53948	DP173__1685
DSCRV-101	4643	_	_	_	vOTU-54805	DP183__413
DSCRV-102	4643	_	_	_	vOTU-61314	DP189__21201
DSCRV-103	4643	_	_	_	vOTU-69356	DP191__1474
DSCRV-104	4643	_	_	_	vOTU-73237	DP193__14073
DSCRV-105	4633	_	_	_	vOTU-16982	DP058__5658
DSCRV-106	4632	_	_	_	vOTU-9697	DP010__5211
DSCRV-107	4589	_	_	_	vOTU-84812	DP225__483
DSCRV-108	4538	_	_	_	vOTU-77382	DP198__2582
DSCRV-109	4531	_	_	_	vOTU-18216	DP081__3161
DSCRV-110	4491	_	_	_	vOTU-43785	DP151__1836
DSCRV-111	4490	_	_	_	vOTU-27811	DP098__4050
DSCRV-112	4488	_	_	_	vOTU-15120	DP057__16511
DSCRV-113	4471	_	_	_	vOTU-43845	DP153__334
DSCRV-114	4390	_	_	_	vOTU-33514	DP125__3341
DSCRV-115	4376	_	_	_	vOTU-62637	DP189__26249
DSCRV-116	4323	_	_	_	vOTU-79543	DP205__1656
DSCRV-117	4274	_	_	_	vOTU-27024	DP095__18318
DSCRV-118	4259	_	_	_	vOTU-26697	DP095__14124
DSCRV-119	4249	_	_	_	vOTU-41381	DP132__2730
DSCRV-120	4240	_	_	_	vOTU-53413	DP166__7088
DSCRV-121	4240	_	_	_	vOTU-85031	DP227__2754
DSCRV-122	4229	_	_	_	vOTU-27497	DP098__2498
DSCRV-123	4229	_	_	_	vOTU-34137	DP125__5954
DSCRV-124	4222	_	_	_	vOTU-4951	DP007__6582
DSCRV-125	4202	_	_	_	vOTU-12230	DP057__5686
DSCRV-126	4174	_	_	_	vOTU-33587	DP125__3681
DSCRV-127	4165	_	_	_	vOTU-27117	DP098__382
DSCRV-128	4137	_	_	_	vOTU-80247	DP205__5094
DSCRV-129	4127	_	_	_	vOTU-10625	DP055__1382
DSCRV-130	4127	_	_	_	vOTU-41562	DP142__1282
DSCRV-131	4127	_	_	_	vOTU-43926	DP154__1017
DSCRV-132	4127	_	_	_	vOTU-48342	DP159__2135
DSCRV-133	4127	_	_	_	vOTU-82700	DP213__2630
DSCRV-134	4127	_	_	_	vOTU-82839	DP216__1029
DSCRV-135	4127	_	_	_	vOTU-83745	DP220__3675
DSCRV-136	4127	_	_	_	vOTU-84218	DP223__615
DSCRV-137	4127	_	_	_	vOTU-84361	DP224__574
DSCRV-138	4125	_	_	_	vOTU-4040	DP007__2970
DSCRV-139	4115	_	_	_	vOTU-58404	DP189__10356
DSCRV-140	4115	_	_	_	vOTU-75071	DP193__22827
DSCRV-141	4094	_	_	_	vOTU-79563	DP205__1724
DSCRV-142	4080	_	_	_	vOTU-14946	DP057__15910
DSCRV-143	4066	_	_	_	vOTU-2689	DP006__6184
DSCRV-144	4057	_	_	_	vOTU-54854	DP184__882
DSCRV-145	4042	_	_	_	vOTU-52913	DP166__2784
DSCRV-146	4026	_	_	_	vOTU-1024	DP003__7282
DSCRV-147	4025	_	_	_	vOTU-57688	DP189__7683
DSCRV-148	3997	_	_	_	vOTU-25483	DP091__5519
DSCRV-149	3990	_	_	_	vOTU-50366	DP163__2358
DSCRV-150	3987	_	_	_	vOTU-4645	DP007__5461
DSCRV-151	3969	_	_	_	vOTU-13712	DP057__11220
DSCRV-152	3968	_	_	_	vOTU-18587	DP081__6092
DSCRV-153	3961	_	_	_	vOTU-32098	DP120__3774
DSCRV-154	3941	_	_	_	vOTU-16393	DP058__2033
DSCRV-155	3919	_	_	_	vOTU-66314	DP189__40126
DSCRV-156	3863	_	_	_	vOTU-6479	DP007__12513
DSCRV-157	3839	_	_	_	vOTU-6266	DP007__11683
DSCRV-158	3839	_	_	_	vOTU-69112	DP190__943
DSCRV-159	3829	_	_	_	vOTU-80064	DP205__4204
DSCRV-160	3822	_	_	_	vOTU-64541	DP189__33489
DSCRV-161	3812	_	_	_	vOTU-29015	DP099__2373
DSCRV-162	3802	_	_	_	vOTU-75172	DP193__23251
DSCRV-163	3782	_	_	_	vOTU-71309	DP193__4671
DSCRV-164	3759	_	_	_	vOTU-56128	DP189__2095
DSCRV-165	3729	_	_	_	vOTU-6949	DP007__14397
DSCRV-166	3688	_	_	_	vOTU-41217	DP132__1773
DSCRV-167	3674	_	_	_	vOTU-76361	DP196__1367
DSCRV-168	3653	_	_	_	vOTU-84920	DP226__2830
DSCRV-169	3638	_	_	_	vOTU-55533	DP188__1059
DSCRV-170	3635	_	_	_	vOTU-12833	DP057__7968
DSCRV-171	3623	_	_	_	vOTU-21714	DP088__11133
DSCRV-172	3621	_	_	_	vOTU-12640	DP057__7191
DSCRV-173	3617	_	_	_	vOTU-41791	DP148__922
DSCRV-174	3588	_	_	_	vOTU-79995	DP205__3826
DSCRV-175	3581	_	_	_	vOTU-25031	DP091__106
DSCRV-176	3573	_	_	_	vOTU-32426	DP122__2736
DSCRV-177	3559	_	_	_	vOTU-50374	DP163__2392
DSCRV-178	3556	_	_	_	vOTU-21299	DP088__9167
DSCRV-179	3535	_	_	_	vOTU-29794	DP099__6316
DSCRV-180	3530	_	_	_	vOTU-76762	DP197__2390
DSCRV-181	3527	_	_	_	vOTU-25201	DP091__1995
DSCRV-182	3526	_	_	_	vOTU-4854	DP007__6219
DSCRV-183	3502	_	_	_	vOTU-24818	DP088__24929
DSCRV-184	3474	_	_	_	vOTU-41292	DP132__2185
DSCRV-185	3444	_	_	_	vOTU-40835	DP129__19337
DSCRV-186	3442	_	_	_	vOTU-35188	DP125__10051
DSCRV-187	3438	_	_	_	vOTU-72121	DP193__8546
DSCRV-188	3417	_	_	_	vOTU-79833	DP205__3078
DSCRV-189	3408	_	_	_	vOTU-80254	DP205__5134
DSCRV-190	3407	_	_	_	vOTU-39255	DP129__12589
DSCRV-191	3405	_	_	_	vOTU-16769	DP058__4259
DSCRV-192	3403	_	_	_	vOTU-68190	DP189__47204
DSCRV-193	3385	_	_	_	vOTU-61848	DP189__23369
DSCRV-194	3382	_	_	_	vOTU-9411	DP010__3869
DSCRV-195	3364	_	_	_	vOTU-42171	DP149__1256
DSCRV-196	3354	_	_	_	vOTU-28580	DP099__334
DSCRV-197	3345	_	_	_	vOTU-28585	DP099__354
DSCRV-198	3339	_	_	_	vOTU-10348	DP049__1261
DSCRV-199	3325	_	_	_	vOTU-37124	DP129__3760
DSCRV-200	3323	_	_	_	vOTU-44957	DP158__5605
DSCRV-201	3317	_	_	_	vOTU-20458	DP088__5477
DSCRV-202	3297	_	_	_	vOTU-67017	DP189__42696
DSCRV-203	3294	_	_	_	vOTU-21349	DP088__9410
DSCRV-204	3263	_	_	_	vOTU-55356	DP186__3886
DSCRV-205	3256	Leviviridae	Leviviridae sp.	bacterium	vOTU-43719	DP150__435
DSCRV-206	3248	_	_	_	vOTU-49151	DP160__12632
DSCRV-207	3232	_	_	_	vOTU-1777	DP005__1872
DSCRV-208	3226	_	_	_	vOTU-78506	DP201__942
DSCRV-209	3222	_	_	_	vOTU-7988	DP008__1368
DSCRV-210	3192	_	_	_	vOTU-30198	DP117__143
DSCRV-211	3192	_	_	_	vOTU-3795	DP007__2064
DSCRV-212	3184	_	_	_	vOTU-44305	DP157__2159
DSCRV-213	3184	_	_	_	vOTU-74210	DP193__18600
DSCRV-214	3184	_	_	_	vOTU-81356	DP210__2468
DSCRV-215	3177	_	_	_	vOTU-6926	DP007__14311
DSCRV-216	3170	_	_	_	vOTU-29862	DP099__6695
DSCRV-217	3164	_	_	_	vOTU-74724	DP193__21122
DSCRV-218	3150	_	_	_	vOTU-12401	DP057__6268
DSCRV-219	3131	_	_	_	vOTU-17434	DP060__2085
DSCRV-220	3125	_	_	_	vOTU-71780	DP193__6981
DSCRV-221	3120	_	_	_	vOTU-18303	DP081__3817
DSCRV-222	3120	_	_	_	vOTU-72089	DP193__8411
DSCRV-223	3118	_	_	_	vOTU-6484	DP007__12531
DSCRV-224	3100	_	_	_	vOTU-48909	DP160__8626
DSCRV-225	3094	_	_	_	vOTU-41302	DP132__2231
DSCRV-226	3065	_	_	_	vOTU-2487	DP006__4645
DSCRV-227	3056	_	_	_	vOTU-28910	DP099__1947
DSCRV-228	3053	_	_	_	vOTU-51280	DP163__6660
DSCRV-229	3051	_	_	_	vOTU-23769	DP088__20012
DSCRV-230	3046	_	_	_	vOTU-66845	DP189__42058
DSCRV-231	3028	_	_	_	vOTU-17306	DP058__7638
DSCRV-232	3025	_	_	_	vOTU-14345	DP057__13655
DSCRV-233	3012	_	_	_	vOTU-70262	DP192__4431
DSCRV-234	3007	_	_	_	vOTU-22534	DP088__14736
DSCRV-235	3007	_	_	_	vOTU-4086	DP007__3193
DSCRV-236	3007	_	_	_	vOTU-83707	DP220__3165
DSCRV-237	3005	_	_	_	vOTU-28643	DP099__604
DSCRV-238	3005	_	_	_	vOTU-43991	DP155__135
DSCRV-239	3003	_	_	_	vOTU-29638	DP099__5464
DSCRV-240	2998	_	_	_	vOTU-78582	DP201__1778
DSCRV-241	2992	_	_	_	vOTU-78640	DP201__2455
DSCRV-242	2985	_	_	_	vOTU-79615	DP205__2002
DSCRV-243	2982	_	_	_	vOTU-78383	DP200__3529
DSCRV-244	2980	_	_	_	vOTU-13106	DP057__8972
DSCRV-245	2968	_	_	_	vOTU-9763	DP010__5502
DSCRV-246	2944	_	_	_	vOTU-28270	DP098__6515
DSCRV-247	2944	_	_	_	vOTU-54788	DP183__67
DSCRV-248	2944	_	_	_	vOTU-65201	DP189__35960
DSCRV-249	2939	_	_	_	vOTU-6848	DP007__14037
DSCRV-250	2937	Potyviridae	Telfairia mosaic virus	plant	vOTU-54758	DP182__1796
DSCRV-251	2934	_	_	_	vOTU-42247	DP149__1777
DSCRV-252	2933	_	_	_	vOTU-73524	DP193__15330
DSCRV-253	2927	_	_	_	vOTU-80643	DP209__1664
DSCRV-254	2923	_	_	_	vOTU-3055	DP006__8811
DSCRV-255	2921	_	_	_	vOTU-73544	DP193__15453
DSCRV-256	2921	_	_	_	vOTU-75081	DP193__22848
DSCRV-257	2857	_	_	_	vOTU-6648	DP007__13211
DSCRV-258	2849	_	_	_	vOTU-75654	DP193__25567
DSCRV-259	2842	_	_	_	vOTU-59679	DP189__15128
DSCRV-260	2832	_	_	_	vOTU-22457	DP088__14382
DSCRV-261	2827	_	_	_	vOTU-25162	DP091__1584
DSCRV-262	2818	_	_	_	vOTU-34829	DP125__8696
DSCRV-263	2814	_	_	_	vOTU-73140	DP193__13657
DSCRV-264	2812	_	_	_	vOTU-40633	DP129__18451
DSCRV-265	2810	_	_	_	vOTU-18245	DP081__3398
DSCRV-266	2810	_	_	_	vOTU-30637	DP117__3194
DSCRV-267	2796	_	_	_	vOTU-29210	DP099__3322
DSCRV-268	2793	_	_	_	vOTU-29170	DP099__3158
DSCRV-269	2786	_	_	_	vOTU-68585	DP189__48623
DSCRV-270	2776	_	_	_	vOTU-49523	DP162__117
DSCRV-271	2772	_	_	_	vOTU-44216	DP157__180
DSCRV-272	2760	_	_	_	vOTU-80834	DP209__4867
DSCRV-273	2754	_	_	_	vOTU-48487	DP160__2452
DSCRV-274	2752	_	_	_	vOTU-74406	DP193__19637
DSCRV-275	2747	_	_	_	vOTU-80494	DP208__404
DSCRV-276	2734	_	_	_	vOTU-1745	DP005__1609
DSCRV-277	2732	_	_	_	vOTU-22053	DP088__12608
DSCRV-278	2726	_	_	_	vOTU-73639	DP193__15818
DSCRV-279	2720	_	_	_	vOTU-28195	DP098__6138
DSCRV-280	2716	_	_	_	vOTU-34087	DP125__5766
DSCRV-281	2713	_	_	_	vOTU-29616	DP099__5312
DSCRV-282	2708	_	_	_	vOTU-76681	DP197__1923
DSCRV-283	2707	_	_	_	vOTU-28374	DP098__7005
DSCRV-284	2706	_	_	_	vOTU-41690	DP147__1002
DSCRV-285	2693	_	_	_	vOTU-272	DP003__1722
DSCRV-286	2685	_	_	_	vOTU-20714	DP088__6567
DSCRV-287	2682	_	_	_	vOTU-72522	DP193__10572
DSCRV-288	2663	_	_	_	vOTU-30765	DP117__3998
DSCRV-289	2654	_	_	_	vOTU-14368	DP057__13747
DSCRV-290	2649	_	_	_	vOTU-38447	DP129__9221
DSCRV-291	2645	_	_	_	vOTU-16162	DP058__703
DSCRV-292	2641	_	_	_	vOTU-69125	DP190__1188
DSCRV-293	2633	_	_	_	vOTU-12678	DP057__7326
DSCRV-294	2628	_	_	_	vOTU-17836	DP081__315
DSCRV-295	2628	_	_	_	vOTU-24686	DP088__24270
DSCRV-296	2624	_	_	_	vOTU-66099	DP189__39364
DSCRV-297	2620	_	_	_	vOTU-11918	DP057__4536
DSCRV-298	2612	_	_	_	vOTU-37188	DP129__4045
DSCRV-299	2601	_	_	_	vOTU-71217	DP193__4298
DSCRV-300	2600	_	_	_	vOTU-50388	DP163__2473
DSCRV-301	2595	_	_	_	vOTU-5584	DP007__9072
DSCRV-302	2581	_	_	_	vOTU-15335	DP057__17317
DSCRV-303	2581	_	_	_	vOTU-34592	DP125__7698
DSCRV-304	2578	_	_	_	vOTU-72994	DP193__12929
DSCRV-305	2573	_	_	_	vOTU-29489	DP099__4683
DSCRV-306	2567	_	_	_	vOTU-3665	DP007__1581
DSCRV-307	2560	_	_	_	vOTU-65077	DP189__35503
DSCRV-308	2557	_	_	_	vOTU-77567	DP198__4707
DSCRV-309	2550	Retroviridae	Human endogenous retrovirus K	vertebrate	vOTU-3335	DP007__362
DSCRV-310	2531	_	_	_	vOTU-74134	DP193__18285
DSCRV-311	2521	_	_	_	vOTU-55500	DP187__1763
DSCRV-312	2508	_	_	_	vOTU-71513	DP193__5632
DSCRV-313	2505	_	_	_	vOTU-55847	DP189__1075
DSCRV-314	2491	_	_	_	vOTU-77141	DP197__4932
DSCRV-315	2484	_	_	_	vOTU-32574	DP124__1009
DSCRV-316	2480	_	_	_	vOTU-22230	DP088__13420
DSCRV-317	2478	_	_	_	vOTU-16334	DP058__1642
DSCRV-318	2478	_	_	_	vOTU-38105	DP129__7702
DSCRV-319	2475	_	_	_	vOTU-15481	DP057__17891
DSCRV-320	2470	_	_	_	vOTU-15608	DP057__18405
DSCRV-321	2468	_	_	_	vOTU-47065	DP158__24017
DSCRV-322	2466	_	_	_	vOTU-55153	DP186__1800
DSCRV-323	2458	_	_	_	vOTU-1653	DP005__1031
DSCRV-324	2455	_	_	_	vOTU-19376	DP088__717
DSCRV-325	2450	_	_	_	vOTU-30297	DP117__851
DSCRV-326	2449	_	_	_	vOTU-51664	DP163__8462
DSCRV-327	2449	_	_	_	vOTU-60555	DP189__18333
DSCRV-328	2443	_	_	_	vOTU-51377	DP163__7082
DSCRV-329	2439	_	_	_	vOTU-9281	DP010__3192
DSCRV-330	2437	_	_	_	vOTU-4883	DP007__6313
DSCRV-331	2437	_	_	_	vOTU-61087	DP189__20378
DSCRV-332	2416	_	_	_	vOTU-47640	DP158__28893
DSCRV-333	2416	_	_	_	vOTU-49254	DP161__1039
DSCRV-334	2416	_	_	_	vOTU-60365	DP189__17695
DSCRV-335	2412	_	_	_	vOTU-41011	DP132__425
DSCRV-336	2412	_	_	_	vOTU-81378	DP210__2707
DSCRV-337	2409	_	_	_	vOTU-51271	DP163__6595
DSCRV-338	2403	_	_	_	vOTU-1243	DP004__651
DSCRV-339	2399	_	_	_	vOTU-65723	DP189__37886
DSCRV-340	2396	Picornaviridae	Enterovirus A	vertebrate	vOTU-1727	DP005__1476
DSCRV-341	2395	_	_	_	vOTU-37473	DP129__5142
DSCRV-342	2391	_	_	_	vOTU-76196	DP194__396
DSCRV-343	2386	_	_	_	vOTU-16721	DP058__3984
DSCRV-344	2384	_	_	_	vOTU-45763	DP158__12805
DSCRV-345	2382	_	_	_	vOTU-19693	DP088__2240
DSCRV-346	2380	_	_	_	vOTU-69250	DP191__593
DSCRV-347	2367	_	_	_	vOTU-6518	DP007__12665
DSCRV-348	2365	_	_	_	vOTU-29772	DP099__6187
DSCRV-349	2363	_	_	_	vOTU-76855	DP197__3015
DSCRV-350	2351	_	_	_	vOTU-16042	DP057__20053
DSCRV-351	2348	_	_	_	vOTU-13942	DP057__12067
DSCRV-352	2348	_	_	_	vOTU-15431	DP057__17681
DSCRV-353	2345	_	_	_	vOTU-25786	DP095__2544
DSCRV-354	2344	_	_	_	vOTU-18934	DP081__8860
DSCRV-355	2344	_	_	_	vOTU-44288	DP157__1625
DSCRV-356	2335	_	_	_	vOTU-12350	DP057__6094
DSCRV-357	2335	_	_	_	vOTU-45267	DP158__8633
DSCRV-358	2334	_	_	_	vOTU-52775	DP166__1609
DSCRV-359	2333	_	_	_	vOTU-31370	DP119__413
DSCRV-360	2333	_	_	_	vOTU-31411	DP120__199
DSCRV-361	2333	_	_	_	vOTU-83142	DP218__1503
DSCRV-362	2327	_	_	_	vOTU-10049	DP040__1043
DSCRV-363	2327	_	_	_	vOTU-10085	DP042__447
DSCRV-364	2327	_	_	_	vOTU-10333	DP049__1054
DSCRV-365	2327	_	_	_	vOTU-10634	DP055__1793
DSCRV-366	2327	_	_	_	vOTU-1578	DP005__553
DSCRV-367	2327	_	_	_	vOTU-17419	DP060__1313
DSCRV-368	2327	_	_	_	vOTU-18434	DP081__4867
DSCRV-369	2327	_	_	_	vOTU-19142	DP082__8658
DSCRV-370	2327	_	_	_	vOTU-19711	DP088__2323
DSCRV-371	2327	_	_	_	vOTU-25015	DP089__624
DSCRV-372	2327	_	_	_	vOTU-246	DP003__1525
DSCRV-373	2327	_	_	_	vOTU-30136	DP100__1228
DSCRV-374	2327	_	_	_	vOTU-41655	DP146__626
DSCRV-375	2327	_	_	_	vOTU-42478	DP149__3204
DSCRV-376	2327	_	_	_	vOTU-44188	DP156__666
DSCRV-377	2327	_	_	_	vOTU-49471	DP161__5072
DSCRV-378	2327	_	_	_	vOTU-52509	DP165__5947
DSCRV-379	2327	_	_	_	vOTU-53512	DP167__944
DSCRV-380	2327	_	_	_	vOTU-53538	DP168__435
DSCRV-381	2327	_	_	_	vOTU-53582	DP170__61
DSCRV-382	2327	_	_	_	vOTU-53819	DP172__617
DSCRV-383	2327	_	_	_	vOTU-54504	DP179__619
DSCRV-384	2327	_	_	_	vOTU-54560	DP180__1177
DSCRV-385	2327	_	_	_	vOTU-54800	DP183__309
DSCRV-386	2327	_	_	_	vOTU-54914	DP185__97
DSCRV-387	2327	_	_	_	vOTU-55121	DP186__1552
DSCRV-388	2327	_	_	_	vOTU-55486	DP187__1526
DSCRV-389	2327	_	_	_	vOTU-76137	DP193__28006
DSCRV-390	2327	_	_	_	vOTU-76304	DP195__1180
DSCRV-391	2327	_	_	_	vOTU-79147	DP204__455
DSCRV-392	2327	_	_	_	vOTU-80450	DP207__748
DSCRV-393	2327	_	_	_	vOTU-82925	DP217__3787
DSCRV-394	2327	_	_	_	vOTU-84868	DP226__943
DSCRV-395	2327	_	_	_	vOTU-8671	DP010__50
DSCRV-396	2326	_	_	_	vOTU-29983	DP099__7294
DSCRV-397	2326	_	_	_	vOTU-31319	DP118__3311
DSCRV-398	2326	_	_	_	vOTU-41529	DP141__839
DSCRV-399	2326	_	_	_	vOTU-43782	DP151__1625
DSCRV-400	2326	_	_	_	vOTU-53752	DP171__3788
DSCRV-401	2326	_	_	_	vOTU-54435	DP177__1477
DSCRV-402	2326	_	_	_	vOTU-76374	DP196__1824
DSCRV-403	2326	_	_	_	vOTU-77787	DP198__6776
DSCRV-404	2326	_	_	_	vOTU-82809	DP215__3596
DSCRV-405	2326	_	_	_	vOTU-83593	DP220__1406
DSCRV-406	2325	_	_	_	vOTU-79418	DP205__1059
DSCRV-407	2324	_	_	_	vOTU-17436	DP060__2273
DSCRV-408	2324	_	_	_	vOTU-19124	DP082__7808
DSCRV-409	2324	_	_	_	vOTU-26746	DP095__14842
DSCRV-410	2324	_	_	_	vOTU-35694	DP128__1164
DSCRV-411	2324	_	_	_	vOTU-44221	DP157__277
DSCRV-412	2324	_	_	_	vOTU-49462	DP161__4823
DSCRV-413	2324	_	_	_	vOTU-59168	DP189__13190
DSCRV-414	2324	_	_	_	vOTU-82557	DP212__4115
DSCRV-415	2324	_	_	_	vOTU-82778	DP215__1102
DSCRV-416	2321	_	_	_	vOTU-41531	DP142__121
DSCRV-417	2320	_	_	_	vOTU-8054	DP008__2123
DSCRV-418	2318	_	_	_	vOTU-9897	DP031__713
DSCRV-419	2318	_	_	_	vOTU-10024	DP040__72
DSCRV-420	2318	_	_	_	vOTU-10108	DP042__1421
DSCRV-421	2318	_	_	_	vOTU-10310	DP049__318
DSCRV-422	2318	_	_	_	vOTU-1541	DP005__152
DSCRV-423	2318	_	_	_	vOTU-31329	DP118__4062
DSCRV-424	2318	_	_	_	vOTU-41557	DP142__1057
DSCRV-425	2318	_	_	_	vOTU-41634	DP145__508
DSCRV-426	2318	_	_	_	vOTU-43768	DP151__1162
DSCRV-427	2318	_	_	_	vOTU-52551	DP165__7147
DSCRV-428	2318	_	_	_	vOTU-53552	DP168__632
DSCRV-429	2318	_	_	_	vOTU-54024	DP175__1535
DSCRV-430	2318	_	_	_	vOTU-54505	DP179__745
DSCRV-431	2318	_	_	_	vOTU-54737	DP182__1573
DSCRV-432	2318	_	_	_	vOTU-54971	DP185__3744
DSCRV-433	2318	_	_	_	vOTU-55528	DP188__996
DSCRV-434	2318	_	_	_	vOTU-71670	DP193__6449
DSCRV-435	2318	_	_	_	vOTU-76704	DP197__2030
DSCRV-436	2318	_	_	_	vOTU-77915	DP199__646
DSCRV-437	2318	_	_	_	vOTU-78984	DP203__999
DSCRV-438	2318	_	_	_	vOTU-79680	DP205__2354
DSCRV-439	2318	_	_	_	vOTU-80448	DP207__714
DSCRV-440	2318	_	_	_	vOTU-80490	DP208__96
DSCRV-441	2318	_	_	_	vOTU-80954	DP209__6538
DSCRV-442	2318	_	_	_	vOTU-81612	DP210__5839
DSCRV-443	2312	_	_	_	vOTU-21387	DP088__9561
DSCRV-444	2312	_	_	_	vOTU-41609	DP144__336
DSCRV-445	2312	_	_	_	vOTU-53499	DP167__324
DSCRV-446	2312	_	_	_	vOTU-55205	DP186__2379
DSCRV-447	2312	_	_	_	vOTU-76290	DP195__761
DSCRV-448	2312	_	_	_	vOTU-79182	DP204__1291
DSCRV-449	2312	_	_	_	vOTU-84700	DP224__2855
DSCRV-450	2307	_	_	_	vOTU-18304	DP081__3818
DSCRV-451	2304	_	_	_	vOTU-41770	DP148__724
DSCRV-452	2298	_	_	_	vOTU-74535	DP193__20280
DSCRV-453	2294	_	_	_	vOTU-10098	DP042__1036
DSCRV-454	2294	_	_	_	vOTU-12709	DP057__7416
DSCRV-455	2294	_	_	_	vOTU-31339	DP118__4567
DSCRV-456	2294	_	_	_	vOTU-38790	DP129__10670
DSCRV-457	2294	_	_	_	vOTU-54969	DP185__3565
DSCRV-458	2294	_	_	_	vOTU-82881	DP217__340
DSCRV-459	2290	_	_	_	vOTU-10019	DP040__33
DSCRV-460	2290	_	_	_	vOTU-10159	DP047__217
DSCRV-461	2290	_	_	_	vOTU-27835	DP098__4195
DSCRV-462	2290	_	_	_	vOTU-43865	DP153__1177
DSCRV-463	2290	_	_	_	vOTU-53525	DP168__204
DSCRV-464	2290	_	_	_	vOTU-55277	DP186__3168
DSCRV-465	2290	_	_	_	vOTU-60210	DP189__17134
DSCRV-466	2290	_	_	_	vOTU-66937	DP189__42390
DSCRV-467	2290	_	_	_	vOTU-69149	DP190__1689
DSCRV-468	2290	_	_	_	vOTU-76204	DP194__664
DSCRV-469	2290	_	_	_	vOTU-76950	DP197__3604
DSCRV-470	2290	_	_	_	vOTU-78991	DP203__1061
DSCRV-471	2290	_	_	_	vOTU-82689	DP213__2338
DSCRV-472	2290	_	_	_	vOTU-82742	DP214__824
DSCRV-473	2290	_	_	_	vOTU-82863	DP216__1599
DSCRV-474	2290	_	_	_	vOTU-83012	DP218__600
DSCRV-475	2290	_	_	_	vOTU-84166	DP222__1786
DSCRV-476	2290	_	_	_	vOTU-84741	DP224__3139
DSCRV-477	2288	_	_	_	vOTU-7252	DP007__15511
DSCRV-478	2288	_	_	_	vOTU-83723	DP220__3376
DSCRV-479	2281	_	_	_	vOTU-31765	DP120__1959
DSCRV-480	2281	_	_	_	vOTU-69141	DP190__1505
DSCRV-481	2281	_	_	_	vOTU-83222	DP218__2043
DSCRV-482	2280	_	_	_	vOTU-31976	DP120__3019
DSCRV-483	2280	_	_	_	vOTU-83638	DP220__2141
DSCRV-484	2279	_	_	_	vOTU-54411	DP177__592
DSCRV-485	2276	_	_	_	vOTU-10578	DP053__376
DSCRV-486	2276	_	_	_	vOTU-52624	DP166__68
DSCRV-487	2276	_	_	_	vOTU-54727	DP182__1413
DSCRV-488	2276	_	_	_	vOTU-59104	DP189__12931
DSCRV-489	2276	_	_	_	vOTU-78730	DP202__694
DSCRV-490	2275	_	_	_	vOTU-1393	DP004__3169
DSCRV-491	2275	_	_	_	vOTU-1790	DP005__1974
DSCRV-492	2275	_	_	_	vOTU-43802	DP152__645
DSCRV-493	2275	_	_	_	vOTU-43859	DP153__985
DSCRV-494	2275	_	_	_	vOTU-43930	DP154__1092
DSCRV-495	2275	_	_	_	vOTU-54366	DP176__2616
DSCRV-496	2275	_	_	_	vOTU-54485	DP178__1350
DSCRV-497	2275	_	_	_	vOTU-54759	DP182__1864
DSCRV-498	2275	_	_	_	vOTU-55027	DP186__622
DSCRV-499	2275	_	_	_	vOTU-76644	DP197__1701
DSCRV-500	2275	_	_	_	vOTU-79765	DP205__2788
DSCRV-501	2275	_	_	_	vOTU-80416	DP207__138
DSCRV-502	2275	_	_	_	vOTU-82729	DP214__386
DSCRV-503	2275	_	_	_	vOTU-83566	DP220__994
DSCRV-504	2275	_	_	_	vOTU-8657	DP009__7902
DSCRV-505	2275	_	_	_	vOTU-9632	DP010__4914
DSCRV-506	2274	_	_	_	vOTU-80404	DP206__1716
DSCRV-507	2273	_	_	_	vOTU-37713	DP129__6063
DSCRV-508	2272	_	_	_	vOTU-9940	DP031__1527
DSCRV-509	2272	_	_	_	vOTU-1639	DP005__932
DSCRV-510	2272	_	_	_	vOTU-19162	DP086__336
DSCRV-511	2272	_	_	_	vOTU-23603	DP088__19136
DSCRV-512	2272	_	_	_	vOTU-31354	DP119__132
DSCRV-513	2272	_	_	_	vOTU-46255	DP158__17081
DSCRV-514	2272	_	_	_	vOTU-9854	DP026__1660
DSCRV-515	2271	_	_	_	vOTU-21694	DP088__11050
DSCRV-516	2270	_	_	_	vOTU-4747	DP007__5865
DSCRV-517	2269	_	_	_	vOTU-59091	DP189__12857
DSCRV-518	2257	_	_	_	vOTU-57257	DP189__6072
DSCRV-519	2254	_	_	_	vOTU-64536	DP189__33471
DSCRV-520	2252	_	_	_	vOTU-77746	DP198__6446
DSCRV-521	2251	_	_	_	vOTU-83476	DP219__854
DSCRV-522	2250	_	_	_	vOTU-10141	DP046__1272
DSCRV-523	2250	_	_	_	vOTU-18285	DP081__3717
DSCRV-524	2250	_	_	_	vOTU-77819	DP198__7165
DSCRV-525	2250	_	_	_	vOTU-79360	DP205__770
DSCRV-526	2250	_	_	_	vOTU-9828	DP026__552
DSCRV-527	2248	_	_	_	vOTU-22314	DP088__13763
DSCRV-528	2245	_	_	_	vOTU-13227	DP057__9424
DSCRV-529	2242	_	_	_	vOTU-13182	DP057__9260
DSCRV-530	2242	_	_	_	vOTU-6127	DP007__11141
DSCRV-531	2237	_	_	_	vOTU-35849	DP128__2405
DSCRV-532	2236	_	_	_	vOTU-76930	DP197__3500
DSCRV-533	2235	_	_	_	vOTU-72169	DP193__8781
DSCRV-534	2233	_	_	_	vOTU-36108	DP128__4525
DSCRV-535	2233	_	_	_	vOTU-46957	DP158__23154
DSCRV-536	2233	_	_	_	vOTU-49591	DP162__519
DSCRV-537	2232	_	_	_	vOTU-29293	DP099__3750
DSCRV-538	2228	_	_	_	vOTU-40380	DP129__17465
DSCRV-539	2228	_	_	_	vOTU-5756	DP007__9657
DSCRV-540	2226	_	_	_	vOTU-12183	DP057__5509
DSCRV-541	2224	_	_	_	vOTU-30479	DP117__2075
DSCRV-542	2221	_	_	_	vOTU-46988	DP158__23416
DSCRV-543	2216	_	_	_	vOTU-43257	DP149__8018
DSCRV-544	2211	_	_	_	vOTU-49679	DP162__1121
DSCRV-545	2200	_	_	_	vOTU-52420	DP165__3488
DSCRV-546	2198	_	_	_	vOTU-29446	DP099__4480
DSCRV-547	2193	_	_	_	vOTU-54880	DP184__1437
DSCRV-548	2191	_	_	_	vOTU-53140	DP166__4742
DSCRV-549	2188	_	_	_	vOTU-81276	DP210__1258
DSCRV-550	2187	_	_	_	vOTU-2452	DP006__4436
DSCRV-551	2183	_	_	_	vOTU-10570	DP053__232
DSCRV-552	2176	_	_	_	vOTU-4977	DP007__6674
DSCRV-553	2170	_	_	_	vOTU-1053	DP003__7456
DSCRV-554	2170	_	_	_	vOTU-41874	DP148__1732
DSCRV-555	2169	_	_	_	vOTU-8000	DP008__1451
DSCRV-556	2161	_	_	_	vOTU-15220	DP057__16905
DSCRV-557	2160	_	_	_	vOTU-9394	DP010__3802
DSCRV-558	2159	_	_	_	vOTU-81274	DP210__1235
DSCRV-559	2156	_	_	_	vOTU-52861	DP166__2282
DSCRV-560	2154	_	_	_	vOTU-71031	DP193__3449
DSCRV-561	2151	_	_	_	vOTU-83887	DP221__2057
DSCRV-562	2150	_	_	_	vOTU-80120	DP205__4508
DSCRV-563	2149	_	_	_	vOTU-42628	DP149__4064
DSCRV-564	2146	_	_	_	vOTU-69651	DP191__3942
DSCRV-565	2133	_	_	_	vOTU-74808	DP193__21486
DSCRV-566	2131	_	_	_	vOTU-30502	DP117__2243
DSCRV-567	2124	_	_	_	vOTU-62738	DP189__26624
DSCRV-568	2122	_	_	_	vOTU-22210	DP088__13314
DSCRV-569	2119	_	_	_	vOTU-54829	DP184__276
DSCRV-570	2117	_	_	_	vOTU-16083	DP058__272
DSCRV-571	2114	_	_	_	vOTU-21419	DP088__9750
DSCRV-572	2111	_	_	_	vOTU-63509	DP189__29551
DSCRV-573	2109	_	_	_	vOTU-64049	DP189__31691
DSCRV-574	2108	_	_	_	vOTU-43683	DP149__10628
DSCRV-575	2107	_	_	_	vOTU-9321	DP010__3396
DSCRV-576	2106	_	_	_	vOTU-73921	DP193__17203
DSCRV-577	2102	_	_	_	vOTU-30706	DP117__3685
DSCRV-578	2095	_	_	_	vOTU-48477	DP160__2332
DSCRV-579	2086	_	_	_	vOTU-46460	DP158__18837
DSCRV-580	2084	_	_	_	vOTU-1211	DP003__8630
DSCRV-581	2084	_	_	_	vOTU-18123	DP081__2531
DSCRV-582	2083	_	_	_	vOTU-42479	DP149__3222
DSCRV-583	2079	_	_	_	vOTU-33182	DP125__1997
DSCRV-584	2077	_	_	_	vOTU-42606	DP149__3908
DSCRV-585	2072	_	_	_	vOTU-45570	DP158__11279
DSCRV-586	2072	_	_	_	vOTU-78413	DP201__54
DSCRV-587	2068	_	_	_	vOTU-72206	DP193__8953
DSCRV-588	2066	_	_	_	vOTU-25235	DP091__2347
DSCRV-589	2062	_	_	_	vOTU-77033	DP197__4128
DSCRV-590	2060	_	_	_	vOTU-42324	DP149__2206
DSCRV-591	2060	_	_	_	vOTU-15070	DP057__16324
DSCRV-592	2059	_	_	_	vOTU-73797	DP193__16584
DSCRV-593	2049	_	_	_	vOTU-48688	DP160__5298
DSCRV-594	2048	_	_	_	vOTU-30964	DP117__5500
DSCRV-595	2048	_	_	_	vOTU-51985	DP164__1096
DSCRV-596	2047	_	_	_	vOTU-45259	DP158__8492
DSCRV-597	2043	_	_	_	vOTU-76343	DP196__669
DSCRV-598	2042	_	_	_	vOTU-53906	DP173__1102
DSCRV-599	2040	_	_	_	vOTU-8851	DP010__1019
DSCRV-600	2032	_	_	_	vOTU-74091	DP193__17991
DSCRV-601	2015	_	_	_	vOTU-28811	DP099__1416
DSCRV-602	2008	_	_	_	vOTU-17655	DP078__3048
DSCRV-603	2008	_	_	_	vOTU-25076	DP091__532
DSCRV-604	2008	_	_	_	vOTU-30859	DP117__4745
DSCRV-605	2007	_	_	_	vOTU-5415	DP007__8405
DSCRV-606	2006	_	_	_	vOTU-25210	DP091__2059
DSCRV-607	1999	_	_	_	vOTU-44453	DP158__1099
DSCRV-608	1993	_	_	_	vOTU-52113	DP164__1806
DSCRV-609	1992	_	_	_	vOTU-18091	DP081__2273
DSCRV-610	1992	_	_	_	vOTU-199	DP003__1194
DSCRV-611	1991	_	_	_	vOTU-29168	DP099__3148
DSCRV-612	1990	_	_	_	vOTU-31998	DP120__3154
DSCRV-613	1990	_	_	_	vOTU-36620	DP129__1777
DSCRV-614	1988	_	_	_	vOTU-81449	DP210__3777
DSCRV-615	1987	_	_	_	vOTU-45219	DP158__8122
DSCRV-616	1987	_	_	_	vOTU-45660	DP158__11984
DSCRV-617	1985	_	_	_	vOTU-42921	DP149__5862
DSCRV-618	1984	_	_	_	vOTU-1448	DP004__4192
DSCRV-619	1984	_	_	_	vOTU-6938	DP007__14360
DSCRV-620	1984	_	_	_	vOTU-8514	DP009__4792
DSCRV-621	1984	_	_	_	vOTU-876	DP003__5994
DSCRV-622	1976	_	_	_	vOTU-74935	DP193__22128
DSCRV-623	1975	_	_	_	vOTU-80527	DP209__30
DSCRV-624	1972	_	_	_	vOTU-35576	DP128__58
DSCRV-625	1972	_	_	_	vOTU-79718	DP205__2578
DSCRV-626	1970	_	_	_	vOTU-44239	DP157__729
DSCRV-627	1969	_	_	_	vOTU-70367	DP193__231
DSCRV-628	1968	_	_	_	vOTU-53650	DP171__1032
DSCRV-629	1967	_	_	_	vOTU-74187	DP193__18507
DSCRV-630	1966	_	_	_	vOTU-891	DP003__6107
DSCRV-631	1965	_	_	_	vOTU-20155	DP088__4270
DSCRV-632	1964	_	_	_	vOTU-57971	DP189__8701
DSCRV-633	1962	_	_	_	vOTU-1501	DP004__5354
DSCRV-634	1962	_	_	_	vOTU-40037	DP129__16025
DSCRV-635	1956	_	_	_	vOTU-29966	DP099__7213
DSCRV-636	1954	_	_	_	vOTU-2062	DP006__1929
DSCRV-637	1947	_	_	_	vOTU-22399	DP088__14132
DSCRV-638	1947	_	_	_	vOTU-44522	DP158__1589
DSCRV-639	1946	_	_	_	vOTU-75117	DP193__22991
DSCRV-640	1944	_	_	_	vOTU-31755	DP120__1897
DSCRV-641	1940	_	_	_	vOTU-1762	DP005__1754
DSCRV-642	1938	_	_	_	vOTU-25926	DP095__4238
DSCRV-643	1927	_	_	_	vOTU-2312	DP006__3441
DSCRV-644	1924	_	_	_	vOTU-41468	DP132__3248
DSCRV-645	1924	_	_	_	vOTU-74587	DP193__20533
DSCRV-646	1923	_	_	_	vOTU-1516	DP004__5653
DSCRV-647	1923	_	_	_	vOTU-21420	DP088__9755
DSCRV-648	1922	_	_	_	vOTU-10717	DP057__120
DSCRV-649	1921	_	_	_	vOTU-66115	DP189__39418
DSCRV-650	1918	_	_	_	vOTU-74199	DP193__18555
DSCRV-651	1910	_	_	_	vOTU-70489	DP193__840
DSCRV-652	1904	_	_	_	vOTU-43453	DP149__9096
DSCRV-653	1901	_	_	_	vOTU-21259	DP088__8986
DSCRV-654	1901	_	_	_	vOTU-53763	DP171__4016
DSCRV-655	1895	_	_	_	vOTU-41682	DP147__639
DSCRV-656	1890	_	_	_	vOTU-776	DP003__5327
DSCRV-657	1889	_	_	_	vOTU-26673	DP095__13827
DSCRV-658	1889	_	_	_	vOTU-47036	DP158__23832
DSCRV-659	1887	_	_	_	vOTU-45491	DP158__10510
DSCRV-660	1885	_	_	_	vOTU-75417	DP193__24435
DSCRV-661	1884	_	_	_	vOTU-78533	DP201__1251
DSCRV-662	1882	_	_	_	vOTU-8691	DP010__171
DSCRV-663	1881	_	_	_	vOTU-25431	DP091__4738
DSCRV-664	1877	_	_	_	vOTU-43631	DP149__10290
DSCRV-665	1876	_	_	_	vOTU-33431	DP125__3017
DSCRV-666	1875	_	_	_	vOTU-21495	DP088__10056
DSCRV-667	1874	_	_	_	vOTU-609	DP003__4048
DSCRV-668	1872	_	_	_	vOTU-19751	DP088__2476
DSCRV-669	1871	_	_	_	vOTU-36481	DP129__1220
DSCRV-670	1866	_	_	_	vOTU-77182	DP198__322
DSCRV-671	1861	_	_	_	vOTU-44366	DP158__378
DSCRV-672	1860	_	_	_	vOTU-32057	DP120__3465
DSCRV-673	1856	_	_	_	vOTU-71646	DP193__6303
DSCRV-674	1856	_	_	_	vOTU-72964	DP193__12796
DSCRV-675	1852	_	_	_	vOTU-41000	DP132__330
DSCRV-676	1850	_	_	_	vOTU-2465	DP006__4514
DSCRV-677	1848	_	_	_	vOTU-9470	DP010__4150
DSCRV-678	1847	_	_	_	vOTU-9231	DP010__2934
DSCRV-679	1845	_	_	_	vOTU-42864	DP149__5527
DSCRV-680	1845	_	_	_	vOTU-71540	DP193__5725
DSCRV-681	1844	_	_	_	vOTU-75056	DP193__22737
DSCRV-682	1842	_	_	_	vOTU-20967	DP088__7784
DSCRV-683	1837	_	_	_	vOTU-24091	DP088__21351
DSCRV-684	1836	_	_	_	vOTU-20908	DP088__7548
DSCRV-685	1835	_	_	_	vOTU-42544	DP149__3556
DSCRV-686	1830	_	_	_	vOTU-2848	DP006__7320
DSCRV-687	1828	_	_	_	vOTU-2598	DP006__5481
DSCRV-688	1828	_	_	_	vOTU-70573	DP193__1298
DSCRV-689	1827	_	_	_	vOTU-41128	DP132__1141
DSCRV-690	1824	_	_	_	vOTU-21749	DP088__11288
DSCRV-691	1824	_	_	_	vOTU-4390	DP007__4502
DSCRV-692	1823	_	_	_	vOTU-19120	DP082__7607
DSCRV-693	1823	_	_	_	vOTU-69731	DP191__4624
DSCRV-694	1823	_	_	_	vOTU-74975	DP193__22317
DSCRV-695	1822	_	_	_	vOTU-43513	DP149__9401
DSCRV-696	1818	_	_	_	vOTU-22711	DP088__15452
DSCRV-697	1817	_	_	_	vOTU-21154	DP088__8530
DSCRV-698	1816	_	_	_	vOTU-44907	DP158__5209
DSCRV-699	1815	_	_	_	vOTU-35684	DP128__1084
DSCRV-700	1812	_	_	_	vOTU-81616	DP210__5928
DSCRV-701	1806	_	_	_	vOTU-84678	DP224__2695
DSCRV-702	1804	_	_	_	vOTU-24300	DP088__22383
DSCRV-703	1800	_	_	_	vOTU-59802	DP189__15664
DSCRV-704	1797	_	_	_	vOTU-15696	DP057__18744
DSCRV-705	1794	_	_	_	vOTU-82254	DP212__2140
DSCRV-706	1793	_	_	_	vOTU-79580	DP205__1849
DSCRV-707	1791	_	_	_	vOTU-41016	DP132__458
DSCRV-708	1789	_	_	_	vOTU-28646	DP099__624
DSCRV-709	1789	_	_	_	vOTU-74070	DP193__17906
DSCRV-710	1785	_	_	_	vOTU-21418	DP088__9748
DSCRV-711	1782	_	_	_	vOTU-75699	DP193__25810
DSCRV-712	1781	_	_	_	vOTU-35990	DP128__3539
DSCRV-713	1781	_	_	_	vOTU-38217	DP129__8188
DSCRV-714	1776	_	_	_	vOTU-24893	DP088__25299
DSCRV-715	1772	_	_	_	vOTU-64937	DP189__35042
DSCRV-716	1769	_	_	_	vOTU-5690	DP007__9449
DSCRV-717	1768	_	_	_	vOTU-21925	DP088__12020
DSCRV-718	1768	_	_	_	vOTU-23155	DP088__17288
DSCRV-719	1764	_	_	_	vOTU-18798	DP081__7739
DSCRV-720	1764	_	_	_	vOTU-9581	DP010__4703
DSCRV-721	1763	_	_	_	vOTU-70696	DP193__1937
DSCRV-722	1762	_	_	_	vOTU-9693	DP010__5198
DSCRV-723	1753	_	_	_	vOTU-62165	DP189__24575
DSCRV-724	1752	_	_	_	vOTU-42714	DP149__4617
DSCRV-725	1750	_	_	_	vOTU-69845	DP191__5529
DSCRV-726	1749	_	_	_	vOTU-36070	DP128__4228
DSCRV-727	1748	_	_	_	vOTU-42243	DP149__1748
DSCRV-728	1748	_	_	_	vOTU-82837	DP216__1012
DSCRV-729	1747	_	_	_	vOTU-80578	DP209__819
DSCRV-730	1746	_	_	_	vOTU-77347	DP198__2268
DSCRV-731	1744	_	_	_	vOTU-41194	DP132__1574
DSCRV-732	1744	_	_	_	vOTU-46528	DP158__19540
DSCRV-733	1742	_	_	_	vOTU-73866	DP193__16947
DSCRV-734	1738	_	_	_	vOTU-29564	DP099__5040
DSCRV-735	1738	_	_	_	vOTU-46143	DP158__16082
DSCRV-736	1737	_	_	_	vOTU-47748	DP158__29899
DSCRV-737	1734	_	_	_	vOTU-27944	DP098__4858
DSCRV-738	1734	_	_	_	vOTU-57113	DP189__5596
DSCRV-739	1733	_	_	_	vOTU-71846	DP193__7312
DSCRV-740	1730	_	_	_	vOTU-42709	DP149__4600
DSCRV-741	1729	_	_	_	vOTU-48112	DP158__33245
DSCRV-742	1720	_	_	_	vOTU-33882	DP125__4948
DSCRV-743	1719	_	_	_	vOTU-4740	DP007__5835
DSCRV-744	1719	_	_	_	vOTU-74439	DP193__19777
DSCRV-745	1718	_	_	_	vOTU-67335	DP189__43913
DSCRV-746	1715	_	_	_	vOTU-39195	DP129__12327
DSCRV-747	1713	_	_	_	vOTU-41628	DP145__230
DSCRV-748	1712	_	_	_	vOTU-77466	DP198__3462
DSCRV-749	1712	_	_	_	vOTU-83984	DP221__4200
DSCRV-750	1707	_	_	_	vOTU-20505	DP088__5696
DSCRV-751	1707	_	_	_	vOTU-21854	DP088__11724
DSCRV-752	1705	_	_	_	vOTU-12808	DP057__7820
DSCRV-753	1702	_	_	_	vOTU-23238	DP088__17665
DSCRV-754	1700	_	_	_	vOTU-23625	DP088__19213
DSCRV-755	1698	_	_	_	vOTU-22232	DP088__13427
DSCRV-756	1696	_	_	_	vOTU-32137	DP120__3996
DSCRV-757	1696	_	_	_	vOTU-46613	DP158__20183
DSCRV-758	1696	_	_	_	vOTU-53863	DP173__426
DSCRV-759	1695	_	_	_	vOTU-42045	DP149__564
DSCRV-760	1694	_	_	_	vOTU-73268	DP193__14231
DSCRV-761	1692	_	_	_	vOTU-23519	DP088__18773
DSCRV-762	1691	_	_	_	vOTU-17837	DP081__316
DSCRV-763	1689	_	_	_	vOTU-31004	DP117__5820
DSCRV-764	1688	_	_	_	vOTU-71596	DP193__6043
DSCRV-765	1685	_	_	_	vOTU-42905	DP149__5782
DSCRV-766	1682	_	_	_	vOTU-17473	DP078__141
DSCRV-767	1681	_	_	_	vOTU-46985	DP158__23393
DSCRV-768	1680	_	_	_	vOTU-53017	DP166__3786
DSCRV-769	1680	_	_	_	vOTU-78102	DP200__1352
DSCRV-770	1680	_	_	_	vOTU-84732	DP224__3081
DSCRV-771	1679	_	_	_	vOTU-53054	DP166__4077
DSCRV-772	1673	_	_	_	vOTU-22518	DP088__14660
DSCRV-773	1672	_	_	_	vOTU-41404	DP132__2875
DSCRV-774	1670	_	_	_	vOTU-59298	DP189__13701
DSCRV-775	1668	_	_	_	vOTU-46447	DP158__18730
DSCRV-776	1666	_	_	_	vOTU-44571	DP158__2009
DSCRV-777	1664	_	_	_	vOTU-72655	DP193__11238
DSCRV-778	1663	_	_	_	vOTU-46565	DP158__19844
DSCRV-779	1659	_	_	_	vOTU-42179	DP149__1312
DSCRV-780	1657	_	_	_	vOTU-24191	DP088__21844
DSCRV-781	1654	_	_	_	vOTU-24125	DP088__21540
DSCRV-782	1654	_	_	_	vOTU-56645	DP189__3916
DSCRV-783	1652	_	_	_	vOTU-51783	DP163__9027
DSCRV-784	1652	_	_	_	vOTU-77091	DP197__4568
DSCRV-785	1650	_	_	_	vOTU-19980	DP088__3447
DSCRV-786	1650	_	_	_	vOTU-8178	DP008__3504
DSCRV-787	1648	_	_	_	vOTU-45838	DP158__13446
DSCRV-788	1647	_	_	_	vOTU-9603	DP010__4786
DSCRV-789	1645	_	_	_	vOTU-21339	DP088__9348
DSCRV-790	1645	_	_	_	vOTU-43676	DP149__10583
DSCRV-791	1637	_	_	_	vOTU-16510	DP058__2715
DSCRV-792	1637	_	_	_	vOTU-45146	DP158__7289
DSCRV-793	1635	_	_	_	vOTU-74258	DP193__18880
DSCRV-794	1634	_	_	_	vOTU-24222	DP088__21996
DSCRV-795	1633	_	_	_	vOTU-36738	DP129__2298
DSCRV-796	1632	_	_	_	vOTU-73500	DP193__15216
DSCRV-797	1630	_	_	_	vOTU-52395	DP165__2808
DSCRV-798	1630	_	_	_	vOTU-73017	DP193__13044
DSCRV-799	1630	_	_	_	vOTU-73037	DP193__13123
DSCRV-800	1629	_	_	_	vOTU-1750	DP005__1653
DSCRV-801	1629	_	_	_	vOTU-77203	DP198__488
DSCRV-802	1627	_	_	_	vOTU-33876	DP125__4916
DSCRV-803	1627	_	_	_	vOTU-46741	DP158__21238
DSCRV-804	1627	_	_	_	vOTU-69880	DP191__5774
DSCRV-805	1619	_	_	_	vOTU-23905	DP088__20604
DSCRV-806	1619	_	_	_	vOTU-42701	DP149__4515
DSCRV-807	1619	_	_	_	vOTU-47091	DP158__24149
DSCRV-808	1617	_	_	_	vOTU-56961	DP189__5079
DSCRV-809	1613	_	_	_	vOTU-12879	DP057__8131
DSCRV-810	1612	_	_	_	vOTU-37799	DP129__6446
DSCRV-811	1612	_	_	_	vOTU-81629	DP210__6081
DSCRV-812	1608	_	_	_	vOTU-73729	DP193__16270
DSCRV-813	1602	_	_	_	vOTU-12198	DP057__5567
DSCRV-814	1602	_	_	_	vOTU-24109	DP088__21444
DSCRV-815	1599	_	_	_	vOTU-36118	DP128__4627
DSCRV-816	1596	_	_	_	vOTU-75376	DP193__24264
DSCRV-817	1595	_	_	_	vOTU-19406	DP088__843
DSCRV-818	1592	_	_	_	vOTU-29144	DP099__3024
DSCRV-819	1592	_	_	_	vOTU-5952	DP007__10426
DSCRV-820	1592	_	_	_	vOTU-59943	DP189__16168
DSCRV-821	1591	_	_	_	vOTU-74568	DP193__20432
DSCRV-822	1590	_	_	_	vOTU-21375	DP088__9518
DSCRV-823	1590	_	_	_	vOTU-54046	DP175__2572
DSCRV-824	1589	_	_	_	vOTU-43605	DP149__10162
DSCRV-825	1589	_	_	_	vOTU-47911	DP158__31458
DSCRV-826	1587	_	_	_	vOTU-46533	DP158__19584
DSCRV-827	1586	_	_	_	vOTU-31382	DP120__37
DSCRV-828	1585	_	_	_	vOTU-46736	DP158__21192
DSCRV-829	1583	_	_	_	vOTU-24874	DP088__25178
DSCRV-830	1581	_	_	_	vOTU-78222	DP200__2165
DSCRV-831	1580	_	_	_	vOTU-24260	DP088__22206
DSCRV-832	1580	_	_	_	vOTU-52692	DP166__807
DSCRV-833	1580	_	_	_	vOTU-59326	DP189__13782
DSCRV-834	1580	_	_	_	vOTU-61811	DP189__23209
DSCRV-835	1578	_	_	_	vOTU-44335	DP158__112
DSCRV-836	1576	_	_	_	vOTU-1259	DP004__893
DSCRV-837	1574	_	_	_	vOTU-29233	DP099__3437
DSCRV-838	1573	_	_	_	vOTU-32493	DP123__1199
DSCRV-839	1568	_	_	_	vOTU-32356	DP120__5073
DSCRV-840	1567	_	_	_	vOTU-21412	DP088__9724
DSCRV-841	1567	_	_	_	vOTU-71521	DP193__5660
DSCRV-842	1566	_	_	_	vOTU-37833	DP129__6586
DSCRV-843	1561	_	_	_	vOTU-42948	DP149__6054
DSCRV-844	1556	_	_	_	vOTU-28510	DP098__7750
DSCRV-845	1556	_	_	_	vOTU-81822	DP211__1255
DSCRV-846	1555	_	_	_	vOTU-22078	DP088__12745
DSCRV-847	1555	_	_	_	vOTU-34540	DP125__7536
DSCRV-848	1555	_	_	_	vOTU-43545	DP149__9587
DSCRV-849	1554	_	_	_	vOTU-32261	DP120__4567
DSCRV-850	1553	_	_	_	vOTU-22869	DP088__16092
DSCRV-851	1551	_	_	_	vOTU-84993	DP227__1507
DSCRV-852	1550	_	_	_	vOTU-43323	DP149__8384
DSCRV-853	1549	_	_	_	vOTU-41953	DP149__91
DSCRV-854	1547	_	_	_	vOTU-29852	DP099__6639
DSCRV-855	1547	_	_	_	vOTU-73874	DP193__16974
DSCRV-856	1545	_	_	_	vOTU-54638	DP181__1439
DSCRV-857	1542	_	_	_	vOTU-32064	DP120__3526
DSCRV-858	1542	_	_	_	vOTU-53683	DP171__1746
DSCRV-859	1540	_	_	_	vOTU-35593	DP128__194
DSCRV-860	1539	_	_	_	vOTU-20673	DP088__6373
DSCRV-861	1537	_	_	_	vOTU-52834	DP166__2114
DSCRV-862	1536	_	_	_	vOTU-575	DP003__3776
DSCRV-863	1535	_	_	_	vOTU-45403	DP158__9817
DSCRV-864	1535	_	_	_	vOTU-74588	DP193__20536
DSCRV-865	1533	_	_	_	vOTU-10660	DP055__2750
DSCRV-866	1533	_	_	_	vOTU-53301	DP166__6081
DSCRV-867	1533	_	_	_	vOTU-54193	DP176__1146
DSCRV-868	1533	_	_	_	vOTU-8295	DP009__486
DSCRV-869	1531	_	_	_	vOTU-35940	DP128__3159
DSCRV-870	1530	_	_	_	vOTU-46580	DP158__19945
DSCRV-871	1528	_	_	_	vOTU-11325	DP057__2317
DSCRV-872	1528	_	_	_	vOTU-21376	DP088__9522
DSCRV-873	1528	_	_	_	vOTU-43501	DP149__9314
DSCRV-874	1528	_	_	_	vOTU-74956	DP193__22199
DSCRV-875	1528	_	_	_	vOTU-81216	DP210__389
DSCRV-876	1527	_	_	_	vOTU-53805	DP171__4971
DSCRV-877	1526	_	_	_	vOTU-2294	DP006__3342
DSCRV-878	1526	_	_	_	vOTU-28608	DP099__460
DSCRV-879	1525	_	_	_	vOTU-69406	DP191__1785
DSCRV-880	1524	_	_	_	vOTU-24518	DP088__23433
DSCRV-881	1524	_	_	_	vOTU-45304	DP158__8954
DSCRV-882	1522	_	_	_	vOTU-13985	DP057__12231
DSCRV-883	1521	_	_	_	vOTU-29241	DP099__3491
DSCRV-884	1517	_	_	_	vOTU-20818	DP088__7092
DSCRV-885	1515	_	_	_	vOTU-53725	DP171__3082
DSCRV-886	1515	_	_	_	vOTU-82857	DP216__1404
DSCRV-887	1514	_	_	_	vOTU-29176	DP099__3176
DSCRV-888	1513	_	_	_	vOTU-62455	DP189__25590
DSCRV-889	1510	_	_	_	vOTU-71158	DP193__4093
DSCRV-890	1509	_	_	_	vOTU-57353	DP189__6385
DSCRV-891	1508	_	_	_	vOTU-83992	DP221__4354
DSCRV-892	1507	_	_	_	vOTU-34743	DP125__8343
DSCRV-893	1505	_	_	_	vOTU-2289	DP006__3319
DSCRV-894	1504	_	_	_	vOTU-10673	DP055__3288
DSCRV-895	1504	_	_	_	vOTU-21058	DP088__8116
DSCRV-896	1504	_	_	_	vOTU-53188	DP166__5263
DSCRV-897	1503	_	_	_	vOTU-42651	DP149__4170
DSCRV-898	1502	_	_	_	vOTU-37480	DP129__5164
DSCRV-899	1501	_	_	_	vOTU-20479	DP088__5601
DSCRV-900	1499	_	_	_	vOTU-2293	DP006__3336
DSCRV-901	1496	_	_	_	vOTU-20897	DP088__7496
DSCRV-902	1492	_	_	_	vOTU-2492	DP006__4686
DSCRV-903	1492	_	_	_	vOTU-31678	DP120__1531
DSCRV-904	1492	_	_	_	vOTU-78515	DP201__1077
DSCRV-905	1491	_	_	_	vOTU-48649	DP160__4773
DSCRV-906	1489	_	_	_	vOTU-16797	DP058__4394
DSCRV-907	1489	_	_	_	vOTU-51204	DP163__6333
DSCRV-908	1487	_	_	_	vOTU-23505	DP088__18731
DSCRV-909	1485	_	_	_	vOTU-17762	DP078__5073
DSCRV-910	1485	_	_	_	vOTU-25253	DP091__2538
DSCRV-911	1485	_	_	_	vOTU-36149	DP128__4923
DSCRV-912	1485	_	_	_	vOTU-53710	DP171__2555
DSCRV-913	1485	_	_	_	vOTU-78794	DP202__1462
DSCRV-914	1485	_	_	_	vOTU-8293	DP009__456
DSCRV-915	1481	_	_	_	vOTU-47556	DP158__28154
DSCRV-916	1479	_	_	_	vOTU-23038	DP088__16794
DSCRV-917	1477	_	_	_	vOTU-67551	DP189__44702
DSCRV-918	1475	_	_	_	vOTU-46139	DP158__16044
DSCRV-919	1473	_	_	_	vOTU-42038	DP149__512
DSCRV-920	1473	_	_	_	vOTU-46118	DP158__15812
DSCRV-921	1470	_	_	_	vOTU-18364	DP081__4291
DSCRV-922	1470	_	_	_	vOTU-45996	DP158__14802
DSCRV-923	1468	_	_	_	vOTU-75779	DP193__26259
DSCRV-924	1466	_	_	_	vOTU-20624	DP088__6191
DSCRV-925	1466	_	_	_	vOTU-24257	DP088__22200
DSCRV-926	1465	_	_	_	vOTU-49658	DP162__1001
DSCRV-927	1459	_	_	_	vOTU-24450	DP088__23086
DSCRV-928	1458	_	_	_	vOTU-2995	DP006__8389
DSCRV-929	1458	_	_	_	vOTU-77680	DP198__5833
DSCRV-930	1457	_	_	_	vOTU-8554	DP009__5915
DSCRV-931	1456	_	_	_	vOTU-12724	DP057__7462
DSCRV-932	1455	_	_	_	vOTU-19630	DP088__1921
DSCRV-933	1454	_	_	_	vOTU-75488	DP193__24781
DSCRV-934	1452	_	_	_	vOTU-11478	DP057__2895
DSCRV-935	1452	_	_	_	vOTU-71446	DP193__5348
DSCRV-936	1451	_	_	_	vOTU-71237	DP193__4381
DSCRV-937	1450	_	_	_	vOTU-19744	DP088__2454
DSCRV-938	1450	_	_	_	vOTU-44943	DP158__5499
DSCRV-939	1450	_	_	_	vOTU-75104	DP193__22933
DSCRV-940	1449	_	_	_	vOTU-54003	DP174__1409
DSCRV-941	1447	_	_	_	vOTU-13402	DP057__10073
DSCRV-942	1446	_	_	_	vOTU-23837	DP088__20295
DSCRV-943	1445	_	_	_	vOTU-23819	DP088__20200
DSCRV-944	1445	_	_	_	vOTU-64333	DP189__32674
DSCRV-945	1445	_	_	_	vOTU-82585	DP212__4272
DSCRV-946	1442	_	_	_	vOTU-47486	DP158__27571
DSCRV-947	1441	_	_	_	vOTU-1837	DP006__342
DSCRV-948	1440	_	_	_	vOTU-45348	DP158__9329
DSCRV-949	1438	_	_	_	vOTU-43575	DP149__9930
DSCRV-950	1433	_	_	_	vOTU-31375	DP120__6
DSCRV-951	1431	_	_	_	vOTU-83338	DP218__2747
DSCRV-952	1429	_	_	_	vOTU-2556	DP006__5180
DSCRV-953	1428	_	_	_	vOTU-34591	DP125__7695
DSCRV-954	1428	_	_	_	vOTU-55639	DP189__298
DSCRV-955	1427	_	_	_	vOTU-38351	DP129__8769
DSCRV-956	1426	_	_	_	vOTU-53971	DP173__2033
DSCRV-957	1425	_	_	_	vOTU-22544	DP088__14783
DSCRV-958	1424	_	_	_	vOTU-30527	DP117__2387
DSCRV-959	1421	_	_	_	vOTU-11896	DP057__4453
DSCRV-960	1421	_	_	_	vOTU-21716	DP088__11152
DSCRV-961	1420	_	_	_	vOTU-42133	DP149__1039
DSCRV-962	1420	_	_	_	vOTU-59227	DP189__13384
DSCRV-963	1418	_	_	_	vOTU-23042	DP088__16833
DSCRV-964	1418	_	_	_	vOTU-5868	DP007__10121
DSCRV-965	1418	_	_	_	vOTU-9555	DP010__4574
DSCRV-966	1417	_	_	_	vOTU-20292	DP088__4763
DSCRV-967	1417	_	_	_	vOTU-21084	DP088__8227
DSCRV-968	1417	_	_	_	vOTU-64377	DP189__32843
DSCRV-969	1417	_	_	_	vOTU-68823	DP189__49526
DSCRV-970	1415	_	_	_	vOTU-44920	DP158__5345
DSCRV-971	1415	_	_	_	vOTU-60350	DP189__17652
DSCRV-972	1414	_	_	_	vOTU-24024	DP088__21075
DSCRV-973	1414	_	_	_	vOTU-32830	DP125__664
DSCRV-974	1413	_	_	_	vOTU-82147	DP212__1398
DSCRV-975	1412	_	_	_	vOTU-23822	DP088__20204
DSCRV-976	1412	_	_	_	vOTU-48540	DP160__3348
DSCRV-977	1412	_	_	_	vOTU-52831	DP166__2078
DSCRV-978	1412	_	_	_	vOTU-71222	DP193__4330
DSCRV-979	1412	_	_	_	vOTU-85046	DP227__3216
DSCRV-980	1411	_	_	_	vOTU-45743	DP158__12671
DSCRV-981	1411	_	_	_	vOTU-46964	DP158__23238
DSCRV-982	1406	_	_	_	vOTU-29780	DP099__6214
DSCRV-983	1406	_	_	_	vOTU-51722	DP163__8702
DSCRV-984	1404	_	_	_	vOTU-46121	DP158__15854
DSCRV-985	1404	_	_	_	vOTU-77546	DP198__4515
DSCRV-986	1403	_	_	_	vOTU-24496	DP088__23334
DSCRV-987	1402	_	_	_	vOTU-23929	DP088__20679
DSCRV-988	1401	_	_	_	vOTU-75076	DP193__22840
DSCRV-989	1399	_	_	_	vOTU-53877	DP173__641
DSCRV-990	1398	_	_	_	vOTU-3078	DP006__8942
DSCRV-991	1398	_	_	_	vOTU-75703	DP193__25831
DSCRV-992	1398	_	_	_	vOTU-8459	DP009__3950
DSCRV-993	1396	_	_	_	vOTU-56198	DP189__2340
DSCRV-994	1395	_	_	_	vOTU-2189	DP006__2723
DSCRV-995	1395	_	_	_	vOTU-5192	DP007__7536
DSCRV-996	1394	_	_	_	vOTU-71931	DP193__7701
DSCRV-997	1392	_	_	_	vOTU-37156	DP129__3916
DSCRV-998	1392	_	_	_	vOTU-61896	DP189__23545
DSCRV-999	1391	_	_	_	vOTU-9937	DP031__1450
DSCRV-1000	1390	_	_	_	vOTU-41595	DP143__1615
DSCRV-1001	1390	_	_	_	vOTU-52621	DP166__54
DSCRV-1002	1388	_	_	_	vOTU-14047	DP057__12451
DSCRV-1003	1388	_	_	_	vOTU-30048	DP099__7667
DSCRV-1004	1388	_	_	_	vOTU-8664	DP010__12
DSCRV-1005	1386	_	_	_	vOTU-42978	DP149__6224
DSCRV-1006	1384	_	_	_	vOTU-39123	DP129__12011
DSCRV-1007	1384	_	_	_	vOTU-41177	DP132__1492
DSCRV-1008	1383	_	_	_	vOTU-10646	DP055__2253
DSCRV-1009	1382	_	_	_	vOTU-74545	DP193__20320
DSCRV-1010	1376	_	_	_	vOTU-17608	DP078__2281
DSCRV-1011	1376	_	_	_	vOTU-23627	DP088__19223
DSCRV-1012	1375	_	_	_	vOTU-21864	DP088__11772
DSCRV-1013	1375	_	_	_	vOTU-46232	DP158__16846
DSCRV-1014	1374	_	_	_	vOTU-46835	DP158__22095
DSCRV-1015	1373	_	_	_	vOTU-43348	DP149__8492
DSCRV-1016	1371	_	_	_	vOTU-50550	DP163__3221
DSCRV-1017	1371	_	_	_	vOTU-83890	DP221__2110
DSCRV-1018	1369	_	_	_	vOTU-29185	DP099__3215
DSCRV-1019	1369	_	_	_	vOTU-38244	DP129__8318
DSCRV-1020	1368	_	_	_	vOTU-2666	DP006__5990
DSCRV-1021	1367	_	_	_	vOTU-17694	DP078__3859
DSCRV-1022	1367	_	_	_	vOTU-46005	DP158__14863
DSCRV-1023	1367	_	_	_	vOTU-48619	DP160__4317
DSCRV-1024	1366	Metaviridae	_	plant	vOTU-41638	DP145__599
DSCRV-1025	1366	Metaviridae	_	plant	vOTU-41515	DP141__286
DSCRV-1026	1366	Metaviridae	_	plant	vOTU-41605	DP144__140
DSCRV-1027	1366	Metaviridae	_	plant	vOTU-82870	DP216__1769
DSCRV-1028	1366	Metaviridae	_	plant	vOTU-53546	DP168__576
DSCRV-1029	1366	Metaviridae	_	plant	vOTU-44165	DP156__111
DSCRV-1030	1365	_	_	_	vOTU-49627	DP162__718
DSCRV-1031	1364	_	_	_	vOTU-5079	DP007__7100
DSCRV-1032	1363	_	_	_	vOTU-1652	DP005__1030
DSCRV-1033	1362	_	_	_	vOTU-43126	DP149__7162
DSCRV-1034	1361	_	_	_	vOTU-1969	DP006__1186
DSCRV-1035	1361	_	_	_	vOTU-51569	DP163__7998
DSCRV-1036	1361	_	_	_	vOTU-52936	DP166__3017
DSCRV-1037	1359	_	_	_	vOTU-3085	DP006__8975
DSCRV-1038	1358	_	_	_	vOTU-52672	DP166__569
DSCRV-1039	1356	_	_	_	vOTU-42943	DP149__6031
DSCRV-1040	1354	_	_	_	vOTU-82154	DP212__1458
DSCRV-1041	1353	_	_	_	vOTU-12728	DP057__7485
DSCRV-1042	1352	_	_	_	vOTU-19569	DP088__1534
DSCRV-1043	1352	_	_	_	vOTU-45648	DP158__11889
DSCRV-1044	1352	_	_	_	vOTU-49711	DP162__1306
DSCRV-1045	1349	_	_	_	vOTU-4032	DP007__2954
DSCRV-1046	1349	_	_	_	vOTU-46294	DP158__17436
DSCRV-1047	1349	_	_	_	vOTU-56255	DP189__2523
DSCRV-1048	1348	_	_	_	vOTU-59532	DP189__14589
DSCRV-1049	1346	_	_	_	vOTU-8665	DP010__16
DSCRV-1050	1345	_	_	_	vOTU-42068	DP149__686
DSCRV-1051	1345	_	_	_	vOTU-63052	DP189__27767
DSCRV-1052	1343	_	_	_	vOTU-22979	DP088__16559
DSCRV-1053	1342	_	_	_	vOTU-42112	DP149__923
DSCRV-1054	1341	_	_	_	vOTU-32155	DP120__4086
DSCRV-1055	1340	_	_	_	vOTU-78067	DP200__1047
DSCRV-1056	1340	_	_	_	vOTU-80671	DP209__2063
DSCRV-1057	1338	_	_	_	vOTU-42022	DP149__444
DSCRV-1058	1338	_	_	_	vOTU-42763	DP149__4844
DSCRV-1059	1337	_	_	_	vOTU-24503	DP088__23379
DSCRV-1060	1337	_	_	_	vOTU-35629	DP128__482
DSCRV-1061	1337	_	_	_	vOTU-70095	DP192__1279
DSCRV-1062	1336	_	_	_	vOTU-33849	DP125__4798
DSCRV-1063	1334	_	_	_	vOTU-25088	DP091__694
DSCRV-1064	1333	_	_	_	vOTU-41458	DP132__3205
DSCRV-1065	1333	_	_	_	vOTU-42202	DP149__1434
DSCRV-1066	1331	_	_	_	vOTU-21456	DP088__9904
DSCRV-1067	1330	_	_	_	vOTU-21190	DP088__8675
DSCRV-1068	1329	_	_	_	vOTU-26986	DP095__17867
DSCRV-1069	1329	_	_	_	vOTU-37170	DP129__3977
DSCRV-1070	1327	_	_	_	vOTU-61629	DP189__22456
DSCRV-1071	1325	_	_	_	vOTU-69331	DP191__1280
DSCRV-1072	1322	_	_	_	vOTU-22386	DP088__14070
DSCRV-1073	1322	_	_	_	vOTU-39840	DP129__15101
DSCRV-1074	1322	Pseudoviridae	Penicillium camemberti virus - GP1	fungus	vOTU-45191	DP158__7736
DSCRV-1075	1320	_	_	_	vOTU-67430	DP189__44264
DSCRV-1076	1319	_	_	_	vOTU-43947	DP154__1615
DSCRV-1077	1318	_	_	_	vOTU-12805	DP057__7810
DSCRV-1078	1318	_	_	_	vOTU-49595	DP162__540
DSCRV-1079	1317	_	_	_	vOTU-47081	DP158__24095
DSCRV-1080	1316	_	_	_	vOTU-4615	DP007__5363
DSCRV-1081	1315	_	_	_	vOTU-51283	DP163__6669
DSCRV-1082	1314	_	_	_	vOTU-37576	DP129__5527
DSCRV-1083	1314	_	_	_	vOTU-46605	DP158__20106
DSCRV-1084	1312	_	_	_	vOTU-18194	DP081__3052
DSCRV-1085	1312	_	_	_	vOTU-36041	DP128__4010
DSCRV-1086	1311	_	_	_	vOTU-54550	DP180__950
DSCRV-1087	1311	_	_	_	vOTU-84083	DP221__6184
DSCRV-1088	1310	_	_	_	vOTU-27723	DP098__3627
DSCRV-1089	1309	_	_	_	vOTU-3375	DP007__507
DSCRV-1090	1309	_	_	_	vOTU-47849	DP158__30887
DSCRV-1091	1309	_	_	_	vOTU-54722	DP182__1375
DSCRV-1092	1309	_	_	_	vOTU-72047	DP193__8201
DSCRV-1093	1309	_	_	_	vOTU-78626	DP201__2298
DSCRV-1094	1307	_	_	_	vOTU-77712	DP198__6147
DSCRV-1095	1306	_	_	_	vOTU-58900	DP189__12188
DSCRV-1096	1305	_	_	_	vOTU-43459	DP149__9129
DSCRV-1097	1305	_	_	_	vOTU-80078	DP205__4279
DSCRV-1098	1304	_	_	_	vOTU-81550	DP210__5168
DSCRV-1099	1303	_	_	_	vOTU-2264	DP006__3192
DSCRV-1100	1300	_	_	_	vOTU-21373	DP088__9510
DSCRV-1101	1300	_	_	_	vOTU-56502	DP189__3372
DSCRV-1102	1299	_	_	_	vOTU-43029	DP149__6506
DSCRV-1103	1298	_	_	_	vOTU-36384	DP129__826
DSCRV-1104	1296	_	_	_	vOTU-48239	DP158__34275
DSCRV-1105	1296	_	_	_	vOTU-61194	DP189__20765
DSCRV-1106	1294	_	_	_	vOTU-41644	DP145__807
DSCRV-1107	1293	_	_	_	vOTU-26124	DP095__6980
DSCRV-1108	1290	_	_	_	vOTU-7224	DP007__15418
DSCRV-1109	1289	_	_	_	vOTU-10076	DP042__137
DSCRV-1110	1289	_	_	_	vOTU-31321	DP118__3345
DSCRV-1111	1289	_	_	_	vOTU-76320	DP196__19
DSCRV-1112	1289	_	_	_	vOTU-82789	DP215__1739
DSCRV-1113	1289	_	_	_	vOTU-82892	DP217__1193
DSCRV-1114	1288	_	_	_	vOTU-76085	DP193__27734
DSCRV-1115	1287	_	_	_	vOTU-55870	DP189__1166
DSCRV-1116	1286	_	_	_	vOTU-11756	DP057__3953
DSCRV-1117	1286	_	_	_	vOTU-69685	DP191__4190
DSCRV-1118	1284	_	_	_	vOTU-21358	DP088__9438
DSCRV-1119	1283	_	_	_	vOTU-84135	DP222__830
DSCRV-1120	1283	_	_	_	vOTU-84236	DP223__1071
DSCRV-1121	1282	_	_	_	vOTU-43250	DP149__7988
DSCRV-1122	1280	_	_	_	vOTU-20968	DP088__7785
DSCRV-1123	1277	_	_	_	vOTU-72026	DP193__8100
DSCRV-1124	1277	_	_	_	vOTU-82851	DP216__1280
DSCRV-1125	1276	_	_	_	vOTU-32149	DP120__4049
DSCRV-1126	1276	_	_	_	vOTU-74185	DP193__18487
DSCRV-1127	1274	_	_	_	vOTU-44995	DP158__6049
DSCRV-1128	1270	_	_	_	vOTU-22252	DP088__13502
DSCRV-1129	1270	_	_	_	vOTU-35834	DP128__2264
DSCRV-1130	1270	_	_	_	vOTU-71942	DP193__7735
DSCRV-1131	1269	_	_	_	vOTU-79879	DP205__3329
DSCRV-1132	1268	_	_	_	vOTU-19793	DP088__2667
DSCRV-1133	1268	_	_	_	vOTU-21605	DP088__10635
DSCRV-1134	1268	_	_	_	vOTU-24166	DP088__21741
DSCRV-1135	1268	_	_	_	vOTU-54251	DP176__1667
DSCRV-1136	1267	_	_	_	vOTU-74987	DP193__22393
DSCRV-1137	1266	_	_	_	vOTU-42046	DP149__572
DSCRV-1138	1265	_	_	_	vOTU-19483	DP088__1136
DSCRV-1139	1262	_	_	_	vOTU-53205	DP166__5352
DSCRV-1140	1262	_	_	_	vOTU-84761	DP224__3283
DSCRV-1141	1261	_	_	_	vOTU-42645	DP149__4122
DSCRV-1142	1261	_	_	_	vOTU-5864	DP007__10111
DSCRV-1143	1260	_	_	_	vOTU-20862	DP088__7298
DSCRV-1144	1260	_	_	_	vOTU-24280	DP088__22307
DSCRV-1145	1260	_	_	_	vOTU-42964	DP149__6155
DSCRV-1146	1259	_	_	_	vOTU-85007	DP227__1780
DSCRV-1147	1258	_	_	_	vOTU-13616	DP057__10856
DSCRV-1148	1258	_	_	_	vOTU-30329	DP117__1045
DSCRV-1149	1258	_	_	_	vOTU-7927	DP008__785
DSCRV-1150	1257	_	_	_	vOTU-18526	DP081__5636
DSCRV-1151	1257	_	_	_	vOTU-21841	DP088__11679
DSCRV-1152	1256	_	_	_	vOTU-42439	DP149__2934
DSCRV-1153	1256	_	_	_	vOTU-43486	DP149__9234
DSCRV-1154	1255	_	_	_	vOTU-17502	DP078__747
DSCRV-1155	1255	_	_	_	vOTU-3020	DP006__8559
DSCRV-1156	1253	_	_	_	vOTU-44573	DP158__2016
DSCRV-1157	1251	_	_	_	vOTU-47607	DP158__28650
DSCRV-1158	1251	_	_	_	vOTU-81097	DP209__8556
DSCRV-1159	1250	_	_	_	vOTU-11687	DP057__3664
DSCRV-1160	1250	_	_	_	vOTU-21099	DP088__8286
DSCRV-1161	1248	_	_	_	vOTU-47515	DP158__27806
DSCRV-1162	1247	_	_	_	vOTU-22964	DP088__16507
DSCRV-1163	1247	_	_	_	vOTU-49992	DP163__573
DSCRV-1164	1247	_	_	_	vOTU-71514	DP193__5634
DSCRV-1165	1245	_	_	_	vOTU-43474	DP149__9188
DSCRV-1166	1245	_	_	_	vOTU-80989	DP209__7054
DSCRV-1167	1244	_	_	_	vOTU-18641	DP081__6532
DSCRV-1168	1244	_	_	_	vOTU-53724	DP171__3062
DSCRV-1169	1244	_	_	_	vOTU-85028	DP227__2634
DSCRV-1170	1243	_	_	_	vOTU-2875	DP006__7572
DSCRV-1171	1243	_	_	_	vOTU-32250	DP120__4530
DSCRV-1172	1242	_	_	_	vOTU-55358	DP186__3895
DSCRV-1173	1242	_	_	_	vOTU-82083	DP212__993
DSCRV-1174	1241	_	_	_	vOTU-2306	DP006__3414
DSCRV-1175	1240	_	_	_	vOTU-53735	DP171__3375
DSCRV-1176	1239	_	_	_	vOTU-9830	DP026__689
DSCRV-1177	1238	_	_	_	vOTU-41623	DP145__99
DSCRV-1178	1238	_	_	_	vOTU-54852	DP184__853
DSCRV-1179	1238	_	_	_	vOTU-84186	DP222__2211
DSCRV-1180	1238	_	_	_	vOTU-84233	DP223__1009
DSCRV-1181	1237	_	_	_	vOTU-44090	DP155__1344
DSCRV-1182	1237	_	_	_	vOTU-54087	DP176__345
DSCRV-1183	1237	_	_	_	vOTU-80845	DP209__4953
DSCRV-1184	1236	_	_	_	vOTU-26485	DP095__11477
DSCRV-1185	1235	_	_	_	vOTU-77107	DP197__4695
DSCRV-1186	1234	_	_	_	vOTU-41157	DP132__1351
DSCRV-1187	1234	_	_	_	vOTU-81033	DP209__7514
DSCRV-1188	1233	_	_	_	vOTU-13342	DP057__9844
DSCRV-1189	1233	_	_	_	vOTU-35781	DP128__1708
DSCRV-1190	1233	_	_	_	vOTU-36090	DP128__4355
DSCRV-1191	1231	_	_	_	vOTU-24572	DP088__23695
DSCRV-1192	1231	_	_	_	vOTU-34224	DP125__6294
DSCRV-1193	1231	_	_	_	vOTU-8009	DP008__1522
DSCRV-1194	1230	_	_	_	vOTU-1888	DP006__639
DSCRV-1195	1229	_	_	_	vOTU-31807	DP120__2165
DSCRV-1196	1229	_	_	_	vOTU-76132	DP193__27972
DSCRV-1197	1227	_	_	_	vOTU-14061	DP057__12510
DSCRV-1198	1227	_	_	_	vOTU-25446	DP091__4947
DSCRV-1199	1227	_	_	_	vOTU-32400	DP122__1257
DSCRV-1200	1227	_	_	_	vOTU-41035	DP132__604
DSCRV-1201	1227	_	_	_	vOTU-41622	DP145__83
DSCRV-1202	1226	_	_	_	vOTU-69958	DP191__6408
DSCRV-1203	1225	_	_	_	vOTU-17821	DP081__188
DSCRV-1204	1225	_	_	_	vOTU-35671	DP128__970
DSCRV-1205	1224	_	_	_	vOTU-14564	DP057__14525
DSCRV-1206	1224	_	_	_	vOTU-3228	DP006__10008
DSCRV-1207	1224	_	_	_	vOTU-45027	DP158__6311
DSCRV-1208	1223	_	_	_	vOTU-43535	DP149__9535
DSCRV-1209	1223	_	_	_	vOTU-69499	DP191__2570
DSCRV-1210	1222	_	_	_	vOTU-23743	DP088__19840
DSCRV-1211	1222	_	_	_	vOTU-2459	DP006__4474
DSCRV-1212	1222	_	_	_	vOTU-76580	DP197__1243
DSCRV-1213	1222	_	_	_	vOTU-9363	DP010__3646
DSCRV-1214	1220	_	_	_	vOTU-19383	DP088__751
DSCRV-1215	1220	_	_	_	vOTU-45652	DP158__11900
DSCRV-1216	1219	_	_	_	vOTU-31309	DP118__2374
DSCRV-1217	1219	_	_	_	vOTU-41521	DP141__545
DSCRV-1218	1219	_	_	_	vOTU-41608	DP144__318
DSCRV-1219	1219	_	_	_	vOTU-41696	DP147__1163
DSCRV-1220	1219	_	_	_	vOTU-44199	DP156__731
DSCRV-1221	1219	_	_	_	vOTU-54771	DP182__2175
DSCRV-1222	1219	_	_	_	vOTU-77151	DP198__7
DSCRV-1223	1217	_	_	_	vOTU-14390	DP057__13820
DSCRV-1224	1217	_	_	_	vOTU-36976	DP129__3232
DSCRV-1225	1216	_	_	_	vOTU-30506	DP117__2281
DSCRV-1226	1216	_	_	_	vOTU-448	DP003__2876
DSCRV-1227	1216	_	_	_	vOTU-48685	DP160__5248
DSCRV-1228	1215	_	_	_	vOTU-14919	DP057__15815
DSCRV-1229	1215	_	_	_	vOTU-17651	DP078__3015
DSCRV-1230	1215	_	_	_	vOTU-35538	DP126__789
DSCRV-1231	1215	_	_	_	vOTU-37042	DP129__3491
DSCRV-1232	1215	_	_	_	vOTU-41102	DP132__1019
DSCRV-1233	1215	_	_	_	vOTU-8147	DP008__3198
DSCRV-1234	1214	_	_	_	vOTU-37985	DP129__7203
DSCRV-1235	1214	_	_	_	vOTU-48824	DP160__7165
DSCRV-1236	1213	_	_	_	vOTU-16236	DP058__1140
DSCRV-1237	1212	_	_	_	vOTU-18625	DP081__6407
DSCRV-1238	1211	_	_	_	vOTU-29290	DP099__3737
DSCRV-1239	1211	_	_	_	vOTU-70036	DP192__194
DSCRV-1240	1210	_	_	_	vOTU-1556	DP005__267
DSCRV-1241	1210	_	_	_	vOTU-27644	DP098__3259
DSCRV-1242	1210	_	_	_	vOTU-42607	DP149__3918
DSCRV-1243	1210	_	_	_	vOTU-47231	DP158__25286
DSCRV-1244	1208	_	_	_	vOTU-37034	DP129__3454
DSCRV-1245	1208	_	_	_	vOTU-44184	DP156__563
DSCRV-1246	1208	_	_	_	vOTU-53708	DP171__2540
DSCRV-1247	1208	_	_	_	vOTU-54235	DP176__1558
DSCRV-1248	1206	_	_	_	vOTU-78718	DP202__483
DSCRV-1249	1205	_	_	_	vOTU-41686	DP147__834
DSCRV-1250	1205	_	_	_	vOTU-82812	DP216__78
DSCRV-1251	1204	_	_	_	vOTU-41337	DP132__2474
DSCRV-1252	1203	_	_	_	vOTU-81527	DP210__4968
DSCRV-1253	1202	_	_	_	vOTU-54512	DP179__984
DSCRV-1254	1202	_	_	_	vOTU-71598	DP193__6053
DSCRV-1255	1200	_	_	_	vOTU-10638	DP055__1948
DSCRV-1256	1200	_	_	_	vOTU-43078	DP149__6881
DSCRV-1257	1200	_	_	_	vOTU-53090	DP166__4346
DSCRV-1258	1199	_	_	_	vOTU-20087	DP088__3971
DSCRV-1259	1199	_	_	_	vOTU-2565	DP006__5271
DSCRV-1260	1199	_	_	_	vOTU-52872	DP166__2372
DSCRV-1261	1199	_	_	_	vOTU-73990	DP193__17551
DSCRV-1262	1198	_	_	_	vOTU-26438	DP095__10866
DSCRV-1263	1198	_	_	_	vOTU-28776	DP099__1295
DSCRV-1264	1198	_	_	_	vOTU-77732	DP198__6337
DSCRV-1265	1196	_	_	_	vOTU-31552	DP120__865
DSCRV-1266	1195	_	_	_	vOTU-35908	DP128__2912
DSCRV-1267	1194	_	_	_	vOTU-32606	DP124__1409
DSCRV-1268	1193	_	_	_	vOTU-43153	DP149__7326
DSCRV-1269	1193	_	_	_	vOTU-49116	DP160__12014
DSCRV-1270	1192	_	_	_	vOTU-44195	DP156__703
DSCRV-1271	1191	_	_	_	vOTU-48174	DP158__33785
DSCRV-1272	1190	_	_	_	vOTU-21968	DP088__12217
DSCRV-1273	1189	_	_	_	vOTU-41636	DP145__538
DSCRV-1274	1188	_	_	_	vOTU-2031	DP006__1686
DSCRV-1275	1188	_	_	_	vOTU-25250	DP091__2456
DSCRV-1276	1188	_	_	_	vOTU-25566	DP091__6365
DSCRV-1277	1188	_	_	_	vOTU-32105	DP120__3823
DSCRV-1278	1188	_	_	_	vOTU-4599	DP007__5302
DSCRV-1279	1188	_	_	_	vOTU-8105	DP008__2741
DSCRV-1280	1187	_	_	_	vOTU-53737	DP171__3424
DSCRV-1281	1187	_	_	_	vOTU-64234	DP189__32337
DSCRV-1282	1187	_	_	_	vOTU-69327	DP191__1253
DSCRV-1283	1186	_	_	_	vOTU-21629	DP088__10718
DSCRV-1284	1186	_	_	_	vOTU-2651	DP006__5884
DSCRV-1285	1186	_	_	_	vOTU-46782	DP158__21608
DSCRV-1286	1185	_	_	_	vOTU-35879	DP128__2676
DSCRV-1287	1184	_	_	_	vOTU-17570	DP078__1825
DSCRV-1288	1184	_	_	_	vOTU-2177	DP006__2648
DSCRV-1289	1184	_	_	_	vOTU-78453	DP201__416
DSCRV-1290	1183	_	_	_	vOTU-10088	DP042__525
DSCRV-1291	1183	_	_	_	vOTU-18727	DP081__7224
DSCRV-1292	1183	_	_	_	vOTU-31298	DP118__1104
DSCRV-1293	1183	_	_	_	vOTU-48830	DP160__7244
DSCRV-1294	1183	_	_	_	vOTU-54943	DP185__1689
DSCRV-1295	1183	_	_	_	vOTU-76345	DP196__855
DSCRV-1296	1183	_	_	_	vOTU-80398	DP206__1588
DSCRV-1297	1183	_	_	_	vOTU-82810	DP215__3682
DSCRV-1298	1182	_	_	_	vOTU-52777	DP166__1633
DSCRV-1299	1181	_	_	_	vOTU-35970	DP128__3375
DSCRV-1300	1181	_	_	_	vOTU-84258	DP223__1362
DSCRV-1301	1180	_	_	_	vOTU-47565	DP158__28243
DSCRV-1302	1179	_	_	_	vOTU-993	DP003__7018
DSCRV-1303	1178	_	_	_	vOTU-40978	DP132__197
DSCRV-1304	1177	_	_	_	vOTU-10087	DP042__515
DSCRV-1305	1177	_	_	_	vOTU-42110	DP149__915
DSCRV-1306	1177	_	_	_	vOTU-6141	DP007__11190
DSCRV-1307	1177	_	_	_	vOTU-84217	DP223__566
DSCRV-1308	1175	_	_	_	vOTU-57386	DP189__6554
DSCRV-1309	1174	_	_	_	vOTU-16096	DP058__357
DSCRV-1310	1174	_	_	_	vOTU-17329	DP058__7791
DSCRV-1311	1174	_	_	_	vOTU-18256	DP081__3466
DSCRV-1312	1173	_	_	_	vOTU-23556	DP088__18937
DSCRV-1313	1172	_	_	_	vOTU-11660	DP057__3565
DSCRV-1314	1172	_	_	_	vOTU-28663	DP099__715
DSCRV-1315	1171	_	_	_	vOTU-53467	DP166__7532
DSCRV-1316	1170	_	_	_	vOTU-68844	DP189__49596
DSCRV-1317	1170	_	_	_	vOTU-74361	DP193__19420
DSCRV-1318	1168	_	_	_	vOTU-22710	DP088__15450
DSCRV-1319	1168	_	_	_	vOTU-48999	DP160__10172
DSCRV-1320	1164	_	_	_	vOTU-2678	DP006__6071
DSCRV-1321	1163	_	_	_	vOTU-43891	DP154__402
DSCRV-1322	1162	_	_	_	vOTU-31049	DP117__6155
DSCRV-1323	1161	_	_	_	vOTU-75432	DP193__24497
DSCRV-1324	1160	_	_	_	vOTU-47153	DP158__24637
DSCRV-1325	1160	_	_	_	vOTU-9413	DP010__3872
DSCRV-1326	1158	_	_	_	vOTU-38959	DP129__11332
DSCRV-1327	1157	_	_	_	vOTU-19467	DP088__1060
DSCRV-1328	1157	_	_	_	vOTU-48292	DP158__34613
DSCRV-1329	1156	_	_	_	vOTU-42975	DP149__6211
DSCRV-1330	1156	_	_	_	vOTU-8144	DP008__3176
DSCRV-1331	1155	_	_	_	vOTU-53485	DP166__7747
DSCRV-1332	1154	_	_	_	vOTU-18833	DP081__8048
DSCRV-1333	1154	_	_	_	vOTU-26012	DP095__5464
DSCRV-1334	1154	_	_	_	vOTU-47225	DP158__25214
DSCRV-1335	1154	_	_	_	vOTU-54685	DP182__719
DSCRV-1336	1153	_	_	_	vOTU-41514	DP141__110
DSCRV-1337	1153	_	_	_	vOTU-82607	DP212__4433
DSCRV-1338	1152	_	_	_	vOTU-21090	DP088__8245
DSCRV-1339	1152	_	_	_	vOTU-24708	DP088__24417
DSCRV-1340	1152	_	_	_	vOTU-42278	DP149__1966
DSCRV-1341	1152	_	_	_	vOTU-69589	DP191__3362
DSCRV-1342	1151	_	_	_	vOTU-48516	DP160__2989
DSCRV-1343	1149	_	_	_	vOTU-381	DP003__2465
DSCRV-1344	1148	_	_	_	vOTU-51624	DP163__8273
DSCRV-1345	1148	_	_	_	vOTU-63214	DP189__28405
DSCRV-1346	1147	_	_	_	vOTU-68498	DP189__48266
DSCRV-1347	1147	_	_	_	vOTU-81134	DP209__9169
DSCRV-1348	1146	_	_	_	vOTU-52387	DP165__2498
DSCRV-1349	1146	_	_	_	vOTU-63033	DP189__27709
DSCRV-1350	1146	_	_	_	vOTU-77104	DP197__4692
DSCRV-1351	1145	_	_	_	vOTU-35814	DP128__2061
DSCRV-1352	1145	_	_	_	vOTU-53640	DP171__739
DSCRV-1353	1144	_	_	_	vOTU-65044	DP189__35404
DSCRV-1354	1143	_	_	_	vOTU-49809	DP162__1950
DSCRV-1355	1143	_	_	_	vOTU-73535	DP193__15370
DSCRV-1356	1143	_	_	_	vOTU-7891	DP008__446
DSCRV-1357	1142	_	_	_	vOTU-14844	DP057__15547
DSCRV-1358	1142	_	_	_	vOTU-22832	DP088__15939
DSCRV-1359	1142	_	_	_	vOTU-5715	DP007__9524
DSCRV-1360	1142	_	_	_	vOTU-836	DP003__5751
DSCRV-1361	1141	_	_	_	vOTU-19346	DP088__598
DSCRV-1362	1140	_	_	_	vOTU-11581	DP057__3276
DSCRV-1363	1140	_	_	_	vOTU-54276	DP176__1841
DSCRV-1364	1139	_	_	_	vOTU-43488	DP149__9249
DSCRV-1365	1139	_	_	_	vOTU-66299	DP189__40075
DSCRV-1366	1137	_	_	_	vOTU-15243	DP057__16981
DSCRV-1367	1137	_	_	_	vOTU-1647	DP005__997
DSCRV-1368	1137	_	_	_	vOTU-23271	DP088__17819
DSCRV-1369	1137	_	_	_	vOTU-29678	DP099__5678
DSCRV-1370	1137	_	_	_	vOTU-53523	DP168__170
DSCRV-1371	1137	_	_	_	vOTU-54749	DP182__1733
DSCRV-1372	1137	_	_	_	vOTU-84267	DP223__1551
DSCRV-1373	1136	_	_	_	vOTU-23261	DP088__17763
DSCRV-1374	1136	_	_	_	vOTU-47560	DP158__28175
DSCRV-1375	1135	_	_	_	vOTU-15708	DP057__18774
DSCRV-1376	1134	_	_	_	vOTU-45171	DP158__7541
DSCRV-1377	1134	_	_	_	vOTU-59793	DP189__15621
DSCRV-1378	1132	_	_	_	vOTU-53702	DP171__2327
DSCRV-1379	1131	_	_	_	vOTU-24389	DP088__22818
DSCRV-1380	1131	_	_	_	vOTU-29916	DP099__6985
DSCRV-1381	1130	_	_	_	vOTU-24819	DP088__24931
DSCRV-1382	1130	_	_	_	vOTU-5723	DP007__9543
DSCRV-1383	1129	_	_	_	vOTU-28645	DP099__623
DSCRV-1384	1128	_	_	_	vOTU-12573	DP057__6904
DSCRV-1385	1128	_	_	_	vOTU-17967	DP081__1365
DSCRV-1386	1128	_	_	_	vOTU-43115	DP149__7075
DSCRV-1387	1128	_	_	_	vOTU-453	DP003__2915
DSCRV-1388	1128	_	_	_	vOTU-9485	DP010__4225
DSCRV-1389	1127	_	_	_	vOTU-35950	DP128__3247
DSCRV-1390	1125	_	_	_	vOTU-24784	DP088__24799
DSCRV-1391	1125	_	_	_	vOTU-77562	DP198__4672
DSCRV-1392	1124	_	_	_	vOTU-35650	DP128__751
DSCRV-1393	1123	_	_	_	vOTU-75731	DP193__26004
DSCRV-1394	1121	_	_	_	vOTU-10732	DP057__206
DSCRV-1395	1121	_	_	_	vOTU-20049	DP088__3828
DSCRV-1396	1121	_	_	_	vOTU-72542	DP193__10687
DSCRV-1397	1120	_	_	_	vOTU-19497	DP088__1202
DSCRV-1398	1119	_	_	_	vOTU-29140	DP099__2999
DSCRV-1399	1118	_	_	_	vOTU-15710	DP057__18777
DSCRV-1400	1117	_	_	_	vOTU-72611	DP193__11029
DSCRV-1401	1116	_	_	_	vOTU-75511	DP193__24901
DSCRV-1402	1113	_	_	_	vOTU-19722	DP088__2370
DSCRV-1403	1113	_	_	_	vOTU-23487	DP088__18655
DSCRV-1404	1113	_	_	_	vOTU-38398	DP129__9002
DSCRV-1405	1113	_	_	_	vOTU-44269	DP157__1430
DSCRV-1406	1111	_	_	_	vOTU-23441	DP088__18470
DSCRV-1407	1108	_	_	_	vOTU-516	DP003__3366
DSCRV-1408	1107	_	_	_	vOTU-8598	DP009__6612
DSCRV-1409	1106	_	_	_	vOTU-61951	DP189__23746
DSCRV-1410	1105	_	_	_	vOTU-53110	DP166__4538
DSCRV-1411	1103	_	_	_	vOTU-19558	DP088__1461
DSCRV-1412	1103	_	_	_	vOTU-52961	DP166__3235
DSCRV-1413	1102	_	_	_	vOTU-84595	DP224__2122
DSCRV-1414	1100	_	_	_	vOTU-46875	DP158__22434
DSCRV-1415	1099	_	_	_	vOTU-19745	DP088__2462
DSCRV-1416	1099	_	_	_	vOTU-45255	DP158__8426
DSCRV-1417	1098	_	_	_	vOTU-329	DP003__2164
DSCRV-1418	1097	_	_	_	vOTU-18444	DP081__4941
DSCRV-1419	1095	_	_	_	vOTU-39434	DP129__13319
DSCRV-1420	1094	_	_	_	vOTU-60860	DP189__19522
DSCRV-1421	1091	_	_	_	vOTU-12923	DP057__8291
DSCRV-1422	1089	_	_	_	vOTU-2347	DP006__3674
DSCRV-1423	1088	_	_	_	vOTU-46811	DP158__21921
DSCRV-1424	1088	_	_	_	vOTU-69401	DP191__1732
DSCRV-1425	1086	_	_	_	vOTU-21334	DP088__9309
DSCRV-1426	1085	_	_	_	vOTU-45591	DP158__11510
DSCRV-1427	1084	_	_	_	vOTU-14327	DP057__13585
DSCRV-1428	1084	_	_	_	vOTU-77448	DP198__3249
DSCRV-1429	1083	_	_	_	vOTU-34827	DP125__8693
DSCRV-1430	1083	_	_	_	vOTU-61672	DP189__22645
DSCRV-1431	1083	_	_	_	vOTU-67205	DP189__43413
DSCRV-1432	1082	_	_	_	vOTU-56110	DP189__2035
DSCRV-1433	1079	_	_	_	vOTU-46800	DP158__21796
DSCRV-1434	1079	_	_	_	vOTU-47477	DP158__27508
DSCRV-1435	1078	_	_	_	vOTU-53934	DP173__1505
DSCRV-1436	1076	_	_	_	vOTU-44740	DP158__3556
DSCRV-1437	1076	_	_	_	vOTU-74139	DP193__18300
DSCRV-1438	1074	_	_	_	vOTU-495	DP003__3214
DSCRV-1439	1073	_	_	_	vOTU-16102	DP058__394
DSCRV-1440	1073	_	_	_	vOTU-24049	DP088__21182
DSCRV-1441	1072	_	_	_	vOTU-45978	DP158__14629
DSCRV-1442	1072	_	_	_	vOTU-47609	DP158__28660
DSCRV-1443	1072	_	_	_	vOTU-79837	DP205__3103
DSCRV-1444	1070	_	_	_	vOTU-54038	DP175__2282
DSCRV-1445	1069	_	_	_	vOTU-47128	DP158__24496
DSCRV-1446	1069	_	_	_	vOTU-48888	DP160__8332
DSCRV-1447	1068	_	_	_	vOTU-46250	DP158__17034
DSCRV-1448	1063	_	_	_	vOTU-29388	DP099__4200
DSCRV-1449	1062	_	_	_	vOTU-83254	DP218__2233
DSCRV-1450	1059	_	_	_	vOTU-71153	DP193__4071
DSCRV-1451	1058	_	_	_	vOTU-21560	DP088__10413
DSCRV-1452	1058	_	_	_	vOTU-45198	DP158__7876
DSCRV-1453	1056	_	_	_	vOTU-34779	DP125__8488
DSCRV-1454	1056	_	_	_	vOTU-73967	DP193__17392
DSCRV-1455	1054	_	_	_	vOTU-7370	DP007__15973
DSCRV-1456	1054	_	_	_	vOTU-74453	DP193__19853
DSCRV-1457	1052	_	_	_	vOTU-20038	DP088__3769
DSCRV-1458	1052	_	_	_	vOTU-43221	DP149__7827
DSCRV-1459	1050	_	_	_	vOTU-77211	DP198__532
DSCRV-1460	1048	_	_	_	vOTU-73144	DP193__13669
DSCRV-1461	1045	_	_	_	vOTU-42704	DP149__4533
DSCRV-1462	1045	_	_	_	vOTU-71216	DP193__4292
DSCRV-1463	1044	_	_	_	vOTU-38426	DP129__9128
*It indicated the sequence numbers of viral contigs in our deep-sea viral metagenomic dataset (National Omics Data Encyclopedia database accession number OEP002537).
