# Supplementary material for: Environmental viromes reveal global virosphere of deep-sea RNA viruses
Source: Research Square preprint supplement (doi:10.21203/rs.3.rs-1294962/v1), 2022-02-10
Supplement: Supplementary file 6 [file 95a4e1ce8aca098918e8f8e1.xlsx]

## Sheet: Sheet1
Table S6. Diversity indices of 133 viromes.
Sample ID	Number of Reads	0.97*
		Number of vOTUs	Ace	Chao	Coverage	Shannon	Simpson
DP002	289929	919	4105	2655	0.99831	3.87	0.0333
DP003	349554	12522	208116	100538	0.971569	5.38	0.0129
DP004	397687	4011	23900	12513	0.993223	2.44	0.3423
DP005	29442	1705	9377	6748	0.964371	5.01	0.0462
DP006	590363	6936	46375	28861	0.993121	6.31	0.0043
DP007	309979	13419	55791	43170	0.975553	7.08	0.0026
DP008	172178	4273	76069	31785	0.980067	4.69	0.019
DP009	179771	3878	10938	8354	0.989058	4.73	0.0337
DP010	291435	4745	22414	15472	0.990502	4.75	0.0388
DP026	346748	1327	1637	1563	0.999054	3.66	0.0753
DP031	266314	2644	8257	5720	0.995212	4.74	0.0279
DP040	281955	1386	3053	2229	0.997918	2.53	0.1325
DP042	302247	1113	1309	1358	0.999166	3.36	0.1003
DP046	335644	884	2474	2016	0.998707	3.79	0.0431
DP047	279363	2307	8131	5940	0.995694	5.09	0.0092
DP049	326935	1902	4384	4005	0.997825	4.72	0.0513
DP052	277854	1032	9683	4989	0.997477	3.76	0.036
DP053	20322	936	24993	5970	0.968359	4.13	0.0827
DP055	482497	1497	5926	4034	0.998444	3.91	0.0574
DP057	399089	13896	41177	35251	0.982545	6.82	0.0048
DP058	417376	4745	15654	11385	0.99487	4.33	0.0658
DP059	187041	1602	3583	3195	0.996733	5.26	0.0112
DP060	212493	1572	2022	2125	0.997863	4.6	0.0201
DP078	336178	5132	38807	21901	0.989865	3.86	0.0784
DP081	314459	12417	146375	81305	0.970845	5.52	0.0193
DP082	24048	7538	729607	216543	0.699393	5.9	0.0432
DP086	360171	1491	1793	1766	0.99905	3.74	0.0563
DP088	510490	12755	24952	28585	0.99132	7.73	0.0013
DP089	15912	829	11073	3736	0.962544	3.97	0.0837
DP091	292053	5565	25930	17063	0.989231	5.92	0.0074
DP095	483809	5661	9728	8439	0.996571	6.3	0.0102
DP098	339449	4678	15241	15383	0.993183	4.78	0.0214
DP099	444242	6870	50590	32199	0.989715	5.35	0.0112
DP100	357067	2193	4829	3460	0.997477	4.02	0.051
DP117	435677	7027	40813	29153	0.990222	4.61	0.0442
DP118	126396	1687	2788	2615	0.995538	3.03	0.1893
DP119	18104	1199	18213	13237	0.947139	3.98	0.0911
DP120	435578	5085	34688	24045	0.992612	5.15	0.012
DP122	221254	1397	2181	1876	0.997406	3.25	0.0588
DP123	267152	662	5726	2889	0.998379	3.81	0.025
DP124	337203	1020	9775	6445	0.997903	3.53	0.0482
DP125	333516	8896	30583	30428	0.985851	6.06	0.0077
DP126	276198	2174	59257	22177	0.99294	0.45	0.8795
DP128	569381	4480	31519	17267	0.995249	5.63	0.008
DP129	353494	13646	45445	42207	0.980079	7.02	0.0034
DP132	429263	3504	31052	13507	0.994605	4.11	0.0352
DP141	309358	624	6290	3272	0.998529	3.42	0.036
DP142	311243	1290	11761	9125	0.996909	3.54	0.0335
DP143	268113	1139	2809	2239	0.998042	4.32	0.0278
DP144	315210	697	5474	6067	0.99829	3.4	0.0363
DP145	547469	747	3751	2426	0.999089	3.01	0.0737
DP146	243471	1015	2872	1972	0.998312	4.64	0.0309
DP147	325181	1184	24386	6698	0.997183	3.58	0.0329
DP148	317545	1187	5715	5341	0.99772	3.92	0.0237
DP149	513551	7979	34987	23461	0.991662	5.15	0.0354
DP150	364937	1073	2553	1989	0.998592	2.34	0.1395
DP151	317635	1490	12470	6081	0.99648	3.47	0.0352
DP152	307248	1570	5622	3415	0.997302	4.49	0.0218
DP153	357968	1496	1985	1899	0.99874	3.85	0.0695
DP154	662530	2297	8219	5706	0.998146	3.58	0.0511
DP155	255149	2383	13657	7392	0.99387	3.88	0.0422
DP156	256510	753	1169	1012	0.999224	3.69	0.07
DP157	468827	3069	3263	3213	0.999113	3.11	0.1026
DP158	543073	10594	27760	26415	0.991983	7.08	0.0028
DP159	370372	1261	8692	4784	0.997778	3.83	0.0387
DP160	328567	10383	89948	37318	0.977152	3.3	0.128
DP161	392715	2617	4419	4565	0.997696	4.7	0.0317
DP162	285792	2412	9432	6133	0.995283	3.85	0.0295
DP163	426282	10090	76434	47480	0.984142	6.28	0.0043
DP164	469604	5890	55140	27228	0.991212	5.04	0.0123
DP165	304727	1729	3324	2920	0.997808	3.69	0.056
DP166	285625	6344	27303	16530	0.987025	4.13	0.0647
DP167	233445	1148	4402	2594	0.997186	3.43	0.0832
DP168	763433	647	2488	1655	0.999518	2.12	0.1342
DP169	17670	600	7780	4792	0.976797	3.64	0.1057
DP170	18061	749	7693	4764	0.971043	3.74	0.1019
DP171	358078	5357	40760	19524	0.990469	5.54	0.0122
DP172	276882	1010	2079	1661	0.998396	2.87	0.1035
DP173	489566	3221	20255	11956	0.996013	2.57	0.1315
DP174	264670	914	1032	1024	0.99938	3.32	0.0921
DP175	450685	1337	4416	3074	0.998584	3.41	0.0658
DP176	416895	3672	34117	17873	0.993828	4.91	0.0116
DP177	549891	1057	3320	2962	0.998854	3	0.0807
DP178	385961	1194	1516	1445	0.999236	3.6	0.0784
DP179	414387	1207	1527	1596	0.999283	3.37	0.1071
DP180	203061	1727	5859	3690	0.995789	4.53	0.0256
DP181	371830	1798	17230	7238	0.996837	4.33	0.0336
DP182	452408	1761	24478	10241	0.997268	4.95	0.0093
DP183	19449	743	10949	3592	0.973366	3.62	0.1148
DP184	261996	1826	15049	6745	0.995599	4.94	0.0101
DP185	261632	1098	2310	1980	0.998337	4.06	0.0323
DP186	297984	4084	10483	8134	0.993634	5.17	0.0145
DP187	524051	1990	8845	5332	0.997733	2.27	0.2248
DP188	222282	1666	5279	3036	0.99623	4.93	0.016
DP189	362779	25442	34312	45704	0.976443	8.78	0.0005
DP190	459407	1612	16772	7511	0.997497	4.23	0.0267
DP191	380706	5281	37887	19338	0.991413	5.41	0.0128
DP192	211445	2454	8664	5966	0.994145	5.04	0.0218
DP193	408892	15401	40370	43717	0.982695	7.24	0.0047
DP194	444681	1672	11016	5972	0.997585	4.86	0.015
DP195	478941	1432	4746	3064	0.998453	2.01	0.2987
DP196	350456	1388	4250	4297	0.997957	3.96	0.0343
DP197	429815	3694	15446	10423	0.995442	5.35	0.0091
DP198	505322	6029	26920	20516	0.993697	5.45	0.0115
DP199	377698	1305	12972	7169	0.998054	4.81	0.0247
DP200	273505	2777	12609	9477	0.993909	5.15	0.0097
DP201	451091	3047	5731	4761	0.996528	2.4	0.1928
DP202	274513	2007	5398	3646	0.996714	4.25	0.0431
DP203	366615	2241	22104	11392	0.995791	5.1	0.0097
DP204	356860	2031	2996	2747	0.998459	4.14	0.0618
DP205	397626	4966	21945	16625	0.992991	5.12	0.0139
DP206	421427	1221	9282	4720	0.998235	4.7	0.0195
DP207	505887	1497	10542	6559	0.998144	3.36	0.0738
DP208	108371	1229	17899	8598	0.991612	3.95	0.033
DP209	582650	3942	11846	8577	0.996921	2.77	0.2207
DP210	436713	2880	8021	5653	0.99706	4.31	0.0828
DP211	255880	2100	4384	4221	0.996444	4.46	0.0376
DP212	487768	7566	82679	38017	0.988972	5.47	0.0085
DP213	278375	1573	3001	2542	0.998161	4.76	0.0234
DP214	319404	1919	3814	2934	0.997386	4.01	0.054
DP215	416877	1334	4193	2910	0.998518	4.07	0.0525
DP216	450988	1317	11643	5426	0.998071	4.77	0.0156
DP217	197277	1406	4442	2853	0.996259	3.88	0.0419
DP218	406178	3689	6334	5112	0.997095	5.11	0.0223
DP219	464688	1442	22926	9092	0.99782	4.98	0.0092
DP220	335499	3210	21537	13412	0.993669	5.2	0.0083
DP221	296387	3090	5036	4550	0.996845	5.37	0.0243
DP222	430769	1768	10327	6321	0.997751	4.68	0.0258
DP223	722629	629	794	767	0.999794	1.58	0.42
DP224	489199	2594	16581	10629	0.996552	4.62	0.0189
DP225	321063	1182	53993	17752	0.996692	3.46	0.0349
DP226	362167	2150	4766	3340	0.997393	3.72	0.0501
DP227	601595	3141	17019	10509	0.997061	4.1	0.036
* All diversity index was calculated at a threshold of 0.97.
