# Supplementary material for: Environmental viromes reveal global virosphere of deep-sea RNA viruses
Source: Research Square preprint supplement (doi:10.21203/rs.3.rs-1294962/v1), 2022-02-10
Supplement: Supplementary file 7 [file f1cad871e9a33ebf867e3053.xlsx]

## Sheet: Sheet1
Table S5. The core viral operational taxonomic units (vOTUs) in Atlantic Ocean, Indian Ocean and Pacific Ocean.
vOTU	Sequence number in metagenomic dataset*
vOTU-84968	DP227__987
vOTU-84965	DP227__905
vOTU-84964	DP227__860
vOTU-84963	DP227__777
vOTU-84939	DP227__73
vOTU-84961	DP227__706
vOTU-84937	DP227__70
vOTU-84936	DP227__67
vOTU-84960	DP227__667
vOTU-84957	DP227__557
vOTU-84955	DP227__487
vOTU-84934	DP227__45
vOTU-85058	DP227__3630
vOTU-85057	DP227__3626
vOTU-84950	DP227__352
vOTU-85052	DP227__3489
vOTU-85049	DP227__3381
vOTU-85047	DP227__3274
vOTU-85043	DP227__3035
vOTU-85038	DP227__2991
vOTU-85037	DP227__2949
vOTU-84948	DP227__292
vOTU-85034	DP227__2849
vOTU-85030	DP227__2750
vOTU-85026	DP227__2429
vOTU-85024	DP227__2363
vOTU-85022	DP227__2344
vOTU-85011	DP227__1820
vOTU-85009	DP227__1807
vOTU-85001	DP227__1606
vOTU-84997	DP227__1572
vOTU-84941	DP227__155
vOTU-84992	DP227__1501
vOTU-84989	DP227__1443
vOTU-84982	DP227__1334
vOTU-84981	DP227__1300
vOTU-84933	DP227__13
vOTU-84974	DP227__1127
vOTU-84973	DP227__1121
vOTU-84972	DP227__1103
vOTU-84969	DP227__1025
vOTU-84868	DP226__943
vOTU-84849	DP226__495
vOTU-84843	DP226__351
vOTU-84927	DP226__2998
vOTU-84841	DP226__292
vOTU-84896	DP226__1863
vOTU-84893	DP226__1820
vOTU-84889	DP226__1790
vOTU-84880	DP226__1374
vOTU-84876	DP226__1216
vOTU-84875	DP226__1199
vOTU-84870	DP226__1035
vOTU-84823	DP225__983
vOTU-84822	DP225__980
vOTU-84821	DP225__970
vOTU-84819	DP225__869
vOTU-84818	DP225__837
vOTU-84816	DP225__715
vOTU-84806	DP225__71
vOTU-84815	DP225__651
vOTU-84814	DP225__603
vOTU-84811	DP225__395
vOTU-84810	DP225__309
vOTU-84809	DP225__308
vOTU-84805	DP225__23
vOTU-84829	DP225__1442
vOTU-84828	DP225__1298
vOTU-84827	DP225__1262
vOTU-84826	DP225__1240
vOTU-84808	DP225__116
vOTU-84825	DP225__1098
vOTU-84361	DP224__574
vOTU-84358	DP224__549
vOTU-84345	DP224__481
vOTU-84341	DP224__446
vOTU-84797	DP224__3520
vOTU-84794	DP224__3504
vOTU-84792	DP224__3494
vOTU-84791	DP224__3485
vOTU-84774	DP224__3378
vOTU-84760	DP224__3279
vOTU-84755	DP224__3240
vOTU-84741	DP224__3139
vOTU-84277	DP224__31
vOTU-84713	DP224__2948
vOTU-84700	DP224__2855
vOTU-84610	DP224__2217
vOTU-84585	DP224__2036
vOTU-84441	DP224__1164
vOTU-84420	DP224__1033
vOTU-84218	DP223__615
vOTU-84264	DP223__1482
vOTU-84261	DP223__1442
vOTU-84247	DP223__1208
vOTU-84142	DP222__991
vOTU-84140	DP222__957
vOTU-84136	DP222__843
vOTU-84104	DP222__8
vOTU-84133	DP222__737
vOTU-84131	DP222__705
vOTU-84127	DP222__577
vOTU-84125	DP222__550
vOTU-84124	DP222__518
vOTU-84123	DP222__497
vOTU-84122	DP222__494
vOTU-84114	DP222__255
vOTU-84192	DP222__2394
vOTU-84191	DP222__2372
vOTU-84189	DP222__2341
vOTU-84185	DP222__2209
vOTU-84183	DP222__2148
vOTU-84182	DP222__2109
vOTU-84181	DP222__2103
vOTU-84179	DP222__2076
vOTU-84112	DP222__207
vOTU-84176	DP222__2031
vOTU-84174	DP222__1979
vOTU-84169	DP222__1884
vOTU-84111	DP222__181
vOTU-84166	DP222__1786
vOTU-84110	DP222__172
vOTU-84161	DP222__1586
vOTU-84153	DP222__1323
vOTU-84151	DP222__1304
vOTU-84107	DP222__118
vOTU-84146	DP222__1161
vOTU-84106	DP222__116
vOTU-83835	DP221__975
vOTU-83831	DP221__943
vOTU-83828	DP221__826
vOTU-84102	DP221__6622
vOTU-84084	DP221__6189
vOTU-84081	DP221__6142
vOTU-84080	DP221__6137
vOTU-84075	DP221__6025
vOTU-84074	DP221__5987
vOTU-84073	DP221__5959
vOTU-84061	DP221__5616
vOTU-84059	DP221__5594
vOTU-84055	DP221__5516
vOTU-84053	DP221__5513
vOTU-84048	DP221__5481
vOTU-84042	DP221__5369
vOTU-84041	DP221__5368
vOTU-84033	DP221__5216
vOTU-84031	DP221__5205
vOTU-84027	DP221__5118
vOTU-84014	DP221__4858
vOTU-84013	DP221__4842
vOTU-84008	DP221__4741
vOTU-84007	DP221__4726
vOTU-84002	DP221__4626
vOTU-84001	DP221__4584
vOTU-83807	DP221__445
vOTU-83994	DP221__4426
vOTU-83990	DP221__4317
vOTU-83988	DP221__4283
vOTU-83985	DP221__4208
vOTU-83984	DP221__4200
vOTU-83979	DP221__4114
vOTU-83974	DP221__4045
vOTU-83968	DP221__3896
vOTU-83959	DP221__3779
vOTU-83955	DP221__3677
vOTU-83953	DP221__3669
vOTU-83802	DP221__342
vOTU-83941	DP221__3363
vOTU-83936	DP221__3247
vOTU-83934	DP221__3241
vOTU-83931	DP221__3175
vOTU-83930	DP221__3115
vOTU-83912	DP221__2701
vOTU-83909	DP221__2571
vOTU-83904	DP221__2417
vOTU-83900	DP221__2319
vOTU-83888	DP221__2083
vOTU-83799	DP221__207
vOTU-83879	DP221__1890
vOTU-83878	DP221__1875
vOTU-83871	DP221__1767
vOTU-83870	DP221__1757
vOTU-83864	DP221__1636
vOTU-83854	DP221__1444
vOTU-83846	DP221__1137
vOTU-83843	DP221__1093
vOTU-83566	DP220__994
vOTU-83550	DP220__828
vOTU-83534	DP220__560
vOTU-83501	DP220__55
vOTU-83526	DP220__484
vOTU-83773	DP220__4012
vOTU-83765	DP220__3929
vOTU-83760	DP220__3869
vOTU-83745	DP220__3675
vOTU-83730	DP220__3464
vOTU-83724	DP220__3380
vOTU-83717	DP220__3294
vOTU-83715	DP220__3251
vOTU-83691	DP220__2936
vOTU-83667	DP220__2659
vOTU-83657	DP220__2507
vOTU-83645	DP220__2286
vOTU-83640	DP220__2212
vOTU-83629	DP220__1944
vOTU-83626	DP220__1891
vOTU-83622	DP220__1859
vOTU-83615	DP220__1680
vOTU-83610	DP220__1614
vOTU-83594	DP220__1411
vOTU-83593	DP220__1406
vOTU-83570	DP220__1050
vOTU-83567	DP220__1001
vOTU-83481	DP219__987
vOTU-83479	DP219__934
vOTU-83478	DP219__867
vOTU-83477	DP219__857
vOTU-83476	DP219__854
vOTU-83451	DP219__85
vOTU-83450	DP219__83
vOTU-83472	DP219__750
vOTU-83470	DP219__727
vOTU-83468	DP219__672
vOTU-83467	DP219__630
vOTU-83466	DP219__610
vOTU-83465	DP219__606
vOTU-83461	DP219__458
vOTU-83460	DP219__423
vOTU-83459	DP219__414
vOTU-83456	DP219__278
vOTU-83455	DP219__167
vOTU-83454	DP219__140
vOTU-83498	DP219__1385
vOTU-83493	DP219__1295
vOTU-83492	DP219__1255
vOTU-83453	DP219__124
vOTU-83491	DP219__1234
vOTU-83490	DP219__1218
vOTU-83489	DP219__1213
vOTU-83488	DP219__1183
vOTU-83487	DP219__1178
vOTU-83062	DP218__990
vOTU-83061	DP218__961
vOTU-83047	DP218__820
vOTU-83027	DP218__699
vOTU-83018	DP218__642
vOTU-83012	DP218__600
vOTU-83006	DP218__566
vOTU-83446	DP218__3593
vOTU-83440	DP218__3540
vOTU-82977	DP218__343
vOTU-83418	DP218__3415
vOTU-83415	DP218__3391
vOTU-83407	DP218__3302
vOTU-83404	DP218__3259
vOTU-83376	DP218__3049
vOTU-83374	DP218__3017
vOTU-83364	DP218__2939
vOTU-83356	DP218__2900
vOTU-83346	DP218__2819
vOTU-83338	DP218__2747
vOTU-83322	DP218__2639
vOTU-82966	DP218__254
vOTU-83266	DP218__2348
vOTU-83265	DP218__2341
vOTU-83253	DP218__2223
vOTU-83251	DP218__2192
vOTU-83227	DP218__2071
vOTU-83222	DP218__2043
vOTU-83209	DP218__1940
vOTU-83162	DP218__1611
vOTU-83155	DP218__1577
vOTU-83154	DP218__1572
vOTU-83142	DP218__1503
vOTU-83130	DP218__1461
vOTU-83129	DP218__1444
vOTU-83119	DP218__1385
vOTU-83118	DP218__1380
vOTU-83092	DP218__1231
vOTU-83079	DP218__1104
vOTU-83076	DP218__1058
vOTU-82946	DP218__103
vOTU-83066	DP218__1013
vOTU-82889	DP217__574
vOTU-82886	DP217__546
vOTU-82884	DP217__463
vOTU-82882	DP217__382
vOTU-82925	DP217__3787
vOTU-82924	DP217__3588
vOTU-82922	DP217__3419
vOTU-82881	DP217__340
vOTU-82921	DP217__3340
vOTU-82920	DP217__3305
vOTU-82880	DP217__305
vOTU-82918	DP217__2841
vOTU-82879	DP217__276
vOTU-82917	DP217__2733
vOTU-82916	DP217__2727
vOTU-82915	DP217__2718
vOTU-82913	DP217__2523
vOTU-82912	DP217__2493
vOTU-82877	DP217__227
vOTU-82911	DP217__2208
vOTU-82907	DP217__2122
vOTU-82876	DP217__205
vOTU-82875	DP217__180
vOTU-82904	DP217__1780
vOTU-82903	DP217__1765
vOTU-82899	DP217__1697
vOTU-82896	DP217__1446
vOTU-82895	DP217__1394
vOTU-82893	DP217__1241
vOTU-82892	DP217__1193
vOTU-82836	DP216__851
vOTU-82834	DP216__810
vOTU-82833	DP216__764
vOTU-82832	DP216__699
vOTU-82831	DP216__695
vOTU-82829	DP216__567
vOTU-82828	DP216__554
vOTU-82827	DP216__539
vOTU-82821	DP216__324
vOTU-82865	DP216__1622
vOTU-82864	DP216__1620
vOTU-82863	DP216__1599
vOTU-82862	DP216__1594
vOTU-82861	DP216__1569
vOTU-82858	DP216__1453
vOTU-82857	DP216__1404
vOTU-82855	DP216__1330
vOTU-82854	DP216__1326
vOTU-82852	DP216__1290
vOTU-82849	DP216__1238
vOTU-82848	DP216__1236
vOTU-82844	DP216__1130
vOTU-82813	DP216__106
vOTU-82840	DP216__1057
vOTU-82839	DP216__1029
vOTU-82838	DP216__1021
vOTU-82837	DP216__1012
vOTU-82775	DP215__855
vOTU-82770	DP215__670
vOTU-82769	DP215__641
vOTU-82768	DP215__592
vOTU-82766	DP215__416
vOTU-82810	DP215__3682
vOTU-82809	DP215__3596
vOTU-82807	DP215__3458
vOTU-82804	DP215__3234
vOTU-82803	DP215__2932
vOTU-82763	DP215__278
vOTU-82799	DP215__2476
vOTU-82794	DP215__2160
vOTU-82793	DP215__2103
vOTU-82792	DP215__2049
vOTU-82762	DP215__196
vOTU-82761	DP215__174
vOTU-82789	DP215__1739
vOTU-82788	DP215__1711
vOTU-82786	DP215__1635
vOTU-82760	DP215__163
vOTU-82785	DP215__1624
vOTU-82784	DP215__1586
vOTU-82759	DP215__147
vOTU-82781	DP215__1369
vOTU-82780	DP215__1288
vOTU-82779	DP215__1205
vOTU-82778	DP215__1102
vOTU-82777	DP215__1024
vOTU-82758	DP215__101
vOTU-82742	DP214__824
vOTU-82741	DP214__786
vOTU-82740	DP214__755
vOTU-82739	DP214__722
vOTU-82738	DP214__715
vOTU-82719	DP214__6
vOTU-82721	DP214__56
vOTU-82730	DP214__428
vOTU-82729	DP214__386
vOTU-82728	DP214__369
vOTU-82757	DP214__1531
vOTU-82756	DP214__1467
vOTU-82755	DP214__1418
vOTU-82752	DP214__1312
vOTU-82751	DP214__1244
vOTU-82750	DP214__1188
vOTU-82748	DP214__1133
vOTU-82745	DP214__1051
vOTU-82743	DP214__1032
vOTU-82646	DP213__956
vOTU-82645	DP213__936
vOTU-82638	DP213__405
vOTU-82718	DP213__3209
vOTU-82713	DP213__3120
vOTU-82712	DP213__3094
vOTU-82708	DP213__2930
vOTU-82707	DP213__2913
vOTU-82703	DP213__2781
vOTU-82700	DP213__2630
vOTU-82699	DP213__2629
vOTU-82698	DP213__2573
vOTU-82697	DP213__2554
vOTU-82696	DP213__2526
vOTU-82694	DP213__2511
vOTU-82692	DP213__2392
vOTU-82689	DP213__2338
vOTU-82687	DP213__2299
vOTU-82685	DP213__2185
vOTU-82684	DP213__2169
vOTU-82678	DP213__2016
vOTU-82677	DP213__2007
vOTU-82676	DP213__1993
vOTU-82669	DP213__1883
vOTU-82667	DP213__1704
vOTU-82665	DP213__1663
vOTU-82664	DP213__1544
vOTU-82662	DP213__1489
vOTU-82661	DP213__1476
vOTU-82660	DP213__1473
vOTU-82657	DP213__1444
vOTU-82656	DP213__1419
vOTU-82653	DP213__1245
vOTU-82652	DP213__1243
vOTU-82649	DP213__1049
vOTU-82648	DP213__1043
vOTU-82077	DP212__975
vOTU-82039	DP212__705
vOTU-82023	DP212__632
vOTU-82007	DP212__531
vOTU-82000	DP212__449
vOTU-82606	DP212__4427
vOTU-82593	DP212__4336
vOTU-82592	DP212__4329
vOTU-82580	DP212__4254
vOTU-82571	DP212__4208
vOTU-82557	DP212__4115
vOTU-82508	DP212__3738
vOTU-81989	DP212__367
vOTU-82481	DP212__3590
vOTU-82474	DP212__3547
vOTU-82458	DP212__3410
vOTU-82439	DP212__3271
vOTU-82424	DP212__3189
vOTU-82371	DP212__2854
vOTU-82357	DP212__2793
vOTU-82355	DP212__2783
vOTU-82353	DP212__2771
vOTU-82343	DP212__2714
vOTU-82292	DP212__2403
vOTU-82251	DP212__2110
vOTU-82234	DP212__1980
vOTU-82224	DP212__1882
vOTU-82199	DP212__1720
vOTU-82191	DP212__1697
vOTU-81964	DP212__163
vOTU-82177	DP212__1605
vOTU-82164	DP212__1529
vOTU-82093	DP212__1048
vOTU-81799	DP211__763
vOTU-81783	DP211__421
vOTU-81945	DP211__3594
vOTU-81942	DP211__3553
vOTU-81777	DP211__350
vOTU-81941	DP211__3480
vOTU-81775	DP211__343
vOTU-81774	DP211__336
vOTU-81912	DP211__2846
vOTU-81771	DP211__278
vOTU-81901	DP211__2586
vOTU-81896	DP211__2476
vOTU-81871	DP211__2118
vOTU-81769	DP211__192
vOTU-81860	DP211__1900
vOTU-81767	DP211__188
vOTU-81857	DP211__1865
vOTU-81853	DP211__1765
vOTU-81848	DP211__1728
vOTU-81834	DP211__1404
vOTU-81764	DP211__136
vOTU-81826	DP211__1312
vOTU-81750	DP210__7876
vOTU-81248	DP210__786
vOTU-81714	DP210__7380
vOTU-81691	DP210__6959
vOTU-81242	DP210__693
vOTU-81238	DP210__630
vOTU-81233	DP210__588
vOTU-81612	DP210__5839
vOTU-81536	DP210__5058
vOTU-81484	DP210__4229
vOTU-81397	DP210__3025
vOTU-81379	DP210__2726
vOTU-81355	DP210__2453
vOTU-81287	DP210__1371
vOTU-81158	DP209__9579
vOTU-81157	DP209__9533
vOTU-81149	DP209__9475
vOTU-81147	DP209__9439
vOTU-80583	DP209__916
vOTU-81129	DP209__9117
vOTU-81084	DP209__8325
vOTU-81062	DP209__7949
vOTU-81050	DP209__7774
vOTU-81047	DP209__7724
vOTU-81045	DP209__7690
vOTU-81007	DP209__7248
vOTU-80997	DP209__7119
vOTU-80987	DP209__7046
vOTU-80973	DP209__6812
vOTU-80966	DP209__6748
vOTU-80958	DP209__6598
vOTU-80954	DP209__6538
vOTU-80944	DP209__6408
vOTU-80923	DP209__6036
vOTU-80922	DP209__6017
vOTU-80918	DP209__5998
vOTU-80907	DP209__5823
vOTU-80882	DP209__5447
vOTU-80876	DP209__5356
vOTU-80843	DP209__4931
vOTU-80833	DP209__4862
vOTU-80829	DP209__4791
vOTU-80809	DP209__4548
vOTU-80550	DP209__323
vOTU-80741	DP209__3160
vOTU-80737	DP209__3093
vOTU-80728	DP209__2930
vOTU-80695	DP209__2380
vOTU-80677	DP209__2153
vOTU-80674	DP209__2121
vOTU-80658	DP209__1896
vOTU-80653	DP209__1857
vOTU-80652	DP209__1841
vOTU-80648	DP209__1744
vOTU-80625	DP209__1417
vOTU-80604	DP209__1120
vOTU-80596	DP209__1030
vOTU-81191	DP209__10051
vOTU-80490	DP208__96
vOTU-80494	DP208__404
vOTU-80525	DP208__3988
vOTU-80524	DP208__3893
vOTU-80492	DP208__372
vOTU-80516	DP208__2785
vOTU-80513	DP208__2591
vOTU-80511	DP208__2415
vOTU-80509	DP208__2038
vOTU-80507	DP208__1787
vOTU-80503	DP208__1663
vOTU-80500	DP208__1304
vOTU-80498	DP208__1017
vOTU-80455	DP207__893
vOTU-80451	DP207__851
vOTU-80450	DP207__748
vOTU-80412	DP207__73
vOTU-80448	DP207__714
vOTU-80447	DP207__704
vOTU-80445	DP207__686
vOTU-80444	DP207__631
vOTU-80442	DP207__602
vOTU-80441	DP207__581
vOTU-80437	DP207__505
vOTU-80435	DP207__491
vOTU-80434	DP207__468
vOTU-80431	DP207__409
vOTU-80426	DP207__307
vOTU-80425	DP207__296
vOTU-80424	DP207__293
vOTU-80423	DP207__268
vOTU-80487	DP207__1688
vOTU-80484	DP207__1529
vOTU-80482	DP207__1513
vOTU-80481	DP207__1512
vOTU-80480	DP207__1501
vOTU-80479	DP207__1490
vOTU-80478	DP207__1444
vOTU-80477	DP207__1442
vOTU-80473	DP207__1381
vOTU-80416	DP207__138
vOTU-80465	DP207__1160
vOTU-80459	DP207__1009
vOTU-80383	DP206__938
vOTU-80381	DP206__896
vOTU-80379	DP206__841
vOTU-80377	DP206__730
vOTU-80375	DP206__653
vOTU-80374	DP206__647
vOTU-80373	DP206__629
vOTU-80371	DP206__579
vOTU-80367	DP206__384
vOTU-80355	DP206__36
vOTU-80364	DP206__291
vOTU-80362	DP206__281
vOTU-80361	DP206__203
vOTU-80409	DP206__1800
vOTU-80407	DP206__1780
vOTU-80406	DP206__1760
vOTU-80405	DP206__1748
vOTU-80359	DP206__174
vOTU-80404	DP206__1716
vOTU-80403	DP206__1704
vOTU-80358	DP206__167
vOTU-80399	DP206__1644
vOTU-80398	DP206__1588
vOTU-80396	DP206__1501
vOTU-80394	DP206__1373
vOTU-80354	DP206__12
vOTU-80391	DP206__1181
vOTU-80388	DP206__1123
vOTU-80386	DP206__1058
vOTU-79406	DP205__998
vOTU-79404	DP205__983
vOTU-79345	DP205__706
vOTU-79342	DP205__689
vOTU-79198	DP205__67
vOTU-80328	DP205__5475
vOTU-80254	DP205__5134
vOTU-80210	DP205__4886
vOTU-80208	DP205__4879
vOTU-80174	DP205__4720
vOTU-79288	DP205__458
vOTU-79279	DP205__434
vOTU-79988	DP205__3795
vOTU-79972	DP205__3735
vOTU-79948	DP205__3584
vOTU-79944	DP205__3570
vOTU-79933	DP205__3524
vOTU-79927	DP205__3498
vOTU-79896	DP205__3386
vOTU-79876	DP205__3313
vOTU-79257	DP205__320
vOTU-79837	DP205__3103
vOTU-79829	DP205__3059
vOTU-79817	DP205__3020
vOTU-79807	DP205__2986
vOTU-79791	DP205__2882
vOTU-79251	DP205__288
vOTU-79790	DP205__2876
vOTU-79765	DP205__2788
vOTU-79723	DP205__2601
vOTU-79715	DP205__2551
vOTU-79709	DP205__2505
vOTU-79707	DP205__2500
vOTU-79685	DP205__2363
vOTU-79680	DP205__2354
vOTU-79669	DP205__2295
vOTU-79657	DP205__2194
vOTU-79639	DP205__2103
vOTU-79233	DP205__196
vOTU-79574	DP205__1806
vOTU-79553	DP205__1692
vOTU-79506	DP205__1490
vOTU-79489	DP205__1375
vOTU-79465	DP205__1278
vOTU-79441	DP205__1165
vOTU-79172	DP204__998
vOTU-79171	DP204__981
vOTU-79170	DP204__980
vOTU-79169	DP204__974
vOTU-79166	DP204__888
vOTU-79165	DP204__861
vOTU-79164	DP204__846
vOTU-79163	DP204__834
vOTU-79134	DP204__83
vOTU-79162	DP204__812
vOTU-79161	DP204__737
vOTU-79160	DP204__735
vOTU-79159	DP204__734
vOTU-79158	DP204__729
vOTU-79155	DP204__705
vOTU-79154	DP204__695
vOTU-79151	DP204__658
vOTU-79150	DP204__612
vOTU-79149	DP204__580
vOTU-79148	DP204__481
vOTU-79133	DP204__46
vOTU-79147	DP204__455
vOTU-79146	DP204__446
vOTU-79143	DP204__275
vOTU-79142	DP204__250
vOTU-79140	DP204__237
vOTU-79139	DP204__193
vOTU-79138	DP204__183
vOTU-79136	DP204__155
vOTU-79184	DP204__1359
vOTU-79182	DP204__1291
vOTU-79181	DP204__1224
vOTU-79179	DP204__1128
vOTU-79177	DP204__1120
vOTU-79135	DP204__100
vOTU-79132	DP204__10
vOTU-78984	DP203__999
vOTU-78981	DP203__983
vOTU-78977	DP203__929
vOTU-78963	DP203__832
vOTU-78945	DP203__633
vOTU-78918	DP203__336
vOTU-79131	DP203__2386
vOTU-79118	DP203__2297
vOTU-79110	DP203__2191
vOTU-79104	DP203__2139
vOTU-79089	DP203__1967
vOTU-79054	DP203__1623
vOTU-78902	DP203__132
vOTU-79015	DP203__1275
vOTU-78991	DP203__1061
vOTU-78990	DP203__1052
vOTU-78751	DP202__996
vOTU-78750	DP202__995
vOTU-78693	DP202__87
vOTU-78692	DP202__83
vOTU-78744	DP202__825
vOTU-78743	DP202__808
vOTU-78691	DP202__80
vOTU-78740	DP202__795
vOTU-78739	DP202__773
vOTU-78737	DP202__767
vOTU-78730	DP202__694
vOTU-78729	DP202__637
vOTU-78690	DP202__62
vOTU-78727	DP202__589
vOTU-78726	DP202__570
vOTU-78723	DP202__530
vOTU-78715	DP202__476
vOTU-78710	DP202__418
vOTU-78708	DP202__414
vOTU-78704	DP202__334
vOTU-78703	DP202__305
vOTU-78884	DP202__2611
vOTU-78882	DP202__2599
vOTU-78880	DP202__2552
vOTU-78879	DP202__2532
vOTU-78878	DP202__2521
vOTU-78877	DP202__2505
vOTU-78875	DP202__2475
vOTU-78871	DP202__2431
vOTU-78870	DP202__2420
vOTU-78869	DP202__2419
vOTU-78868	DP202__2409
vOTU-78687	DP202__24
vOTU-78864	DP202__2351
vOTU-78860	DP202__2316
vOTU-78859	DP202__2303
vOTU-78699	DP202__229
vOTU-78857	DP202__2260
vOTU-78855	DP202__2240
vOTU-78854	DP202__2228
vOTU-78853	DP202__2220
vOTU-78850	DP202__2190
vOTU-78849	DP202__2148
vOTU-78847	DP202__2128
vOTU-78845	DP202__2104
vOTU-78844	DP202__2052
vOTU-78841	DP202__2017
vOTU-78840	DP202__2012
vOTU-78838	DP202__1982
vOTU-78836	DP202__1911
vOTU-78835	DP202__1897
vOTU-78831	DP202__1835
vOTU-78830	DP202__1819
vOTU-78827	DP202__1810
vOTU-78686	DP202__18
vOTU-78825	DP202__1770
vOTU-78824	DP202__1767
vOTU-78816	DP202__1699
vOTU-78815	DP202__1693
vOTU-78808	DP202__1618
vOTU-78807	DP202__1611
vOTU-78805	DP202__1589
vOTU-78802	DP202__1549
vOTU-78799	DP202__1489
vOTU-78798	DP202__1483
vOTU-78791	DP202__1448
vOTU-78789	DP202__1410
vOTU-78786	DP202__1375
vOTU-78779	DP202__1288
vOTU-78778	DP202__1281
vOTU-78776	DP202__1222
vOTU-78695	DP202__122
vOTU-78772	DP202__1206
vOTU-78694	DP202__119
vOTU-78771	DP202__1185
vOTU-78770	DP202__1173
vOTU-78768	DP202__1159
vOTU-78766	DP202__1131
vOTU-78765	DP202__1122
vOTU-78763	DP202__1100
vOTU-78762	DP202__1098
vOTU-78761	DP202__1092
vOTU-78760	DP202__1078
vOTU-78759	DP202__1065
vOTU-78757	DP202__1060
vOTU-78756	DP202__1042
vOTU-78685	DP202__10
vOTU-78504	DP201__936
vOTU-78491	DP201__814
vOTU-78486	DP201__787
vOTU-78680	DP201__2807
vOTU-78437	DP201__278
vOTU-78656	DP201__2619
vOTU-78428	DP201__219
vOTU-78599	DP201__2000
vOTU-78037	DP200__826
vOTU-78031	DP200__792
vOTU-78024	DP200__732
vOTU-78010	DP200__661
vOTU-77988	DP200__481
vOTU-78397	DP200__3645
vOTU-78395	DP200__3620
vOTU-78340	DP200__3202
vOTU-78317	DP200__3003
vOTU-78293	DP200__2840
vOTU-78280	DP200__2749
vOTU-78244	DP200__2363
vOTU-78243	DP200__2359
vOTU-78233	DP200__2276
vOTU-77962	DP200__227
vOTU-78231	DP200__2261
vOTU-78227	DP200__2222
vOTU-78202	DP200__2007
vOTU-78198	DP200__1966
vOTU-78192	DP200__1939
vOTU-77953	DP200__191
vOTU-77952	DP200__187
vOTU-78171	DP200__1733
vOTU-78076	DP200__1140
vOTU-78073	DP200__1121
vOTU-77926	DP199__991
vOTU-77924	DP199__935
vOTU-77894	DP199__9
vOTU-77923	DP199__888
vOTU-77922	DP199__861
vOTU-77921	DP199__841
vOTU-77897	DP199__83
vOTU-77920	DP199__757
vOTU-77918	DP199__691
vOTU-77917	DP199__680
vOTU-77916	DP199__676
vOTU-77915	DP199__646
vOTU-77914	DP199__616
vOTU-77912	DP199__573
vOTU-77908	DP199__475
vOTU-77907	DP199__446
vOTU-77906	DP199__414
vOTU-77905	DP199__338
vOTU-77902	DP199__252
vOTU-77901	DP199__234
vOTU-77895	DP199__18
vOTU-77900	DP199__171
vOTU-77938	DP199__1333
vOTU-77936	DP199__1274
vOTU-77934	DP199__1215
vOTU-77933	DP199__1169
vOTU-77899	DP199__115
vOTU-77932	DP199__1115
vOTU-77931	DP199__1093
vOTU-77929	DP199__1063
vOTU-77927	DP199__1022
vOTU-77893	DP199__1
vOTU-77236	DP198__936
vOTU-77231	DP198__898
vOTU-77223	DP198__787
vOTU-77892	DP198__7781
vOTU-77884	DP198__7739
vOTU-77878	DP198__7666
vOTU-77864	DP198__7543
vOTU-77819	DP198__7165
vOTU-77787	DP198__6776
vOTU-77785	DP198__6743
vOTU-77775	DP198__6634
vOTU-77731	DP198__6333
vOTU-77715	DP198__6191
vOTU-77708	DP198__6112
vOTU-77692	DP198__5908
vOTU-77636	DP198__5452
vOTU-77623	DP198__5302
vOTU-77610	DP198__5191
vOTU-77209	DP198__516
vOTU-77598	DP198__5069
vOTU-77207	DP198__503
vOTU-77594	DP198__5022
vOTU-77592	DP198__5015
vOTU-77582	DP198__4836
vOTU-77570	DP198__4720
vOTU-77561	DP198__4659
vOTU-77559	DP198__4642
vOTU-77537	DP198__4355
vOTU-77153	DP198__42
vOTU-77189	DP198__408
vOTU-77517	DP198__4073
vOTU-77497	DP198__3811
vOTU-77489	DP198__3745
vOTU-77485	DP198__3696
vOTU-77482	DP198__3669
vOTU-77479	DP198__3639
vOTU-77438	DP198__3136
vOTU-77169	DP198__206
vOTU-77303	DP198__1773
vOTU-77296	DP198__1722
vOTU-77284	DP198__1526
vOTU-77280	DP198__1484
vOTU-77157	DP198__137
vOTU-76497	DP197__676
vOTU-77147	DP197__4974
vOTU-77098	DP197__4621
vOTU-77030	DP197__4118
vOTU-76996	DP197__3925
vOTU-76993	DP197__3921
vOTU-76986	DP197__3877
vOTU-76967	DP197__3753
vOTU-76950	DP197__3604
vOTU-76859	DP197__3051
vOTU-76387	DP197__3
vOTU-76823	DP197__2839
vOTU-76809	DP197__2717
vOTU-76790	DP197__2598
vOTU-76768	DP197__2420
vOTU-76704	DP197__2030
vOTU-76695	DP197__1998
vOTU-76658	DP197__1784
vOTU-76644	DP197__1701
vOTU-76634	DP197__1631
vOTU-76628	DP197__1594
vOTU-76594	DP197__1333
vOTU-76581	DP197__1244
vOTU-76347	DP196__894
vOTU-76346	DP196__861
vOTU-76345	DP196__855
vOTU-76342	DP196__660
vOTU-76340	DP196__623
vOTU-76339	DP196__619
vOTU-76338	DP196__552
vOTU-76334	DP196__349
vOTU-76333	DP196__348
vOTU-76332	DP196__329
vOTU-76321	DP196__32
vOTU-76331	DP196__310
vOTU-76330	DP196__307
vOTU-76328	DP196__299
vOTU-76326	DP196__212
vOTU-76385	DP196__2104
vOTU-76382	DP196__2042
vOTU-76381	DP196__1991
vOTU-76320	DP196__19
vOTU-76377	DP196__1866
vOTU-76375	DP196__1831
vOTU-76374	DP196__1824
vOTU-76373	DP196__1743
vOTU-76370	DP196__1606
vOTU-76324	DP196__160
vOTU-76369	DP196__1565
vOTU-76368	DP196__1555
vOTU-76367	DP196__1548
vOTU-76365	DP196__1457
vOTU-76364	DP196__1431
vOTU-76362	DP196__1370
vOTU-76361	DP196__1367
vOTU-76358	DP196__1289
vOTU-76323	DP196__128
vOTU-76356	DP196__1177
vOTU-76355	DP196__1149
vOTU-76354	DP196__1141
vOTU-76353	DP196__1111
vOTU-76297	DP195__993
vOTU-76294	DP195__938
vOTU-76292	DP195__853
vOTU-76291	DP195__770
vOTU-76290	DP195__761
vOTU-76287	DP195__739
vOTU-76286	DP195__720
vOTU-76283	DP195__687
vOTU-76282	DP195__610
vOTU-76281	DP195__602
vOTU-76278	DP195__533
vOTU-76259	DP195__50
vOTU-76274	DP195__476
vOTU-76317	DP195__1537
vOTU-76264	DP195__152
vOTU-76315	DP195__1518
vOTU-76314	DP195__1516
vOTU-76311	DP195__1425
vOTU-76310	DP195__1419
vOTU-76309	DP195__1387
vOTU-76307	DP195__1284
vOTU-76305	DP195__1217
vOTU-76304	DP195__1180
vOTU-76302	DP195__1168
vOTU-76301	DP195__1164
vOTU-76299	DP195__1145
vOTU-76298	DP195__1139
vOTU-76217	DP194__970
vOTU-76214	DP194__859
vOTU-76213	DP194__837
vOTU-76211	DP194__824
vOTU-76210	DP194__768
vOTU-76206	DP194__692
vOTU-76183	DP194__69
vOTU-76204	DP194__664
vOTU-76203	DP194__650
vOTU-76199	DP194__543
vOTU-76198	DP194__542
vOTU-76197	DP194__492
vOTU-76196	DP194__396
vOTU-76191	DP194__226
vOTU-76257	DP194__1893
vOTU-76256	DP194__1866
vOTU-76255	DP194__1855
vOTU-76248	DP194__1791
vOTU-76247	DP194__1777
vOTU-76239	DP194__1582
vOTU-76236	DP194__1510
vOTU-76235	DP194__1507
vOTU-76234	DP194__1468
vOTU-76233	DP194__1456
vOTU-76187	DP194__145
vOTU-76231	DP194__1371
vOTU-76230	DP194__1302
vOTU-76229	DP194__1266
vOTU-76227	DP194__1209
vOTU-76225	DP194__1164
vOTU-76224	DP194__1156
vOTU-76222	DP194__1070
vOTU-76218	DP194__1002
vOTU-72269	DP193__9238
vOTU-70503	DP193__915
vOTU-72197	DP193__8902
vOTU-72183	DP193__8815
vOTU-72161	DP193__8729
vOTU-70340	DP193__87
vOTU-72140	DP193__8644
vOTU-72134	DP193__8612
vOTU-72097	DP193__8447
vOTU-72046	DP193__8198
vOTU-72021	DP193__8075
vOTU-71999	DP193__7979
vOTU-71921	DP193__7632
vOTU-70476	DP193__759
vOTU-71824	DP193__7182
vOTU-71786	DP193__7014
vOTU-71760	DP193__6887
vOTU-71680	DP193__6492
vOTU-71670	DP193__6449
vOTU-71658	DP193__6385
vOTU-71576	DP193__5936
vOTU-71566	DP193__5906
vOTU-71496	DP193__5540
vOTU-71474	DP193__5443
vOTU-71464	DP193__5414
vOTU-71454	DP193__5381
vOTU-71396	DP193__5121
vOTU-71382	DP193__5063
vOTU-71377	DP193__5052
vOTU-71299	DP193__4617
vOTU-71259	DP193__4439
vOTU-71237	DP193__4381
vOTU-71191	DP193__4194
vOTU-71135	DP193__3996
vOTU-70394	DP193__362
vOTU-71067	DP193__3608
vOTU-71028	DP193__3429
vOTU-70970	DP193__3107
vOTU-70935	DP193__2899
vOTU-70918	DP193__2849
vOTU-76137	DP193__28006
vOTU-75848	DP193__26576
vOTU-75847	DP193__26569
vOTU-75835	DP193__26501
vOTU-75756	DP193__26150
vOTU-75702	DP193__25827
vOTU-75665	DP193__25606
vOTU-75519	DP193__24936
vOTU-75497	DP193__24828
vOTU-75417	DP193__24435
vOTU-75344	DP193__24157
vOTU-70808	DP193__2399
vOTU-75249	DP193__23681
vOTU-75228	DP193__23567
vOTU-75207	DP193__23466
vOTU-75134	DP193__23053
vOTU-75109	DP193__22965
vOTU-75075	DP193__22839
vOTU-75023	DP193__22596
vOTU-70766	DP193__2248
vOTU-74984	DP193__22367
vOTU-74936	DP193__22131
vOTU-70757	DP193__2201
vOTU-74794	DP193__21430
vOTU-74718	DP193__21101
vOTU-74665	DP193__20893
vOTU-74648	DP193__20813
vOTU-74558	DP193__20388
vOTU-74546	DP193__20327
vOTU-70714	DP193__2010
vOTU-74433	DP193__19748
vOTU-74216	DP193__18646
vOTU-74206	DP193__18586
vOTU-74194	DP193__18541
vOTU-74147	DP193__18330
vOTU-74140	DP193__18301
vOTU-74044	DP193__17802
vOTU-74035	DP193__17738
vOTU-74007	DP193__17628
vOTU-73892	DP193__17058
vOTU-73678	DP193__16022
vOTU-70624	DP193__1590
vOTU-73575	DP193__15576
vOTU-73542	DP193__15436
vOTU-73539	DP193__15403
vOTU-73527	DP193__15347
vOTU-73448	DP193__15008
vOTU-73380	DP193__14736
vOTU-73378	DP193__14714
vOTU-73294	DP193__14318
vOTU-73288	DP193__14294
vOTU-73224	DP193__14008
vOTU-73197	DP193__13870
vOTU-73120	DP193__13556
vOTU-73103	DP193__13437
vOTU-72975	DP193__12832
vOTU-72936	DP193__12668
vOTU-72912	DP193__12505
vOTU-72755	DP193__11768
vOTU-72749	DP193__11736
vOTU-72687	DP193__11401
vOTU-70533	DP193__1068
vOTU-72516	DP193__10553
vOTU-72461	DP193__10253
vOTU-70082	DP192__929
vOTU-70076	DP192__841
vOTU-70074	DP192__822
vOTU-70061	DP192__620
vOTU-70058	DP192__557
vOTU-70314	DP192__5454
vOTU-70308	DP192__5321
vOTU-70303	DP192__5260
vOTU-70302	DP192__5253
vOTU-70294	DP192__5119
vOTU-70054	DP192__489
vOTU-70283	DP192__4836
vOTU-70281	DP192__4834
vOTU-70274	DP192__4692
vOTU-70266	DP192__4523
vOTU-70257	DP192__4371
vOTU-70254	DP192__4344
vOTU-70248	DP192__4278
vOTU-70245	DP192__4223
vOTU-70235	DP192__3980
vOTU-70231	DP192__3843
vOTU-70230	DP192__3837
vOTU-70228	DP192__3777
vOTU-70225	DP192__3728
vOTU-70220	DP192__3595
vOTU-70193	DP192__3085
vOTU-70191	DP192__3078
vOTU-70028	DP192__27
vOTU-70172	DP192__2674
vOTU-70164	DP192__2555
vOTU-70161	DP192__2460
vOTU-70155	DP192__2413
vOTU-70149	DP192__2277
vOTU-70111	DP192__1615
vOTU-70101	DP192__1375
vOTU-70033	DP192__133
vOTU-69185	DP191__99
vOTU-69288	DP191__950
vOTU-69283	DP191__909
vOTU-69997	DP191__6719
vOTU-69990	DP191__6694
vOTU-69869	DP191__5728
vOTU-69770	DP191__4942
vOTU-69752	DP191__4821
vOTU-69702	DP191__4390
vOTU-69516	DP191__2690
vOTU-69484	DP191__2421
vOTU-69473	DP191__2323
vOTU-69401	DP191__1732
vOTU-69400	DP191__1731
vOTU-69192	DP191__171
vOTU-69291	DP191__1009
vOTU-69106	DP190__825
vOTU-69091	DP190__622
vOTU-69090	DP190__589
vOTU-69084	DP190__421
vOTU-69075	DP190__189
vOTU-69149	DP190__1689
vOTU-69148	DP190__1671
vOTU-69145	DP190__1652
vOTU-69141	DP190__1505
vOTU-69140	DP190__1489
vOTU-69138	DP190__1442
vOTU-69133	DP190__1342
vOTU-69131	DP190__1317
vOTU-69127	DP190__1245
vOTU-69125	DP190__1188
vOTU-58302	DP189__9995
vOTU-58214	DP189__9636
vOTU-58174	DP189__9479
vOTU-57903	DP189__8461
vOTU-57764	DP189__7944
vOTU-57745	DP189__7883
vOTU-57730	DP189__7817
vOTU-57668	DP189__7630
vOTU-57660	DP189__7607
vOTU-55757	DP189__750
vOTU-57552	DP189__7179
vOTU-57321	DP189__6274
vOTU-57144	DP189__5680
vOTU-57051	DP189__5401
vOTU-56985	DP189__5175
vOTU-56976	DP189__5112
vOTU-56956	DP189__5069
vOTU-68906	DP189__49798
vOTU-68836	DP189__49570
vOTU-68768	DP189__49319
vOTU-68677	DP189__48978
vOTU-68551	DP189__48504
vOTU-68453	DP189__48113
vOTU-68414	DP189__47994
vOTU-68334	DP189__47676
vOTU-68271	DP189__47483
vOTU-56871	DP189__4748
vOTU-68214	DP189__47297
vOTU-68202	DP189__47243
vOTU-56863	DP189__4715
vOTU-68160	DP189__47097
vOTU-68119	DP189__46976
vOTU-67962	DP189__46327
vOTU-67859	DP189__45930
vOTU-67853	DP189__45905
vOTU-56822	DP189__4546
vOTU-67520	DP189__44567
vOTU-67442	DP189__44311
vOTU-67434	DP189__44272
vOTU-67403	DP189__44174
vOTU-67380	DP189__44081
vOTU-67344	DP189__43953
vOTU-67225	DP189__43506
vOTU-67149	DP189__43201
vOTU-67049	DP189__42817
vOTU-67036	DP189__42754
vOTU-67027	DP189__42732
vOTU-66942	DP189__42401
vOTU-66939	DP189__42395
vOTU-66937	DP189__42390
vOTU-66908	DP189__42262
vOTU-66786	DP189__41799
vOTU-66772	DP189__41763
vOTU-66765	DP189__41735
vOTU-66620	DP189__41234
vOTU-66598	DP189__41146
vOTU-66521	DP189__40872
vOTU-66520	DP189__40869
vOTU-66480	DP189__40724
vOTU-66282	DP189__40011
vOTU-66034	DP189__39043
vOTU-65961	DP189__38760
vOTU-56632	DP189__3864
vOTU-65934	DP189__38630
vOTU-65930	DP189__38614
vOTU-65859	DP189__38348
vOTU-65686	DP189__37743
vOTU-65594	DP189__37387
vOTU-65406	DP189__36700
vOTU-65180	DP189__35894
vOTU-65006	DP189__35269
vOTU-64865	DP189__34717
vOTU-64790	DP189__34475
vOTU-64743	DP189__34325
vOTU-64613	DP189__33806
vOTU-64586	DP189__33669
vOTU-64563	DP189__33573
vOTU-64536	DP189__33471
vOTU-64483	DP189__33330
vOTU-56483	DP189__3320
vOTU-56474	DP189__3289
vOTU-64335	DP189__32678
vOTU-64334	DP189__32676
vOTU-64306	DP189__32580
vOTU-64254	DP189__32414
vOTU-64219	DP189__32294
vOTU-64207	DP189__32261
vOTU-64099	DP189__31860
vOTU-64062	DP189__31735
vOTU-63927	DP189__31225
vOTU-63915	DP189__31187
vOTU-63746	DP189__30498
vOTU-63708	DP189__30341
vOTU-63661	DP189__30163
vOTU-63623	DP189__30024
vOTU-63461	DP189__29365
vOTU-63427	DP189__29238
vOTU-63321	DP189__28814
vOTU-63266	DP189__28598
vOTU-63226	DP189__28447
vOTU-63202	DP189__28369
vOTU-62951	DP189__27442
vOTU-62931	DP189__27351
vOTU-62689	DP189__26454
vOTU-62628	DP189__26216
vOTU-62565	DP189__25990
vOTU-62335	DP189__25151
vOTU-62249	DP189__24854
vOTU-62235	DP189__24796
vOTU-62219	DP189__24759
vOTU-62201	DP189__24717
vOTU-62159	DP189__24538
vOTU-62120	DP189__24385
vOTU-61762	DP189__22989
vOTU-61730	DP189__22866
vOTU-61723	DP189__22837
vOTU-61696	DP189__22734
vOTU-61642	DP189__22493
vOTU-56158	DP189__2205
vOTU-61409	DP189__21553
vOTU-61388	DP189__21459
vOTU-61278	DP189__21058
vOTU-61269	DP189__21029
vOTU-61183	DP189__20721
vOTU-56118	DP189__2066
vOTU-61129	DP189__20544
vOTU-61124	DP189__20525
vOTU-61046	DP189__20210
vOTU-60773	DP189__19179
vOTU-60720	DP189__18982
vOTU-56077	DP189__1895
vOTU-60684	DP189__18844
vOTU-55607	DP189__187
vOTU-60635	DP189__18651
vOTU-60630	DP189__18630
vOTU-60625	DP189__18610
vOTU-60608	DP189__18559
vOTU-60497	DP189__18130
vOTU-60251	DP189__17281
vOTU-60167	DP189__16941
vOTU-60152	DP189__16895
vOTU-60111	DP189__16756
vOTU-60073	DP189__16608
vOTU-60047	DP189__16514
vOTU-59883	DP189__15933
vOTU-59880	DP189__15920
vOTU-59858	DP189__15843
vOTU-55997	DP189__1578
vOTU-59707	DP189__15222
vOTU-59673	DP189__15097
vOTU-59657	DP189__15042
vOTU-59609	DP189__14885
vOTU-55950	DP189__1422
vOTU-59299	DP189__13702
vOTU-59250	DP189__13496
vOTU-59168	DP189__13190
vOTU-59104	DP189__12931
vOTU-59079	DP189__12821
vOTU-59005	DP189__12560
vOTU-58970	DP189__12418
vOTU-58926	DP189__12288
vOTU-58925	DP189__12278
vOTU-58818	DP189__11878
vOTU-58655	DP189__11276
vOTU-58578	DP189__10975
vOTU-58573	DP189__10964
vOTU-58567	DP189__10941
vOTU-58533	DP189__10794
vOTU-58373	DP189__10251
vOTU-55528	DP188__996
vOTU-55527	DP188__977
vOTU-55511	DP188__96
vOTU-55526	DP188__750
vOTU-55525	DP188__748
vOTU-55523	DP188__623
vOTU-55509	DP188__62
vOTU-55521	DP188__584
vOTU-55520	DP188__495
vOTU-55519	DP188__456
vOTU-55518	DP188__409
vOTU-55517	DP188__361
vOTU-55516	DP188__336
vOTU-55515	DP188__274
vOTU-55513	DP188__222
vOTU-55551	DP188__2003
vOTU-55550	DP188__1924
vOTU-55549	DP188__1845
vOTU-55547	DP188__1802
vOTU-55544	DP188__1676
vOTU-55543	DP188__1606
vOTU-55542	DP188__1559
vOTU-55541	DP188__1557
vOTU-55540	DP188__1491
vOTU-55512	DP188__143
vOTU-55538	DP188__1288
vOTU-55537	DP188__1244
vOTU-55536	DP188__1201
vOTU-55534	DP188__1146
vOTU-55533	DP188__1059
vOTU-55532	DP188__1042
vOTU-55531	DP188__1035
vOTU-55530	DP188__1014
vOTU-55529	DP188__1011
vOTU-55461	DP187__938
vOTU-55448	DP187__728
vOTU-55442	DP187__642
vOTU-55437	DP187__576
vOTU-55435	DP187__547
vOTU-55433	DP187__520
vOTU-55429	DP187__371
vOTU-55428	DP187__366
vOTU-55427	DP187__333
vOTU-55426	DP187__328
vOTU-55416	DP187__32
vOTU-55507	DP187__1847
vOTU-55503	DP187__1810
vOTU-55499	DP187__1748
vOTU-55492	DP187__1638
vOTU-55487	DP187__1548
vOTU-55486	DP187__1526
vOTU-55481	DP187__1340
vOTU-55468	DP187__1067
vOTU-55069	DP186__988
vOTU-55059	DP186__883
vOTU-55053	DP186__846
vOTU-55049	DP186__819
vOTU-55047	DP186__794
vOTU-55045	DP186__789
vOTU-55041	DP186__747
vOTU-55027	DP186__622
vOTU-55023	DP186__564
vOTU-55021	DP186__549
vOTU-55014	DP186__506
vOTU-55397	DP186__4435
vOTU-55388	DP186__4289
vOTU-55004	DP186__403
vOTU-55370	DP186__4021
vOTU-55347	DP186__3801
vOTU-55340	DP186__3713
vOTU-55329	DP186__3657
vOTU-55323	DP186__3577
vOTU-55290	DP186__3289
vOTU-55001	DP186__327
vOTU-55287	DP186__3241
vOTU-55283	DP186__3211
vOTU-55263	DP186__3035
vOTU-55255	DP186__2964
vOTU-54998	DP186__290
vOTU-55249	DP186__2891
vOTU-55245	DP186__2836
vOTU-55237	DP186__2737
vOTU-55235	DP186__2731
vOTU-55234	DP186__2719
vOTU-55231	DP186__2691
vOTU-55218	DP186__2557
vOTU-55210	DP186__2456
vOTU-55205	DP186__2379
vOTU-55197	DP186__2327
vOTU-54994	DP186__230
vOTU-55195	DP186__2261
vOTU-55193	DP186__2248
vOTU-55192	DP186__2235
vOTU-55178	DP186__2115
vOTU-55162	DP186__1929
vOTU-55155	DP186__1847
vOTU-55149	DP186__1765
vOTU-55136	DP186__1675
vOTU-55134	DP186__1646
vOTU-55122	DP186__1571
vOTU-55121	DP186__1552
vOTU-55118	DP186__1537
vOTU-55115	DP186__1515
vOTU-55112	DP186__1470
vOTU-55108	DP186__1402
vOTU-55101	DP186__1300
vOTU-55086	DP186__1129
vOTU-54914	DP185__97
vOTU-54931	DP185__881
vOTU-54912	DP185__88
vOTU-54929	DP185__807
vOTU-54971	DP185__3744
vOTU-54969	DP185__3565
vOTU-54966	DP185__3090
vOTU-54963	DP185__2978
vOTU-54961	DP185__2905
vOTU-54960	DP185__2747
vOTU-54958	DP185__2597
vOTU-54957	DP185__2503
vOTU-54919	DP185__248
vOTU-54955	DP185__2424
vOTU-54954	DP185__2339
vOTU-54952	DP185__2248
vOTU-54917	DP185__218
vOTU-54949	DP185__2135
vOTU-54946	DP185__1962
vOTU-54943	DP185__1689
vOTU-54933	DP185__1117
vOTU-54857	DP184__893
vOTU-54856	DP184__887
vOTU-54817	DP184__76
vOTU-54848	DP184__739
vOTU-54847	DP184__690
vOTU-54846	DP184__680
vOTU-54844	DP184__605
vOTU-54842	DP184__542
vOTU-54838	DP184__355
vOTU-54837	DP184__354
vOTU-54815	DP184__34
vOTU-54834	DP184__300
vOTU-54830	DP184__282
vOTU-54910	DP184__2140
vOTU-54825	DP184__212
vOTU-54907	DP184__2041
vOTU-54902	DP184__1935
vOTU-54901	DP184__1926
vOTU-54900	DP184__1914
vOTU-54896	DP184__1851
vOTU-54824	DP184__175
vOTU-54891	DP184__1704
vOTU-54823	DP184__169
vOTU-54822	DP184__161
vOTU-54887	DP184__1594
vOTU-54885	DP184__1558
vOTU-54883	DP184__1514
vOTU-54882	DP184__1480
vOTU-54880	DP184__1437
vOTU-54819	DP184__120
vOTU-54874	DP184__1196
vOTU-54872	DP184__1170
vOTU-54868	DP184__1129
vOTU-54864	DP184__1064
vOTU-54862	DP184__1042
vOTU-54860	DP184__1006
vOTU-54789	DP183__78
vOTU-54800	DP183__309
vOTU-54798	DP183__258
vOTU-54797	DP183__257
vOTU-54792	DP183__167
vOTU-54791	DP183__120
vOTU-54784	DP183__12
vOTU-54684	DP182__712
vOTU-54650	DP182__70
vOTU-54679	DP182__616
vOTU-54676	DP182__579
vOTU-54664	DP182__259
vOTU-54782	DP182__2363
vOTU-54774	DP182__2217
vOTU-54773	DP182__2207
vOTU-54772	DP182__2202
vOTU-54771	DP182__2175
vOTU-54770	DP182__2173
vOTU-54768	DP182__2085
vOTU-54766	DP182__2039
vOTU-54760	DP182__1942
vOTU-54759	DP182__1864
vOTU-54753	DP182__1747
vOTU-54752	DP182__1744
vOTU-54744	DP182__1660
vOTU-54741	DP182__1624
vOTU-54740	DP182__1620
vOTU-54737	DP182__1573
vOTU-54724	DP182__1393
vOTU-54717	DP182__1316
vOTU-54654	DP182__122
vOTU-54699	DP182__1033
vOTU-54609	DP181__908
vOTU-54607	DP181__880
vOTU-54604	DP181__818
vOTU-54600	DP181__662
vOTU-54598	DP181__462
vOTU-54596	DP181__399
vOTU-54593	DP181__303
vOTU-54592	DP181__286
vOTU-54588	DP181__167
vOTU-54644	DP181__1601
vOTU-54642	DP181__1547
vOTU-54636	DP181__1414
vOTU-54632	DP181__1371
vOTU-54627	DP181__1284
vOTU-54626	DP181__1270
vOTU-54625	DP181__1266
vOTU-54622	DP181__1202
vOTU-54619	DP181__1117
vOTU-54616	DP181__1067
vOTU-54615	DP181__1062
vOTU-54614	DP181__1056
vOTU-54611	DP181__1011
vOTU-54552	DP180__978
vOTU-54548	DP180__889
vOTU-54546	DP180__832
vOTU-54544	DP180__750
vOTU-54543	DP180__740
vOTU-54528	DP180__7
vOTU-54541	DP180__536
vOTU-54539	DP180__485
vOTU-54537	DP180__428
vOTU-54536	DP180__367
vOTU-54529	DP180__34
vOTU-54535	DP180__339
vOTU-54531	DP180__187
vOTU-54581	DP180__1676
vOTU-54578	DP180__1622
vOTU-54577	DP180__1616
vOTU-54576	DP180__1608
vOTU-54574	DP180__1544
vOTU-54571	DP180__1470
vOTU-54570	DP180__1404
vOTU-54567	DP180__1320
vOTU-54564	DP180__1244
vOTU-54563	DP180__1219
vOTU-54561	DP180__1186
vOTU-54560	DP180__1177
vOTU-54557	DP180__1069
vOTU-54555	DP180__1046
vOTU-54553	DP180__1009
vOTU-54511	DP179__959
vOTU-54507	DP179__857
vOTU-54506	DP179__818
vOTU-54505	DP179__745
vOTU-54504	DP179__619
vOTU-54503	DP179__545
vOTU-54502	DP179__525
vOTU-54501	DP179__520
vOTU-54500	DP179__486
vOTU-54499	DP179__440
vOTU-54498	DP179__272
vOTU-54497	DP179__255
vOTU-54496	DP179__212
vOTU-54527	DP179__1553
vOTU-54526	DP179__1544
vOTU-54525	DP179__1536
vOTU-54493	DP179__149
vOTU-54524	DP179__1481
vOTU-54523	DP179__1474
vOTU-54521	DP179__1331
vOTU-54519	DP179__1311
vOTU-54518	DP179__1217
vOTU-54517	DP179__1157
vOTU-54516	DP179__1115
vOTU-54515	DP179__1093
vOTU-54514	DP179__1033
vOTU-54491	DP179__102
vOTU-54490	DP179__101
vOTU-54476	DP178__954
vOTU-54475	DP178__948
vOTU-54474	DP178__925
vOTU-54470	DP178__836
vOTU-54469	DP178__822
vOTU-54466	DP178__686
vOTU-54463	DP178__605
vOTU-54461	DP178__578
vOTU-54458	DP178__466
vOTU-54456	DP178__381
vOTU-54455	DP178__378
vOTU-54453	DP178__340
vOTU-54452	DP178__322
vOTU-54449	DP178__233
vOTU-54448	DP178__226
vOTU-54488	DP178__1444
vOTU-54487	DP178__1428
vOTU-54485	DP178__1350
vOTU-54484	DP178__1346
vOTU-54441	DP178__129
vOTU-54482	DP178__1284
vOTU-54480	DP178__1140
vOTU-54400	DP177__98
vOTU-54419	DP177__849
vOTU-54399	DP177__74
vOTU-54417	DP177__720
vOTU-54414	DP177__658
vOTU-54397	DP177__5
vOTU-54410	DP177__497
vOTU-54409	DP177__464
vOTU-54408	DP177__371
vOTU-54406	DP177__234
vOTU-54405	DP177__231
vOTU-54404	DP177__172
vOTU-54403	DP177__162
vOTU-54435	DP177__1477
vOTU-54431	DP177__1373
vOTU-54430	DP177__1370
vOTU-54429	DP177__1357
vOTU-54428	DP177__1198
vOTU-54426	DP177__1178
vOTU-54157	DP176__917
vOTU-54139	DP176__803
vOTU-54117	DP176__591
vOTU-54114	DP176__581
vOTU-54389	DP176__2808
vOTU-54384	DP176__2768
vOTU-54379	DP176__2739
vOTU-54368	DP176__2638
vOTU-54366	DP176__2616
vOTU-54350	DP176__2475
vOTU-54301	DP176__2055
vOTU-54279	DP176__1855
vOTU-54251	DP176__1667
vOTU-54242	DP176__1610
vOTU-54216	DP176__1380
vOTU-54210	DP176__1357
vOTU-54196	DP176__1186
vOTU-54193	DP176__1146
vOTU-54176	DP176__1050
vOTU-54174	DP176__1034
vOTU-54014	DP175__933
vOTU-54012	DP175__774
vOTU-54010	DP175__568
vOTU-54009	DP175__489
vOTU-54058	DP175__3315
vOTU-54057	DP175__3290
vOTU-54056	DP175__3287
vOTU-54055	DP175__3228
vOTU-54051	DP175__3014
vOTU-54047	DP175__2615
vOTU-54046	DP175__2572
vOTU-54043	DP175__2515
vOTU-54042	DP175__2514
vOTU-54041	DP175__2456
vOTU-54039	DP175__2293
vOTU-54037	DP175__2276
vOTU-54033	DP175__1893
vOTU-54031	DP175__1887
vOTU-54030	DP175__1875
vOTU-54027	DP175__1793
vOTU-54026	DP175__1593
vOTU-54024	DP175__1535
vOTU-54023	DP175__1463
vOTU-54022	DP175__1317
vOTU-54021	DP175__1292
vOTU-54019	DP175__1249
vOTU-54018	DP175__1147
vOTU-53996	DP174__978
vOTU-53995	DP174__953
vOTU-53994	DP174__883
vOTU-53991	DP174__713
vOTU-53989	DP174__642
vOTU-53988	DP174__637
vOTU-53987	DP174__633
vOTU-53982	DP174__406
vOTU-53980	DP174__370
vOTU-53979	DP174__329
vOTU-53978	DP174__296
vOTU-53977	DP174__241
vOTU-54004	DP174__1410
vOTU-54003	DP174__1409
vOTU-54002	DP174__1277
vOTU-54001	DP174__1223
vOTU-53999	DP174__1159
vOTU-53998	DP174__1099
vOTU-53974	DP174__108
vOTU-53898	DP173__979
vOTU-53895	DP173__907
vOTU-53893	DP173__887
vOTU-53841	DP173__79
vOTU-53885	DP173__768
vOTU-53878	DP173__644
vOTU-53839	DP173__63
vOTU-53876	DP173__580
vOTU-53872	DP173__546
vOTU-53871	DP173__537
vOTU-53870	DP173__506
vOTU-53868	DP173__465
vOTU-53866	DP173__441
vOTU-53864	DP173__432
vOTU-53837	DP173__41
vOTU-53861	DP173__400
vOTU-53836	DP173__4
vOTU-53858	DP173__359
vOTU-53857	DP173__355
vOTU-53855	DP173__303
vOTU-53854	DP173__282
vOTU-53853	DP173__264
vOTU-53852	DP173__260
vOTU-53851	DP173__251
vOTU-53848	DP173__225
vOTU-53846	DP173__211
vOTU-53970	DP173__2020
vOTU-53959	DP173__1856
vOTU-53958	DP173__1848
vOTU-53954	DP173__1784
vOTU-53952	DP173__1769
vOTU-53951	DP173__1754
vOTU-53943	DP173__1652
vOTU-53942	DP173__1641
vOTU-53941	DP173__1633
vOTU-53939	DP173__1595
vOTU-53936	DP173__1572
vOTU-53930	DP173__1458
vOTU-53926	DP173__1435
vOTU-53925	DP173__1423
vOTU-53923	DP173__1403
vOTU-53922	DP173__1391
vOTU-53921	DP173__1357
vOTU-53917	DP173__1266
vOTU-53915	DP173__1245
vOTU-53913	DP173__1218
vOTU-53843	DP173__120
vOTU-53911	DP173__1186
vOTU-53904	DP173__1077
vOTU-53903	DP173__1074
vOTU-53824	DP172__985
vOTU-53823	DP172__920
vOTU-53822	DP172__912
vOTU-53819	DP172__617
vOTU-53806	DP172__6
vOTU-53814	DP172__309
vOTU-53807	DP172__26
vOTU-53813	DP172__223
vOTU-53812	DP172__198
vOTU-53834	DP172__1863
vOTU-53833	DP172__1845
vOTU-53810	DP172__180
vOTU-53832	DP172__1780
vOTU-53830	DP172__1696
vOTU-53809	DP172__164
vOTU-53828	DP172__1327
vOTU-53827	DP172__1215
vOTU-53826	DP172__1137
vOTU-53825	DP172__1114
vOTU-53649	DP171__974
vOTU-53647	DP171__900
vOTU-53641	DP171__742
vOTU-53636	DP171__667
vOTU-53634	DP171__614
vOTU-53631	DP171__512
vOTU-53803	DP171__4938
vOTU-53628	DP171__476
vOTU-53626	DP171__465
vOTU-53625	DP171__459
vOTU-53793	DP171__4576
vOTU-53788	DP171__4488
vOTU-53786	DP171__4410
vOTU-53782	DP171__4317
vOTU-53777	DP171__4265
vOTU-53774	DP171__4239
vOTU-53771	DP171__4218
vOTU-53770	DP171__4168
vOTU-53764	DP171__4056
vOTU-53758	DP171__3922
vOTU-53756	DP171__3914
vOTU-53754	DP171__3877
vOTU-53752	DP171__3788
vOTU-53751	DP171__3777
vOTU-53748	DP171__3690
vOTU-53741	DP171__3506
vOTU-53734	DP171__3361
vOTU-53733	DP171__3341
vOTU-53621	DP171__333
vOTU-53731	DP171__3213
vOTU-53619	DP171__300
vOTU-53712	DP171__2775
vOTU-53707	DP171__2534
vOTU-53706	DP171__2481
vOTU-53705	DP171__2456
vOTU-53701	DP171__2291
vOTU-53694	DP171__2007
vOTU-53678	DP171__1643
vOTU-53677	DP171__1616
vOTU-53666	DP171__1266
vOTU-53661	DP171__1226
vOTU-53659	DP171__1214
vOTU-53612	DP171__117
vOTU-53652	DP171__1060
vOTU-53650	DP171__1032
vOTU-53582	DP170__61
vOTU-53605	DP170__455
vOTU-53601	DP170__421
vOTU-53595	DP170__331
vOTU-53594	DP170__319
vOTU-53592	DP170__268
vOTU-53580	DP170__26
vOTU-53556	DP169__60
vOTU-53576	DP169__370
vOTU-53574	DP169__350
vOTU-53573	DP169__337
vOTU-53572	DP169__336
vOTU-53569	DP169__261
vOTU-53568	DP169__249
vOTU-53566	DP169__226
vOTU-53559	DP169__116
vOTU-53553	DP168__635
vOTU-53552	DP168__632
vOTU-53548	DP168__585
vOTU-53521	DP168__56
vOTU-53545	DP168__559
vOTU-53541	DP168__509
vOTU-53540	DP168__464
vOTU-53539	DP168__461
vOTU-53538	DP168__435
vOTU-53536	DP168__409
vOTU-53533	DP168__375
vOTU-53532	DP168__341
vOTU-53528	DP168__281
vOTU-53525	DP168__204
vOTU-53513	DP167__956
vOTU-53512	DP167__944
vOTU-53511	DP167__927
vOTU-53510	DP167__898
vOTU-53509	DP167__831
vOTU-53508	DP167__790
vOTU-53505	DP167__758
vOTU-53503	DP167__608
vOTU-53502	DP167__597
vOTU-53501	DP167__395
vOTU-53500	DP167__364
vOTU-53499	DP167__324
vOTU-53498	DP167__235
vOTU-53496	DP167__216
vOTU-53495	DP167__175
vOTU-53490	DP167__12
vOTU-53518	DP167__1128
vOTU-53516	DP167__1039
vOTU-53494	DP167__100
vOTU-53453	DP166__7417
vOTU-53441	DP166__7290
vOTU-53423	DP166__7172
vOTU-52624	DP166__68
vOTU-53328	DP166__6376
vOTU-53320	DP166__6275
vOTU-53305	DP166__6149
vOTU-53304	DP166__6113
vOTU-53289	DP166__6030
vOTU-53286	DP166__6007
vOTU-53284	DP166__5987
vOTU-53281	DP166__5969
vOTU-53237	DP166__5619
vOTU-53211	DP166__5389
vOTU-53175	DP166__5093
vOTU-53113	DP166__4553
vOTU-52990	DP166__3458
vOTU-52968	DP166__3287
vOTU-52944	DP166__3110
vOTU-52943	DP166__3088
vOTU-52930	DP166__2940
vOTU-52928	DP166__2935
vOTU-52811	DP166__1878
vOTU-52791	DP166__1717
vOTU-52789	DP166__1693
vOTU-52740	DP166__1153
vOTU-52712	DP166__1015
vOTU-52341	DP165__951
vOTU-52603	DP165__8643
vOTU-52600	DP165__8581
vOTU-52599	DP165__8556
vOTU-52597	DP165__8355
vOTU-52584	DP165__8020
vOTU-52330	DP165__782
vOTU-52578	DP165__7801
vOTU-52556	DP165__7284
vOTU-52552	DP165__7161
vOTU-52551	DP165__7147
vOTU-52549	DP165__7106
vOTU-52545	DP165__7004
vOTU-52541	DP165__6940
vOTU-52540	DP165__6933
vOTU-52533	DP165__6743
vOTU-52525	DP165__6484
vOTU-52523	DP165__6422
vOTU-52517	DP165__6248
vOTU-52509	DP165__5947
vOTU-52501	DP165__5607
vOTU-52498	DP165__5556
vOTU-52324	DP165__524
vOTU-52323	DP165__508
vOTU-52473	DP165__4960
vOTU-52464	DP165__4622
vOTU-52458	DP165__4403
vOTU-52454	DP165__4283
vOTU-52445	DP165__4093
vOTU-52441	DP165__4002
vOTU-52416	DP165__3431
vOTU-52412	DP165__3279
vOTU-52379	DP165__2214
vOTU-52370	DP165__1840
vOTU-52357	DP165__1488
vOTU-52348	DP165__1218
vOTU-52347	DP165__1154
vOTU-52346	DP165__1139
vOTU-51962	DP164__980
vOTU-51961	DP164__974
vOTU-51814	DP164__96
vOTU-51956	DP164__951
vOTU-51954	DP164__924
vOTU-51944	DP164__857
vOTU-51941	DP164__849
vOTU-51930	DP164__774
vOTU-51916	DP164__682
vOTU-51888	DP164__516
vOTU-51880	DP164__472
vOTU-51802	DP164__47
vOTU-51879	DP164__436
vOTU-51867	DP164__352
vOTU-51856	DP164__299
vOTU-52279	DP164__2803
vOTU-51797	DP164__28
vOTU-52278	DP164__2798
vOTU-52276	DP164__2783
vOTU-52272	DP164__2774
vOTU-52265	DP164__2738
vOTU-52254	DP164__2680
vOTU-52253	DP164__2679
vOTU-52240	DP164__2564
vOTU-52232	DP164__2512
vOTU-51843	DP164__247
[truncated: 2,393 more rows]
